# Supplementary material for: Assembly of iodinated indolo[1,2-c]quinazoline amines via I2/CHP-promoted cascade annulation of isocyanides and diarylalkynes
Source: Royal Society of Chemistry journal article supplement (doi:10.1039/d3qo00799e), 2023-01-01

# Supporting Information

## Assembly of Iodinated Indolo[1,2-*c*]quinazoline Amines *via* I<sub>2</sub>/CHP-Promoted Cascade Annulation of Isocyanides and Diarylalkynes

Min Zhang,<sup>a</sup> Meng Li,<sup>a</sup> Huanfeng Jiang,<sup>a</sup> Biao Nie<sup>\*,b</sup> and Wanqing Wu<sup>\*,a</sup>

<sup>a</sup> Key Laboratory of Functional Molecular Engineering of Guangdong Province, State Key Laboratory of Luminescent Materials and Devices, School of Chemistry and Chemical Engineering, South China University of Technology, Guangzhou 510640, China.

*E-mail: cewuwq@scut.edu.cn. Fax and Tel.: (+86) 20-87112906*

### Table of Contents

|                                                                                                       |            |
|-------------------------------------------------------------------------------------------------------|------------|
| <b>A. General Information.....</b>                                                                    | <b>S2</b>  |
| <b>B. Optimization of Reaction Conditions.....</b>                                                    | <b>S2</b>  |
| <b>C. General Procedure for Synthesis of Starting Materials.....</b>                                  | <b>S5</b>  |
| <b>D. General Procedure for the Synthesis of Indolo[1,2-<i>c</i>]quinazoline<br/>Derivatives.....</b> | <b>S5</b>  |
| <b>E. Mechanistic Studies.....</b>                                                                    | <b>S6</b>  |
| <b>F. Synthetic Applications.....</b>                                                                 | <b>S8</b>  |
| <b>G. Characterization Data for materials.....</b>                                                    | <b>S10</b> |
| <b>H. Characterization Data for All Products.....</b>                                                 | <b>S12</b> |
| <b>I. X-ray Crystallographic Analysis.....</b>                                                        | <b>S19</b> |
| <b>J. References.....</b>                                                                             | <b>S20</b> |
| <b>K. Copies of <sup>1</sup>H and <sup>13</sup>C NMR Spectra.....</b>                                 | <b>S21</b> |

## A. General Information

All purchased reagents and solvents were used without further purification unless otherwise noted. Analytical thin layer chromatography was performed by using commercially prepared 100-400 mesh silica gel plates (GF<sub>254</sub>) and visualization was effected at 254 nm. All the 2,2'-(ethyne-1,2-diyl)dianilines were prepared according to known procedures. <sup>1</sup>H and <sup>13</sup>C NMR spectra were recorded using a Bruker DRX-400 spectrometer using CDCl<sub>3</sub> as solvent. The chemical shifts are referenced to signals at 7.26 and 77.0 ppm, respectively. Mass spectra were recorded on a Thermo Scientific ISQ gas chromatograph-mass spectrometer. The data of HRMS was carried out on a high-resolution mass spectrometer (LCMS-IT-TOF). IR spectra were obtained either as potassium bromide pellets or as liquid films between two potassium bromide pellets with a Bruker TENSOR 27 spectrometer. Melting points were determined with a Büchi Melting Point B-545 instrument.

## B. Optimization of Reaction Conditions

### (a) Optimization for Reaction Temperature<sup>a</sup>

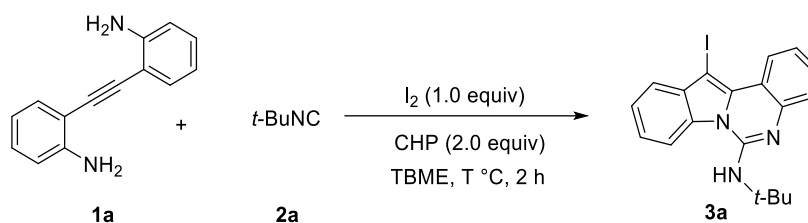

| Entry | T (°C) | Yield of <b>3a</b> <sup>b</sup> (%) |
|-------|--------|-------------------------------------|
| 1     | 95     | 17                                  |
| 2     | 85     | 18                                  |
| 3     | 75     | 10                                  |
| 4     | 70     | 37                                  |
| 5     | 65     | 36                                  |
| 6     | 45     | 30                                  |
| 7     | 40     | 44                                  |
| 8     | 25     | 33                                  |
| 9     | -5     | 29                                  |

<sup>a</sup>Reaction Conditions: Unless otherwise noted, all reactions were performed with **1a** (0.1 mmol, 1 equiv), **2a** (0.15mmol, 1.5 equiv), CHP (0.2 mmol, 2.0 equiv), I<sub>2</sub> (1.0 mmol, 1.0 equiv) in TBME under air at T °C for 2 h. <sup>b</sup>Determined by <sup>1</sup>H NMR using CH<sub>2</sub>Br<sub>2</sub> as the internal standard. CHP = Cumene hydroperoxide. TBME = *tert*-Butyl hydroperoxide.

### (b) Screening of Iodine Amounts<sup>a</sup>

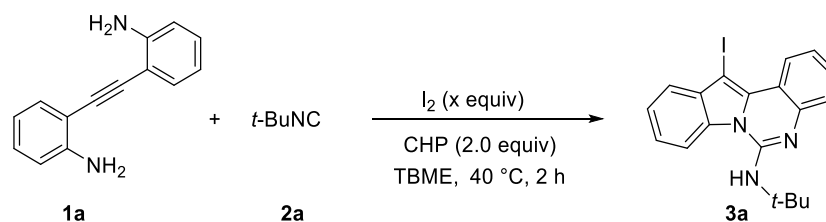

| Entry | $I_2$ (x equiv) | Yield of <b>3a</b> <sup>b</sup> (%) |
|-------|-----------------|-------------------------------------|
| 1     | $I_2$ (0.5)     | 38                                  |
| 2     | $I_2$ (0.75)    | 46                                  |
| 3     | $I_2$ (1.0)     | 38                                  |
| 4     | $I_2$ (1.5)     | 25                                  |
| 5     | $I_2$ (2.0)     | trace                               |

<sup>a</sup>Reaction condition: **1a** (0.1 mmol), **2a** (0.15 mmol),  $I_2$  (x equiv), solvent (1 mL), oxidant (0.2 mmol, 2 equiv), 40 °C, 2 h. <sup>b</sup>Determined by <sup>1</sup>H NMR using CH<sub>2</sub>Br<sub>2</sub> as an internal standard. CHP = Cumene hydroperoxide. TBME = *tert*-Butyl hydroperoxide.

### (c) Screening of Solvent<sup>a</sup>

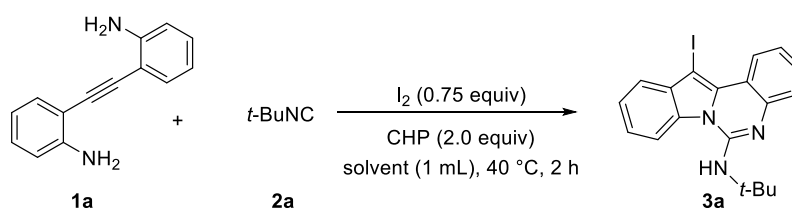

| Entry | Solvent     | Yield of <b>3a</b> <sup>b</sup> (%) |
|-------|-------------|-------------------------------------|
| 1     | THF         | n.d.                                |
| 2     | 1,4-Dioxane | 45                                  |
| 3     | DECS        | 40                                  |
| 4     | Toluene     | 28                                  |
| 5     | DMSO        | 24                                  |
| 6     | CPME        | 48                                  |
| 7     | TBME        | 52                                  |

<sup>a</sup>Reaction condition: **1a** (0.1 mmol), **2a** (0.15 mmol), oxidant (0.2 mmol, 2.0 equiv), I<sub>2</sub> (0.075 mmol, 0.75 equiv) in solvent (1 mL) under air at 40 °C for 2 h. <sup>b</sup>Determined by <sup>1</sup>H NMR using CH<sub>2</sub>Br<sub>2</sub> as an internal standard. CHP = Cumene hydroperoxide. DECS = 2-(2-Ethoxyethoxy)ethanol. CPME = Cyclopentyl methyl ether. TBME = *tert*-Butyl hydroperoxide. n.d. = not detected.

#### (d) Screening of Additive<sup>a</sup>

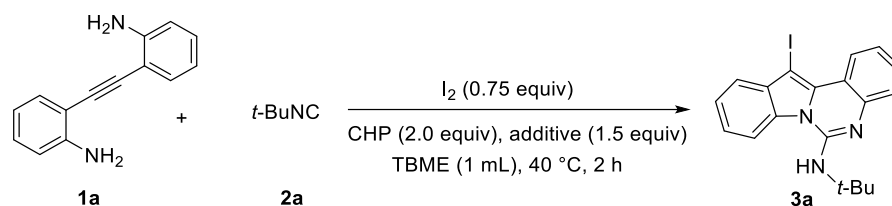

| Entry     | Additive                         | Yield of <b>3a</b> <sup>b</sup> (%) |
|-----------|----------------------------------|-------------------------------------|
| 1         | Ca(OH) <sub>2</sub>              | 16                                  |
| 2         | NaNO <sub>2</sub>                | 49                                  |
| 3         | KHCO <sub>3</sub>                | 53                                  |
| 4         | Na <sub>2</sub> HPO <sub>4</sub> | 38                                  |
| 5         | Na <sub>2</sub> SO <sub>3</sub>  | 48                                  |
| 6         | NaHSO <sub>3</sub>               | 54                                  |
| 7         | NaOOCPh                          | 55                                  |
| 8         | Malonic acid                     | 2                                   |
| 9         | NH <sub>4</sub> Cl               | 32                                  |
| 10        | CaCO <sub>3</sub>                | 40                                  |
| 11        | NaH                              | 13                                  |
| 12        | KBF <sub>4</sub>                 | 62                                  |
| 13        | KBr                              | 39                                  |
| <b>14</b> | <b>Zn(OAc)<sub>2</sub></b>       | <b>76 (70)</b>                      |

<sup>a</sup>Reaction Conditions: Unless otherwise noted, all reactions were performed with **1a** (0.1 mmol, 1.0 equiv), **2a** (0.15 mmol, 1.5 equiv), additive (0.15 mmol, 1.5 equiv), CHP (0.2 mmol, 2.0 equiv), I<sub>2</sub> (0.075 mmol, 0.75 equiv) in TBME under air at 40 °C for 2 h. <sup>b</sup>Determined by <sup>1</sup>H NMR using CH<sub>2</sub>Br<sub>2</sub> as the internal standard. TBME = *tert*-Butyl hydroperoxide. CHP = Cumene hydroperoxide. Data in the parentheses was referred to isolated yield.

### C. General Procedure for the Synthesis of Starting Materials

Unless otherwise specified, functionalized alkynes were synthesized *via* the following steps:

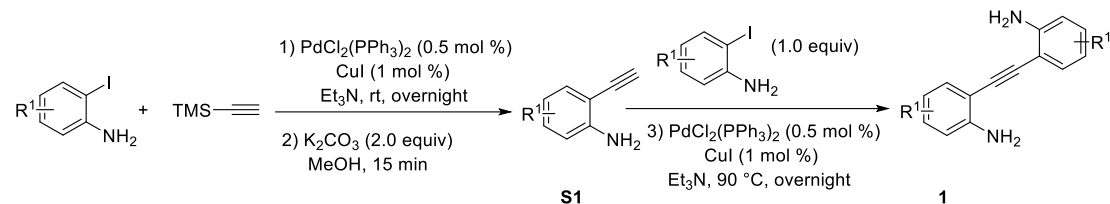

Step 1: To an oven-dried round bottom flask containing a magnetic stir bar was added aryl halide (1.0 equiv), Pd(PPh<sub>3</sub>)<sub>2</sub>Cl<sub>2</sub> (0.5 mol %), and CuI (1 mol %). The vessel was then sealed with a rubber septum, evacuated, and backfilled with argon three times. Et<sub>3</sub>N (solvent, *c* = 0.5 M) and trimethylsilylacetylene (1.5 equiv) were added in sequence. After the reaction was completed at room temperature (monitored by TLC), solvent was removed under reduced pressure and the resulting residue was directly purified by flash column chromatography (eluent: hexanes/EtOAc) on silica gel. To the crude product (1.0 equiv) in MeOH (solvent, *c* = 0.2 M) was added K<sub>2</sub>CO<sub>3</sub> (2.0 equiv) in one portion. After the reaction was completed at room temperature (monitored by TLC), the resulting mixture was filtered through a short pad of silica gel and washed with petroleum ether. The filtrate was concentrated under reduced pressure to afford product **S1** which was directly used for next step without further purification.

Step 2: To an oven-dried round bottom flask containing a magnetic stir bar was added the aryl halide (1.0 equiv), Pd(PPh<sub>3</sub>)<sub>2</sub>Cl<sub>2</sub> (0.5 mol %), and CuI (1 mol %). The vessel was then sealed with a rubber septum, evacuated, and backfilled with argon three times. Et<sub>3</sub>N (solvent, *c* = 0.5 M) and **S1** (1.2 equiv) were added in sequence. After the reaction was completed at 90 °C overnight, solvent was removed under reduced pressure and the resulting residue was directly purified by flash column chromatography (eluent: hexanes/EtOAc = 5:1-10:1) on silica gel to give the final product **1** (yields: 25-80%)

### D. General Procedure for the Synthesis of 3a

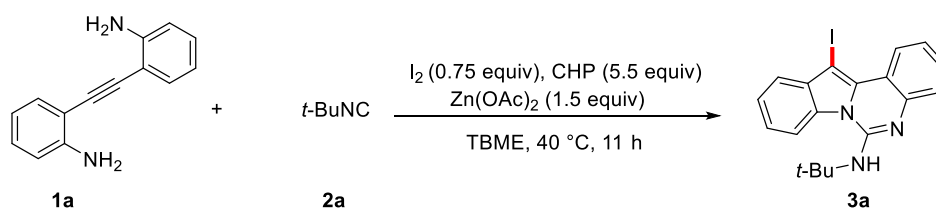

A mixture of diarylalkynes (**1a**, 0.10 mmol, 20.8 mg), *tert*-butyl isocyanide (**2a**, 0.15 mmol, 12.5 mg), I<sub>2</sub> (0.75 equiv, 19.0 mg), CHP (5.5 equiv, 104.6 mg), Zn(OAc)<sub>2</sub> (1.5 equiv, 27.5 mg) and 1.0 mL of TBME was added to a test tube equipped with a magnetic stirring bar. The mixture was then stirred at 40 °C under air for 11 h. Then the reaction was quenched by H<sub>2</sub>O and extracted with ethyl acetate, dried over anhydrous Na<sub>2</sub>SO<sub>4</sub>, filtered, and evaporated under vacuum. The crude product was purified by column chromatography on neutral alumina with light petroleum ether/ethyl acetate as eluent to afford the desired product **3a** (33.8 mg, 81%).

## E. Mechanistic Studies

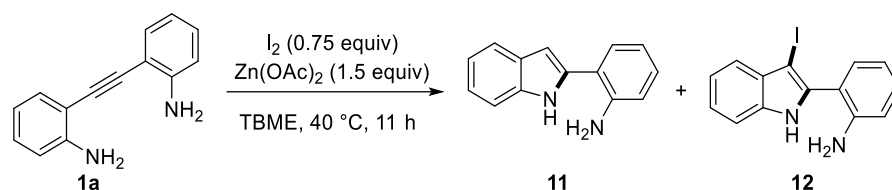

(a) A mixture of 2,2'-(ethyne-1,2-diyl)dianiline (**1a**, 0.10 mmol, 20.8 mg),  $I_2$  (0.75 equiv, 19.0 mg),  $Zn(OAc)_2$  (1.5 equiv, 27.5 mg) and 1.0 mL of TBME was added to a test tube equipped with a magnetic stirring bar. The mixture was then stirred at 40 °C under air for 11 h. Then the reaction was quenched by  $H_2O$  and extracted with ethyl acetate, dried over anhydrous  $Na_2SO_4$ , filtered, and evaporated under vacuum. The crude product was purified by column chromatography on neutral alumina with light petroleum ether/ethyl acetate as eluent to afford product **11** (2.0 mg, 10%) and product **12** (20.7 mg, 62%).

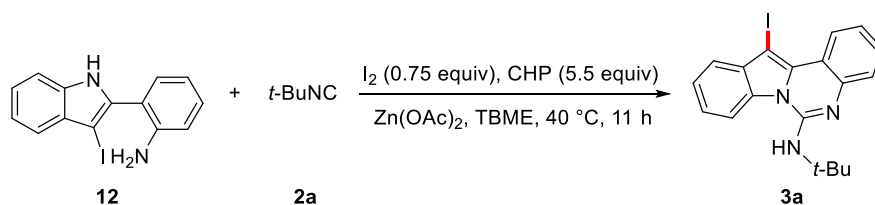

(b) 2-(3-iodo-1*H*-indol-2-yl)aniline (**12**, 0.1 mmol, 33.4 mg), *tert*-butyl isocyanide (**2a**, 0.15 mmol, 12.5 mg),  $I_2$  (0.75 equiv, 19.0 mg), CHP (5.5 equiv, 104.6 mg),  $Zn(OAc)_2$  (1.5 equiv, 27.5 mg), and 1.0 mL of TBME were added to a tube equipped with a stir bar and stirred at 40 °C for 11 h. Then the reaction was quenched by  $H_2O$  and extracted with ethyl acetate, dried over anhydrous  $Na_2SO_4$ , filtered, and evaporated under vacuum. The crude product was purified by column chromatography on silica gel with light petroleum ether as eluent to afford the desired product **3a** (29.9 mg, 72%).

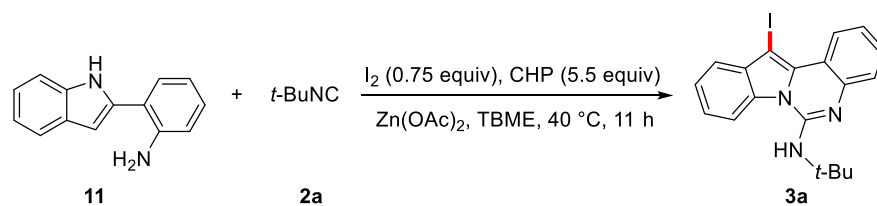

(c) 2-(1*H*-indol-2-yl)aniline (**11**, 0.1 mmol, 20.8 mg), *tert*-butyl isocyanide (**2a**, 0.15 mmol, 12.5 mg),  $I_2$  (0.75 equiv, 19.0 mg), CHP (5.5 equiv, 104.6 mg),  $Zn(OAc)_2$  (1.5 equiv, 27.5 mg), and 1.0 mL of TBME were added to a tube equipped with a stir bar and stirred at 40 °C for 11 h. Then the reaction was quenched by  $H_2O$  and extracted with ethyl acetate, dried over anhydrous  $Na_2SO_4$ , filtered, and evaporated under vacuum. The crude product was purified by column chromatography on silica gel with light petroleum ether as eluent to afford the desired product **3a** (26.1 mg, 63%).

***N*-(*tert*-Butyl)-12-iodoindolo[1,2-*c*]quinazolin-6-amine (3a) (400MHz, CDCl<sub>3</sub>)**

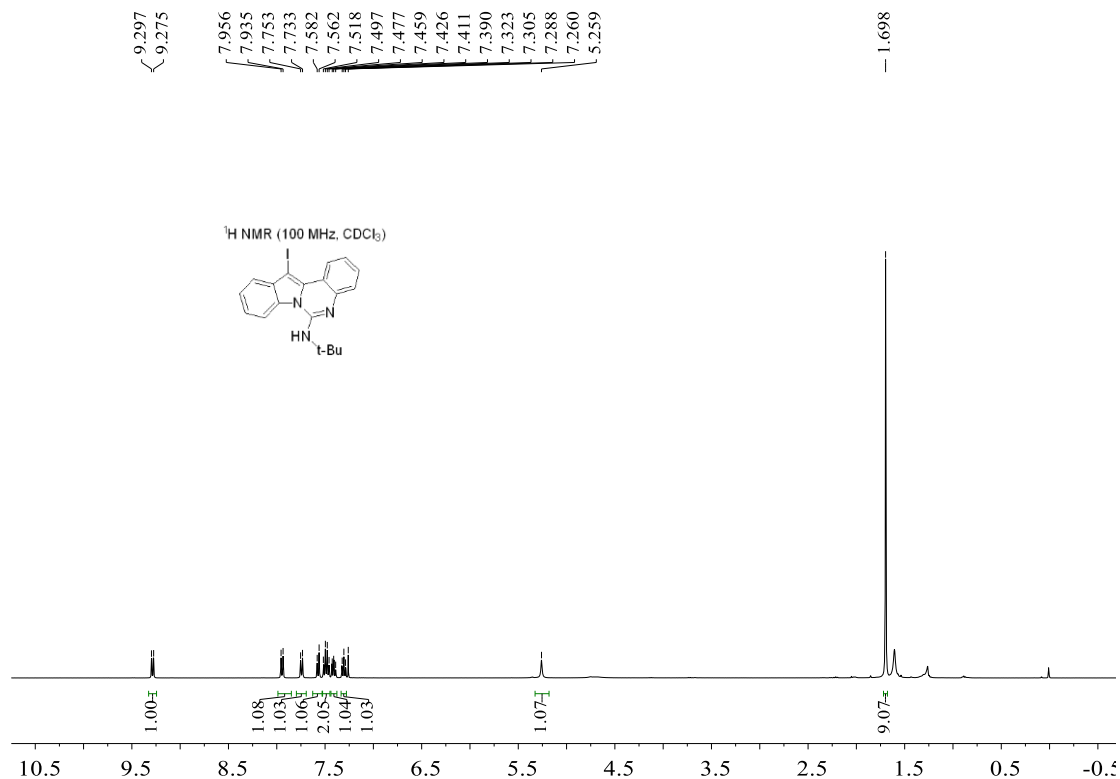

(d) A mixture of 2,2'-(ethyne-1,2-diyl)dianiline (**1a**, 0.10 mmol, 20.8 mg), *tert*-butyl isocyanide (**2a**, 0.15 mmol, 12.5 mg), I<sub>2</sub> (0.75 equiv, 19.0 mg), CHP (5.5 equiv, 104.6 mg), Radical scavenger (1.0 equiv), Zn(OAc)<sub>2</sub> (1.5 equiv, 27.5 mg) and 1.0 mL of TBME was added to a test tube equipped with a magnetic stirring bar. The mixture was then stirred at 40 °C under air for 11 h. Then the reaction was quenched by H<sub>2</sub>O and extracted with ethyl acetate, dried over anhydrous Na<sub>2</sub>SO<sub>4</sub>, filtered, and evaporated under vacuum. The crude product was purified by column chromatography on neutral alumina with light petroleum ether/ethyl acetate as eluent. Through adding different radical scavengers to the standard condition, product **3ab** was provided with the following yield.

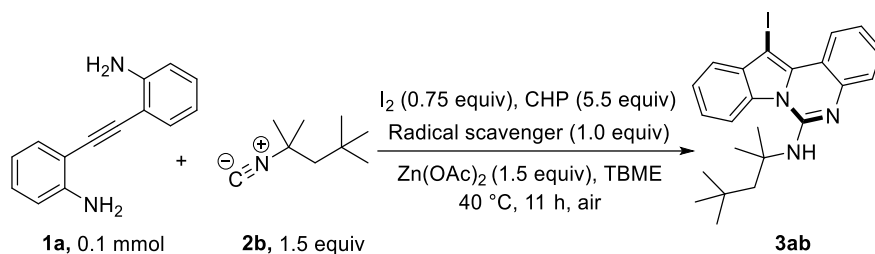

| Entry <sup>a</sup> | Radical scavenger (1.0 equiv) | Yield of <b>3ab</b> (%) <sup>b</sup> |
|--------------------|-------------------------------|--------------------------------------|
| 1                  | TEMPO                         | n.d.                                 |
| 2                  | BHT                           | n.d.                                 |
| 3                  | 1,1-diphenylethylene          | 70%                                  |

<sup>a</sup>Reaction conditions: **1a** (0.1 mmol), **2b** (0.15 mmol, 1.5 equiv), I<sub>2</sub> (0.075 mmol, 0.75 equiv), CHP (0.55 mmol, 5.5 equiv), Zn(OAc)<sub>2</sub> (0.15 mmol, 1.5 equiv) and TBME were added to a test tube at 40 °C under air for 11 h. TEMPO = 2,2,6,6-Tetramethylpiperidine 1-oxyl, BHT = Butylated hydroxytoluene. CHP = Cumene hydroperoxide. TBME = *tert*-Butyl hydroperoxide. <sup>b</sup>Isolated yield. n.d. = not detected

## F. General Procedures for the Synthetic Applications

### (i) 2.0 mmol Experiment

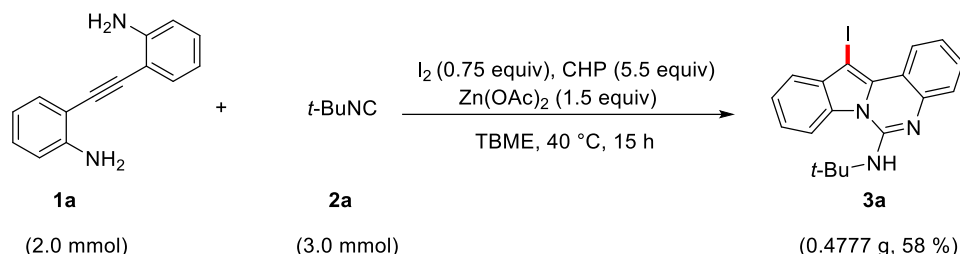

A mixture of 2,2'-(ethyne-1,2-diyl)dianiline (**1a**, 2.00 mmol, 0.416 g), *tert*-butyl isocyanide (**2a**, 3.00 mmol, 0.249 g), I<sub>2</sub> (0.75 equiv, 380 mg), CHP (5.5 equiv, 2.093 g), Zn(OAc)<sub>2</sub> (1.5 equiv, 0.550 g), and 10.0 mL of TBME were added to a tube equipped with a stir bar and stirred at 40 °C for 15 h. Then the reaction was quenched by H<sub>2</sub>O and extracted with ethyl acetate, dried over anhydrous Na<sub>2</sub>SO<sub>4</sub>, filtered, and evaporated under vacuum. The crude product was purified by column chromatography on neutral alumina with light petroleum ether as eluent to afford the desired product **3a** (0.4777 g, 58%).

### (ii) Synthetic Procedure for 4

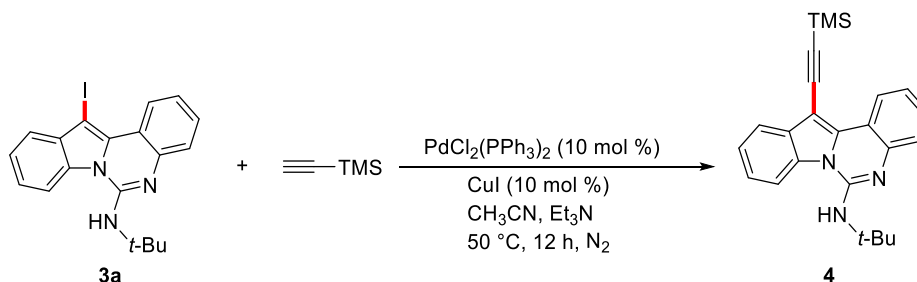

*N*-(*tert*-butyl)-12-iodoindolo[1,2-*c*]quinazolin-6-amine (**3a**, 0.1 mmol, 41.5 mg), ethynyltrimethylsilane (0.2 mmol, 19.6 mg), PdCl<sub>2</sub>(PPh<sub>3</sub>)<sub>2</sub> (10 mol %, 7.0 mg), CuI (10 mol %, 2.0 mg), CH<sub>3</sub>CN (1.0 mL) and Et<sub>3</sub>N (1.0 mL) were added to a test tube under nitrogen atmosphere. Then the mixture was stirred at 50 °C for 12 h. After the reaction was completed (monitored by TLC), the resulting mixture was extracted with ethyl acetate. The combined organic layers were evaporated under vacuum, and then washed with brine and dried over anhydrous Na<sub>2</sub>SO<sub>4</sub>. Filtration, evaporation, and chromatography on silica gel with light petroleum as eluent afforded the desired product **4** (35.4 mg, 92%).

### (iii) Deprotection of 4



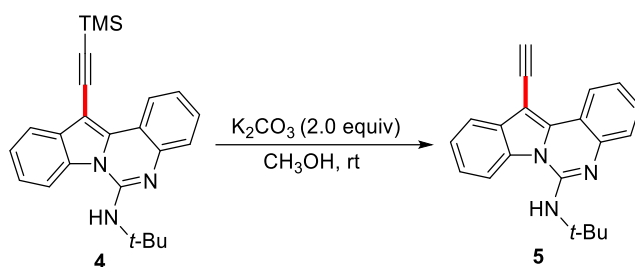

To a side-necked sealable tube equipped with stir bar was added **4** (38.5 mg, 0.1 mmol),  $\text{K}_2\text{CO}_3$  (2.0 equiv, 27.6 mg) and  $\text{CH}_3\text{OH}$  (1.0 mL). The reaction was sealed and stirred at room temperature for 15 min. The product was then extracted with dichloromethane. The combined organics were dried with anhydrous  $\text{Na}_2\text{SO}_4$ , filtered, and concentrated under reduced pressure. The resulting residue was purified by column chromatography on silica gel with light petroleum ether/ethyl acetate as eluent to afford the desired product **5** (30.6 mg, 98%).

#### (iv) Deprotection of **3a**

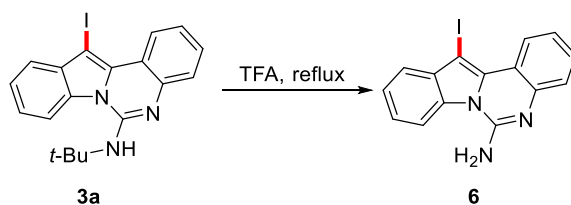

To a side-necked sealable tube equipped with stir bar was added **3a** (41.5 mg, 0.1 mmol) and TFA (1.0 mL). The reaction was sealed and heated at reflux for 3 h. The reaction tube was allowed to cool to room temperature. The mixture was dropped slowly into saturated aqueous  $\text{NaHCO}_3$ . The product was then extracted with diethyl ether. The combined organics were dried with anhydrous  $\text{Na}_2\text{SO}_4$ , filtered, and concentrated under reduced pressure. The resulting residue was purified by column chromatography on silica gel with light petroleum ether/ethyl acetate as eluent to afford the desired product **6** (26.5 mg, 41%).

#### (v) Synthetic Procedure for **7**

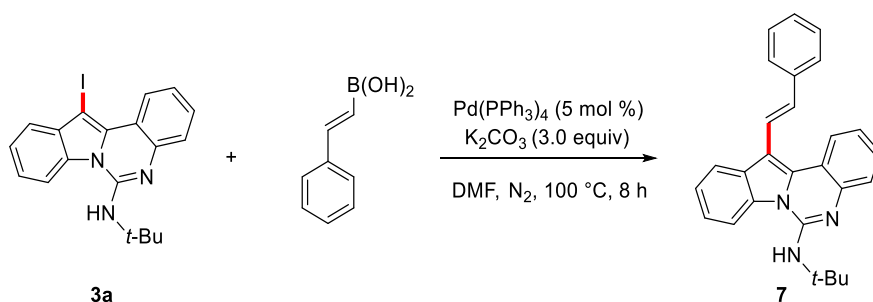

*N*-(*tert*-butyl)-12-iodoindolo[1,2-*c*]quinazolin-6-amine (**3a**, 0.1 mmol, 41.5 mg), (*E*)-styrylboronic acid (0.2 mmol, 29.6 mg),  $\text{Pd}(\text{PPh}_3)_4$  (5 mol %, 5.8 mg),  $\text{K}_2\text{CO}_3$  (3.0 equiv, 41.5 mg) and DMF (1.0 mL) were added to a test tube under nitrogen atmosphere. Then the mixture was stirred at 100 °C for 8 h. After the reaction was completed (monitored by TLC), the resulting mixture was extracted with ethyl acetate. The combined organic layers were evaporated under vacuum and then washed

with brine and dried over anhydrous Na<sub>2</sub>SO<sub>4</sub>. Filtration, evaporation, and chromatography on silica gel with light petroleum as eluent afforded the desired product **7** (34.3 mg, 88%).

#### (vi) Synthetic Procedure for **8**

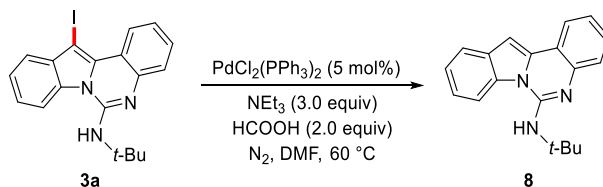

*N*-(*tert*-butyl)-12-iodoindolo[1,2-*c*]quinazolin-6-amine (**3a**, 0.1 mmol, 41.5 mg), PdCl<sub>2</sub>(PPh<sub>3</sub>)<sub>2</sub> (5 mol %, 3.5 mg), NEt<sub>3</sub> (3.0 equiv, 42 μL), HCOOH (2.0 equiv, 9.2 mg) and DMF (1.0 mL) were added to a test tube under nitrogen atmosphere. After the reaction was completed (monitored by TLC), the resulting mixture was extracted with ethyl acetate. The combined organic layers were evaporated under vacuum and then washed with brine and dried over anhydrous Na<sub>2</sub>SO<sub>4</sub>. Filtration, evaporation, and chromatography on silica gel with light petroleum as eluent afforded the desired product **8** (25.1 mg, 87%).

#### (vii) Synthetic Procedure for **9** or **10**

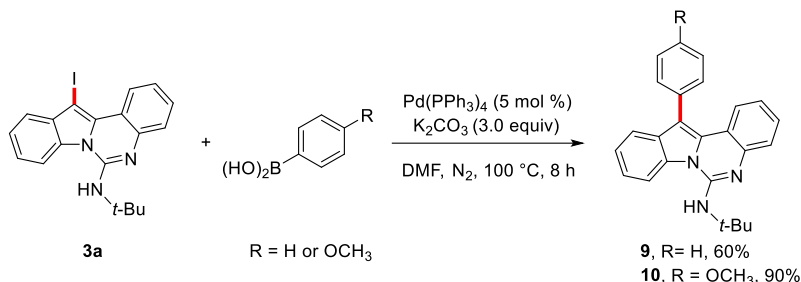

*N*-(*tert*-butyl)-12-iodoindolo[1,2-*c*]quinazolin-6-amine (**3a**, 0.1 mmol, 41.5 mg), phenylboronic acid (0.2 mmol, 24.4 mg) or (4-methoxyphenyl)boronic acid (0.2 mmol, 30.4 mg), Pd(PPh<sub>3</sub>)<sub>4</sub> (5 mol %, 5.8 mg), K<sub>2</sub>CO<sub>3</sub> (3.0 equiv, 41.5 mg) and DMF (1.0 mL) were added to a test tube under nitrogen atmosphere. Then the mixture was stirred at 100 °C for 8 h. After the reaction was completed (monitored by TLC), the resulting mixture was extracted with ethyl acetate. The combined organic layers were evaporated under vacuum and then washed with brine and dried over anhydrous Na<sub>2</sub>SO<sub>4</sub>. Filtration, evaporation, and chromatography on silica gel with light petroleum as eluent afforded the desired product **9** (21.9 mg, 60 %) or **10** (35.4 mg, 90%).

## G. Characterization Data for Starting Materials

### 6,6'-(Ethyne-1,2-diyl)bis(3-chloroaniline) (**1k**)

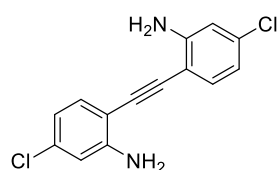

Yellow solid (25%, 138.0 mg); mp: 157.2-157.5 °C; Isolation by column chromatography (petroleum ether/ethyl acetate: 10/1); <sup>1</sup>H NMR (400 MHz, CDCl<sub>3</sub>) δ 7.25 (d, *J* = 8.3 Hz, 1H), 6.91 – 6.56 (m, 2H), 4.33 (s, 2H); <sup>13</sup>C NMR (100 MHz, CDCl<sub>3</sub>) δ 146.3, 131.2, 129.9, 122.3, 115.5, 108.8, 90.7. IR: ν<sub>max</sub>(KBr) = 3459, 3365, 3217, 2360, 1613, 1613, 1551, 1490, 1422, 1248, 1092, 914, 852, 802, 741 cm<sup>-1</sup>; HRMS (ESI) *m/z*: calcd for C<sub>14</sub>H<sub>10</sub>Cl<sub>2</sub>N<sub>2</sub> [M-H]<sup>-</sup>: 275.0150 (100%), 277.0119 (63.9%), found 275.0148 (100%), 277.0119 (63.9%).

### 2,2'-(Ethyne-1,2-diyl)bis(4-chloroaniline) (1c)

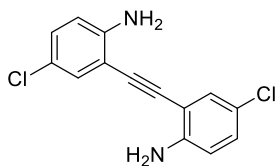

Yellow solid (60%, 331.2 mg); mp: 168.9-169.9 °C; Isolation by column chromatography (petroleum ether/ethyl acetate: 10/1); <sup>1</sup>H NMR (400 MHz, CDCl<sub>3</sub>) δ 7.31 (s, 1H), 7.10 (dd, *J* = 8.6, 2.4 Hz, 2H), 6.66 (d, *J* = 8.7 Hz, 2H); <sup>13</sup>C NMR (100 MHz, CDCl<sub>3</sub>) δ 146.3, 131.2, 129.9, 122.3, 115.5, 108.8, 90.7, 77.3, 77.0, 76.6; IR: ν<sub>max</sub>(KBr) = 3447, 3358, 3053, 2922, 2854, 2356, 1710, 1613, 1486, 1414, 1306, 1243, 1147, 1088, 884, 812, 755, 650 cm<sup>-1</sup>; HRMS (ESI) m/z: calcd for C<sub>14</sub>H<sub>10</sub>Cl<sub>2</sub>N<sub>2</sub> [M+H]<sup>+</sup>: 277.0290 (100 %), 279.0260 (63.9 %), found 277.0294 (100 %), 279.0264 (63.9 %).

### 2,2'-(Ethyne-1,2-diyl)bis(4-methoxyaniline) (1g)

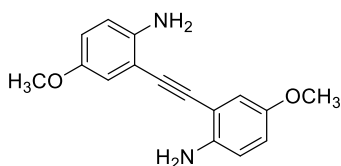

Yellow solid (30%, 160.8 mg); mp: 180.3-181.3 °C; Isolation by column chromatography (petroleum ether/ethyl acetate: 6/1); <sup>1</sup>H NMR (400 MHz, CDCl<sub>3</sub>) δ 6.91 (d, *J* = 2.9 Hz, 1H), 6.79 (dd, *J* = 8.8, 2.9 Hz, 1H), 6.69 (d, *J* = 8.8 Hz, 1H), 3.75 (s, 3H); <sup>13</sup>C NMR (100 MHz, CDCl<sub>3</sub>) δ 151.9, 141.8, 117.4, 116.0, 115.7, 108.6, 91.1, 77.3, 77.0, 76.6, 55.8. IR: ν<sub>max</sub>(KBr) = 3424, 3346, 3202, 2966, 2928, 2358, 1714, 1606, 1495, 1456, 1316, 1277, 1244, 1208, 1172, 1139, 1032, 959, 849, 809, 755, 666 cm<sup>-1</sup>; HRMS (ESI) m/z: calcd for C<sub>16</sub>H<sub>16</sub>N<sub>2</sub>O<sub>2</sub> [M+H]<sup>+</sup>: 269.1285, found 269.1279.

### 6,6'-(Ethyne-1,2-diyl)bis(3-fluoroaniline) (1i)

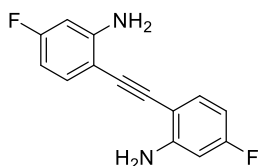

Yellow solid (40%, 195.2 mg); mp: 133.5-134.5 °C; Isolation by column chromatography (petroleum ether/ethyl acetate: 10/1); <sup>1</sup>H NMR (400 MHz, CDCl<sub>3</sub>) δ 7.29 (dd, *J* = 9.2, 6.3 Hz, 1H), 6.50 – 6.32 (m, 2H), 4.42 (d, *J* = 22.3 Hz, 2H); <sup>13</sup>C NMR (100 MHz, CDCl<sub>3</sub>) δ 163.7 (d, *J* = 245.8 Hz), 149.4 (d, *J* = 11.7 Hz), 133.6 (d, *J* = 10.4 Hz), 105.3 (d, *J* = 22.5 Hz), 103.9 (d, *J* = 2.4 Hz), 101.1 (d, *J* = 25.3 Hz), 89.6; <sup>19</sup>F NMR (376 MHz, CDCl<sub>3</sub>) δ -109.6; IR: ν<sub>max</sub>(KBr) = 3449, 3361, 2358, 1615, 1503, 1436, 1253, 1169, 970, 845, 805, 677, 509, 463 cm<sup>-1</sup>; HRMS (ESI) m/z: calcd for C<sub>14</sub>H<sub>10</sub>F<sub>2</sub>N<sub>2</sub> [M+H]<sup>+</sup>: 245.0885, found 245.0881.

### 6,6'-(Ethyne-1,2-diyl)bis(2-chloro-4-fluoroaniline) (1o)

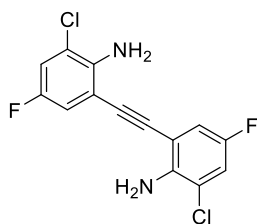

Yellow solid (60%, 374.4 mg); mp: 154.5-155.5 °C; Isolation by column chromatography (petroleum ether/ethyl acetate: 10/1); <sup>1</sup>H NMR (400 MHz, CDCl<sub>3</sub>) δ 7.19 – 7.10 (m, 1H), 7.03 (dd, *J* = 10.5, 2.3 Hz, 1H), 4.29 (s, 2H); <sup>13</sup>C NMR (100 MHz, CDCl<sub>3</sub>) δ 150.7 (d, *J* = 241.4 Hz), 135.4 (d, *J* = 13.6 Hz), 126.8 (d, *J* = 3.3 Hz), 121.5 (d, *J* = 10.6 Hz), 116.7 (d, *J* = 21.8 Hz), 109.7 (d, *J* = 6.0 Hz), 90.4 (d, *J* = 5.0 Hz); <sup>19</sup>F NMR (376 MHz, CDCl<sub>3</sub>) δ -131.4; IR: ν<sub>max</sub>(KBr) = 2360, 1701, 1622, 1567, 1524, 1483, 1430, 1300, 1218, 1171, 1085, 987, 906, 852, 739, 674 cm<sup>-1</sup>; HRMS (ESI) m/z: calcd for C<sub>14</sub>H<sub>8</sub>Cl<sub>2</sub>F<sub>2</sub>N<sub>2</sub> [M+H]<sup>+</sup>: 313.0101 (100%), 315.0070 (63.9%), found 313.0105 (100%), 315.0076 (63.9%).

### 6,6'-(Ethyne-1,2-diyl)bis(3-(trifluoromethyl)aniline) (1j)

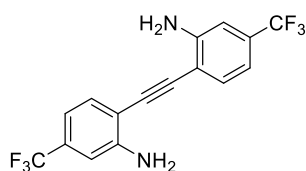

Yellow solid (30%, 206.4 mg); mp: 85.5-86.5 °C; Isolation by column chromatography (petroleum ether/ethyl acetate: 8/1);  $^1\text{H}$  NMR (400 MHz,  $\text{CDCl}_3$ )  $\delta$  7.44 (t,  $J = 7.4$  Hz, 1H), 7.07 – 6.84 (m, 2H), 4.49 (d,  $J = 19.8$  Hz, 2H);  $^{13}\text{C}$  NMR (100 MHz,  $\text{CDCl}_3$ )  $\delta$  147.8, 133.6, 132.5, 131.9 (q,  $J = 32.3$  Hz), 123.8 (q,  $J = 270.7$  Hz), ;114.4 (q,  $J = 3.5$  Hz), 110.9 (q,  $J = 3.9$  Hz), 91.6;  $^{19}\text{F}$  NMR (376 MHz,  $\text{CDCl}_3$ )  $\delta$  -63.1; IR:  $\nu_{\text{max}}(\text{KBr}) = 1616, 1504, 1437, 1336, 1244, 1165, 1119, 925, 865, 811, 751$   $\text{cm}^{-1}$ ; HRMS (ESI)  $m/z$ : calcd for  $\text{C}_{16}\text{H}_{10}\text{F}_6\text{N}_2$   $[\text{M}-\text{H}]^-$ : 343.0675, found 343.0675.

### 2,2'-(Ethyne-1,2-diyl)bis(4-(tert-Butyl)aniline) (1h)

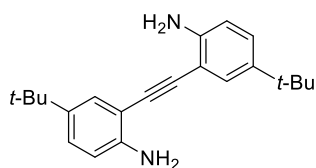

Yellow solid (44%, 281.8 mg); mp: 150.4-151.4 °C; Isolation by column chromatography (petroleum ether/ethyl acetate: 10/1);  $^1\text{H}$  NMR (400 MHz,  $\text{CDCl}_3$ )  $\delta$  7.39 (d,  $J = 2.1$  Hz, 1H), 7.20 (dd,  $J = 8.4, 2.2$  Hz, 1H), 6.70 (d,  $J = 8.5$  Hz, 1H), 4.19 (s, 2H), 1.29 (s, 9H);  $^{13}\text{C}$  NMR (100 MHz,  $\text{CDCl}_3$ )  $\delta$  145.2, 140.91, 128.6, 126.9, 114.3, 107.7, 91.0, 33.8, 31.3; IR  $\nu_{\text{max}}(\text{KBr}) = 3489, 3401, 3316, 3265, 3185, 2956, 2860, 2361, 1715, 1623, 1504, 1464, 1416, 1361, 1322, 1258, 1207, 1161, 1104, 1023, 884, 821, 744, 693, 627$   $\text{cm}^{-1}$ ; HRMS (ESI)  $m/z$ : calcd for  $\text{C}_{22}\text{H}_{28}\text{N}_2$   $[\text{M}+\text{H}]^+$ : 321.2325, found 321.2318.

### 3,3'-(Ethyne-1,2-diyl)bis(pyridin-2-amine) (1p)

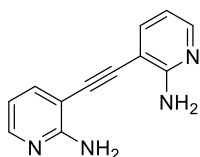

Yellow solid (40%, 168.1 mg); mp: 244.5-245.5 °C; Isolation by column chromatography (petroleum ether/ethyl acetate: 6/1);  $^1\text{H}$  NMR (400 MHz,  $\text{CDCl}_3$ )  $\delta$  8.05 (dd,  $J = 5.0, 1.8$  Hz, 1H), 7.60 (dt,  $J = 7.5, 1.8$  Hz, 1H), 6.65 (ddd,  $J = 12.8, 7.6, 5.0$  Hz, 1H), 5.17 (d,  $J = 18.6$  Hz, 2H);  $^{13}\text{C}$  NMR (100 MHz,  $\text{CDCl}_3$ )  $\delta$  158.6, 148.2, 140.1, 113.6, 102.6, 90.4; IR:  $\nu_{\text{max}}(\text{KBr}) = 3455, 3379, 3303, 2924, 2854, 2358, 2216, 1718, 1615, 1563, 1494, 1452, 1319, 1272, 1163, 1027, 819, 755, 693$   $\text{cm}^{-1}$ ; HRMS (ESI)  $m/z$ : calcd for  $\text{C}_{12}\text{H}_{10}\text{N}_4$   $[\text{M}+\text{H}]^+$ : 211.0978, found 211.0975.

### 2-(1H-Indol-2-yl)aniline (11)<sup>[1]</sup>

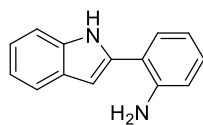

Yellow solid.  $^1\text{H}$  NMR (400 MHz,  $\text{CDCl}_3$ )  $\delta$  8.47 (s, 1H), 7.66 (d,  $J = 7.8$  Hz, 1H), 7.47 – 7.35 (m, 2H), 7.25 – 7.10 (m, 3H), 6.94 – 6.78 (m, 2H), 6.73 (d,  $J = 2.1$  Hz, 1H), 4.10 (s, 2H);  $^{13}\text{C}$  NMR (100 MHz,  $\text{CDCl}_3$ )  $\delta$  144.0, 136.1, 135.8, 129.2, 129.0, 128.8, 122.1, 120.3, 120.1, 119.0, 118.7, 116.5, 110.8, 101.5.

### 2-(3-iodo-1H-indol-2-yl)aniline (12)<sup>[2]</sup>

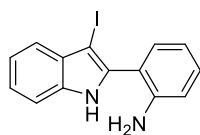

Brown solid.  $^1\text{H}$  NMR (400 MHz,  $\text{CDCl}_3$ )  $\delta$  8.65 (s, 1H), 7.51 (d,  $J = 7.2$  Hz, 1H), 7.37 – 7.31 (m, 2H), 7.28 (d,  $J = 5.5$  Hz, 1H), 7.23 (d,  $J = 7.0$  Hz, 1H), 6.88 (t,  $J = 7.8$  Hz, 1H), 6.81 (d,  $J = 8.1$  Hz, 1H), 3.84 (s, 2H);  $^{13}\text{C}$  NMR (100 MHz,  $\text{CDCl}_3$ )  $\delta$  144.7, 136.9, 136.2, 131.5, 131.1, 130.4, 123.4, 121.2, 120.9, 118.5, 117.7, 116.1,

111.1, 60.5.

## H. Characterization Data for All Products

### *N*-(tert-Butyl)-12-iodoindolo[1,2-*c*]quinazolin-6-amine (3a)

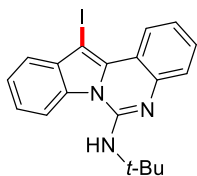

Yellow solid (81%, 33.6 mg); mp: 173.1-174.1 °C; Isolation by column chromatography (petroleum ether); <sup>1</sup>H NMR (400 MHz, CDCl<sub>3</sub>) δ 9.29 (d, *J* = 9.0 Hz, 1H), 7.95 (d, *J* = 8.3 Hz, 1H), 7.74 (d, *J* = 8.0 Hz, 1H), 7.57 (d, *J* = 8.0 Hz, 1H), 7.49 (q, *J* = 7.8, 7.3 Hz, 2H), 7.44 – 7.38 (m, 1H), 7.31 (t, *J* = 6.9 Hz, 1H), 5.26 (s, 1H), 1.70 (s, 9H); <sup>13</sup>C NMR (100 MHz, CDCl<sub>3</sub>) δ 143.7, 141.9, 133.3, 133.2, 130.0, 129.6, 125.4, 123.6, 123.3, 122.9, 122.3, 117.3, 112.8, 52.9, 29.2. IR:  $\nu_{\max}$ (KBr) = 1611, 1528, 1448, 1347, 1267, 1204, 753 cm<sup>-1</sup>; HRMS (ESI) *m/z*: calcd for C<sub>19</sub>H<sub>18</sub>IN<sub>3</sub> [M+H]<sup>+</sup>: 416.0618, found 416.0616.

***N*-(*tert*-Butyl)-2,10-difluoro-12-iodoindolo[1,2-*c*]quinazolin-6-amine (3b)**

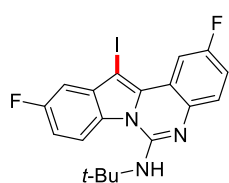

White solid (72%, 32.5 mg); mp: 209.8-210.7 °C; Isolation by column chromatography (petroleum ether); <sup>1</sup>H NMR (400 MHz, CDCl<sub>3</sub>) δ 8.91 (d, *J* = 10.4 Hz, 1H), 7.89 (dd, *J* = 9.0, 3.9 Hz, 1H), 7.52 (dd, *J* = 8.8, 5.5 Hz, 1H), 7.34 (d, *J* = 8.9 Hz, 1H), 7.27 – 7.17 (m, 1H), 7.12 (t, *J* = 8.8 Hz, 1H), 5.00 (s, 1H), 1.68 (s, 9H); <sup>13</sup>C NMR (100 MHz, CDCl<sub>3</sub>) δ 159.7 (d, *J* = 240.7 Hz), 158.0 (d, *J* = 238.9 Hz), 142.9, 138.3, 134.5 (d, *J* = 10.4 Hz), 133.9 (d, *J* = 4.1 Hz), 127.1 (d, *J* = 8.4 Hz), 126.5, 117.7 (d, *J* = 23.4 Hz), 114.2 (d, *J* = 9.6 Hz), 111.5 (d, *J* = 26 Hz), 108.7 (d, *J* = 25.9 Hz), 107.5 (d, *J* = 24.5 Hz), 53.1, 29.2; <sup>19</sup>F NMR (376 MHz, CDCl<sub>3</sub>) δ -117.7, -117.8; IR:  $\nu_{\max}$ (KBr) = 2831, 1619, 1540, 1470, 1364, 1319, 1267, 1197, 1091, 1025, 967, 847, 809, 757 cm<sup>-1</sup>; HRMS (ESI) *m/z*: calcd for C<sub>19</sub>H<sub>16</sub>F<sub>2</sub>IN<sub>3</sub> [M+H]<sup>+</sup>: 452.0430, found 452.0421.

***N*-(*tert*-Butyl)-2,10-dichloro-12-iodoindolo[1,2-*c*]quinazolin-6-amine (3c)**

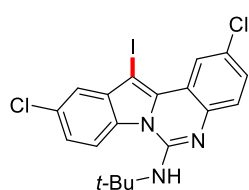

White solid (63%, 30.4 mg); mp: 256.4-257.4 °C; Isolation by column chromatography (petroleum ether); <sup>1</sup>H NMR (400 MHz, CDCl<sub>3</sub>) δ 9.20 (s, 1H), 7.84 (d, *J* = 8.9 Hz, 1H), 7.69 (s, 1H), 7.48 (d, *J* = 8.6 Hz, 1H), 7.42 (dd, *J* = 8.6, 2.3 Hz, 1H), 7.35 (dd, *J* = 8.9, 2.1 Hz, 1H), 5.09 (s, 1H), 1.68 (s, 9H); <sup>13</sup>C NMR (100 MHz, CDCl<sub>3</sub>) δ 143.4, 140.4, 134.4, 130.1, 128.4, 127.6, 126.9, 125.5, 123.5, 122.6, 121.9, 113.9, 53.2, 29.2; IR:  $\nu_{\max}$ (KBr) = 1615, 1441, 1342, 1267, 816, 755 cm<sup>-1</sup>; HRMS (ESI) *m/z*: calcd for C<sub>19</sub>H<sub>16</sub>Cl<sub>2</sub>IN<sub>3</sub> [M-H]<sup>-</sup>: 481.9691 (100%), 483.9660 (63.9%), found 481.9693 (100%), 483.9664 (63.9%).

**2,10-Dibromo-*N*-(*tert*-Butyl)-12-iodoindolo[1,2-*c*]quinazolin-6-amine (3d)**

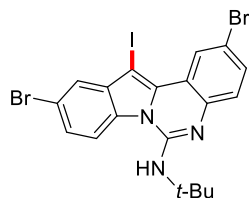

White solid (61%, 34.8 mg); mp: 198.4-199.4 °C; Isolation by column chromatography (petroleum ether); <sup>1</sup>H NMR (400 MHz, CDCl<sub>3</sub>) δ 9.34 (s, 1H), 7.84 (s, 1H), 7.78 (d, *J* = 8.8 Hz, 1H), 7.55 (d, *J* = 9.8 Hz, 1H), 7.48 (d, *J* = 8.2 Hz, 1H), 7.41 (d, *J* = 8.6 Hz, 1H), 5.09 (s, 1H), 1.67 (s, 9H); <sup>13</sup>C NMR (100 MHz, CDCl<sub>3</sub>) δ 143.5, 140.8, 134.8, 132.9, 128.7, 127.2, 126.1, 125.6, 125.0, 118.4, 117.4, 115.2, 114.2, 53.3, 29.2; IR:  $\nu_{\max}$ (KBr) = 2962, 2855, 2813, 1621, 1547, 1387, 1346, 1267, 1204, 1033, 856, 803, 758 cm<sup>-1</sup>; HRMS (ESI) Calcd for C<sub>19</sub>H<sub>16</sub>Br<sub>2</sub>IN<sub>3</sub> [M-H]<sup>-</sup>: 569.8682 (51.4%), 571.8661 (100%), found 569.8683 (51.4%), 571.8662 (100%).

***N*-(*tert*-Butyl)-12-iodo-2,10-bis(trifluoromethyl)indolo[1,2-*c*]quinazolin-6-amine (3e)**

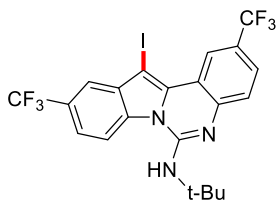

White solid (48%, 26.4 mg); mp: 225.5-226.4 °C; Isolation by column chromatography (petroleum ether);  $^1\text{H NMR}$  (400 MHz,  $\text{CDCl}_3$ )  $\delta$  9.56 (d,  $J = 2.0$  Hz, 1H), 8.06 – 7.99 (m, 2H), 7.69 (ddd,  $J = 14.5, 8.6, 1.9$  Hz, 2H), 7.63 (d,  $J = 8.5$  Hz, 1H), 5.34 (s, 1H), 1.71 (s, 9H);  $^{13}\text{C NMR}$  (100 MHz,  $\text{CDCl}_3$ )  $\delta$  144.4, 144.3 (d,  $J = 0.7$  Hz), 134.0, 133.0, 131.3, 126.6 (q,  $J = 3.7$  Hz), 126.1, 124.6 (q,  $J = 270$  Hz), 124.3 (q,  $J = 270.5$  Hz), 124.1 (q,  $J = 32.4$  Hz), 120.9 (q,  $J = 4.1$  Hz), 120.3 (q,  $J = 4.0$  Hz), 120.1 (q,  $J = 3.4$  Hz), 116.7, 113.3, 54.4, 53.6, 29.1;  $^{19}\text{F NMR}$  (376 MHz,  $\text{CDCl}_3$ )  $\delta$  -61.1, -61.7; IR:  $\nu_{\text{max}}$ (KBr) = 2853, 1661, 1555, 1331, 1111, 878, 832, 797, 754  $\text{cm}^{-1}$ ; HRMS (ESI)  $m/z$ : calcd for  $\text{C}_{21}\text{H}_{16}\text{F}_6\text{IN}_3$   $[\text{M}+\text{H}]^+$ : 552.0290, found 552.0295.

#### *N*-(*tert*-Butyl)-12-iodo-2,10-dimethylindolo[1,2-*c*]quinazolin-6-amine (3f)

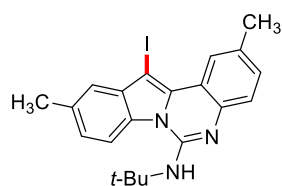

White solid (54%, 23.9 mg); mp: 167.1-168.1 °C; Isolation by column chromatography (petroleum ether);  $^1\text{H NMR}$  (400 MHz,  $\text{CDCl}_3$ )  $\delta$  9.12 (d,  $J = 8.2$  Hz, 1H), 7.71 (s, 1H), 7.58 (d,  $J = 8.1$  Hz, 1H), 7.38 (s, 1H), 7.30 – 7.23 (m, 1H), 7.11 (d,  $J = 8.2$  Hz, 1H), 5.23 (s, 1H), 2.59 (s, 3H), 2.46 (s, 3H), 1.69 (s, 9H);  $^{13}\text{C NMR}$  (100 MHz,  $\text{CDCl}_3$ )  $\delta$  143.9, 141.8, 139.6, 133.0, 132.6, 131.2, 130.2, 125.4, 125.0, 123.6, 123.0, 121.7, 114.9, 113.0, 52.8, 52.2, 29.2, 22.3, 21.5; IR:  $\nu_{\text{max}}$ (KBr) = 3308, 2963, 1707, 1635, 1542, 1372, 1326, 1212, 794, 752  $\text{cm}^{-1}$ ; HRMS (ESI) Calcd for  $\text{C}_{21}\text{H}_{22}\text{IN}_3$   $[\text{M}+\text{H}]^+$ : 444.0931, found 444.0929.

#### *N*-(*tert*-Butyl)-12-iodo-2,10-dimethoxyindolo[1,2-*c*]quinazolin-6-amine (3g)

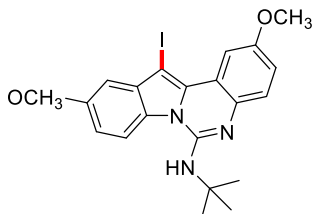

White solid (35%, 16.6 mg); mp: 147.2-148.2 °C; Isolation by column chromatography (petroleum ether);  $^1\text{H NMR}$  (400 MHz,  $\text{CDCl}_3$ )  $\delta$  8.81 (d,  $J = 2.7$  Hz, 1H), 7.87 (d,  $J = 9.1$  Hz, 1H), 7.53 (d,  $J = 8.9$  Hz, 1H), 7.17 – 7.08 (m, 2H), 7.01 (dd,  $J = 9.1, 2.5$  Hz, 1H), 4.99 (s, 1H), 3.97 (s, 6H), 1.67 (s, 9H);  $^{13}\text{C NMR}$  (100 MHz,  $\text{CDCl}_3$ )  $\delta$  156.6, 154.9, 142.6, 136.1, 134.2, 133.6, 126.7, 124.9, 118.2, 117.5, 114.1, 112.9, 105.5, 103.2, 55.7, 55.7, 52.8, 52.3, 29.3; IR:  $\nu_{\text{max}}$ (KBr) = 3315, 2829, 1717, 1624, 1547, 1366, 1323, 1205, 774  $\text{cm}^{-1}$ ; HRMS (ESI)  $m/z$ : calcd for  $\text{C}_{21}\text{H}_{20}\text{IN}_3$   $[\text{M}+\text{H}]^+$ : 476.0829, found 476.0822.

#### *N*,2,10-Tri-*tert*-Butyl-12-iodoindolo[1,2-*c*]quinazolin-6-amine (3h)

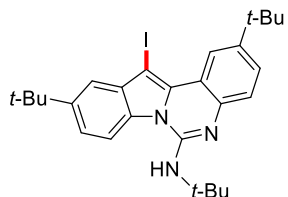

White solid (81%, 42.7 mg); mp: 143.9-144.6 °C; Isolation by column chromatography (petroleum ether);  $^1\text{H NMR}$  (400 MHz,  $\text{CDCl}_3$ )  $\delta$  9.35 (s, 1H), 7.89 (d,  $J = 8.8$  Hz, 1H), 7.72 (s, 1H), 7.60 – 7.45 (m, 3H), 5.21 (s, 1H), 1.68 (s, 9H), 1.48 (d,  $J = 5.4$  Hz, 18H);  $^{13}\text{C NMR}$  (100 MHz,  $\text{CDCl}_3$ )  $\delta$  146.8, 145.3, 143.6, 139.6, 133.7, 132.9, 128.1, 127.3, 124.9, 121.1, 119.8, 118.2, 116.6, 112.6, 52.8, 35.0, 34.8, 31.7, 31.6, 29.2; IR:  $\nu_{\text{max}}$ (KBr) = 2848, 2385, 2343, 1710, 1663, 1588, 1526, 1480, 1378, 780  $\text{cm}^{-1}$ ; HRMS (ESI) Calcd for  $\text{C}_{27}\text{H}_{34}\text{IN}_3$   $[\text{M}+\text{H}]^+$ : 528.1870, found 528.1871.

#### *N*-(*tert*-Butyl)-3,9-difluoro-12-iodoindolo[1,2-*c*]quinazolin-6-amine (3i)

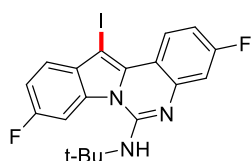

White solid (33%, 14.9 mg); mp: 200.4-201.4 °C; Isolation by column chromatography (petroleum ether);  $^1\text{H NMR}$  (400 MHz,  $\text{CDCl}_3$ )  $\delta$  9.17 (dd,  $J = 8.9, 6.1$  Hz, 1H), 7.71 – 7.57 (m, 2H), 7.25 – 7.18 (m, 2H), 7.05 – 6.98 (m, 1H), 5.05 (s, 1H), 1.68 (s, 9H);  $^{13}\text{C NMR}$  (100 MHz,  $\text{CDCl}_3$ )  $\delta$  163.5 (d,  $J =$

246.7 Hz), 159.5 (d,  $J = 239.4$  Hz), 143.9, 143.7 (d,  $J = 12.4$  Hz), 133.4 (d,  $J = 4.2$  Hz), 129.5, 129.0 (d,  $J = 11.5$  Hz), 124.7 (d,  $J = 9.6$  Hz), 123.1 (d,  $J = 9.7$  Hz), 113.9, 112.3 (d,  $J = 24$  Hz), 111.0 (d,  $J = 21.6$  Hz), 110.4 (d,  $J = 22.6$  Hz), 105.1 (d,  $J = 28.9$  Hz), 53.2, 52.0, 29.1;  $^{19}\text{F}$  NMR (376 MHz,  $\text{CDCl}_3$ )  $\delta$  -110.9, -117.0; IR:  $\nu_{\text{max}}(\text{KBr}) = 3314, 2960, 1706, 1639, 1598, 1535, 1471, 1365, 1323, 1274, 1208, 1148, 1104, 978, 929, 844, 805, 739, 695$   $\text{cm}^{-1}$ ; HRMS (ESI)  $m/z$ : calcd for  $\text{C}_{19}\text{H}_{16}\text{F}_2\text{IN}_3$   $[\text{M}+\text{H}]^+$ : 452.0430, found, 452.0420.

***N*-(*tert*-Butyl)-12-iodo-3,9-bis(trifluoromethyl)indolo[1,2-*c*]quinazolin-6-amine (3j)**

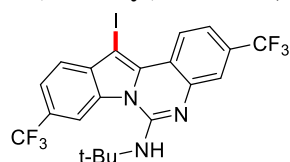

White solid (55%, 30.3 mg); mp: 238.5-239.5 °C; Isolation by column chromatography (petroleum ether);  $^1\text{H}$  NMR (400 MHz,  $\text{CDCl}_3$ )  $\delta$  9.32 (d,  $J = 8.4$  Hz, 1H), 8.26 (s, 1H), 7.86 – 7.77 (m, 2H), 7.71 (d,  $J = 8.5$  Hz, 1H), 7.51 (d,  $J = 8.4$  Hz, 1H), 5.16 (s, 1H), 1.72 (s, 9H);  $^{13}\text{C}$  NMR (100 MHz,  $\text{CDCl}_3$ )  $\delta$  143.9, 141.9, 135.3, 134.5, 131.8 (q,  $J = 30.9$  Hz), 124.5 (q,  $J = 270.4$  Hz), 129.0, 125.3 (q,  $J = 32.5$  Hz), 123.9 (q,  $J = 271.0$  Hz), 124.0, 123.1, 122.7 (q,  $J = 4$  Hz), 120.6 (q,  $J = 3$  Hz), 119.3, 118.7 (q,  $J = 3.6$  Hz), 110.4 (q,  $J = 4.8$  Hz), 54.4, 53.6, 29.0;  $^{19}\text{F}$  NMR (376 MHz,  $\text{CDCl}_3$ )  $\delta$  -60.8, -62.7; IR:  $\nu_{\text{max}}(\text{KBr}) = 2830, 1625, 1537, 1366, 1329, 1267, 1203, 1162, 1111, 893, 809, 757, 701$   $\text{cm}^{-1}$ ; HRMS (ESI)  $m/z$ : calcd for  $\text{C}_{21}\text{H}_{16}\text{F}_6\text{IN}_3$   $[\text{M}+\text{H}]^+$ : 552.0290, found 552.0295.

***N*-(*tert*-Butyl)-3,9-dichloro-12-iodoindolo[1,2-*c*]quinazolin-6-amine (3k)**

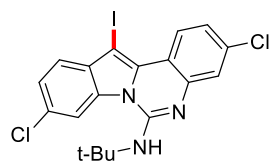

White solid (47%, 22.7 mg); mp: 201.2-202.2 °C; Isolation by column chromatography (petroleum ether);  $^1\text{H}$  NMR (400 MHz,  $\text{CDCl}_3$ )  $\delta$  9.11 (d,  $J = 8.7$  Hz, 1H), 7.91 (s, 1H), 7.60 (d,  $J = 8.6$  Hz, 1H), 7.55 (s, 1H), 7.43 (d,  $J = 8.5$  Hz, 1H), 7.23 (d,  $J = 6.9$  Hz, 1H), 5.07 (s, 1H), 1.69 (s, 9H);  $^{13}\text{C}$  NMR (100 MHz,  $\text{CDCl}_3$ )  $\delta$  143.9, 142.8, 135.3, 133.2, 131.6, 129.9, 128.8, 124.9, 124.4, 124.1, 123.0, 122.7, 115.6, 113.0, 53.4, 53.0, 29.1; IR:  $\nu_{\text{max}}(\text{KBr}) = 2963, 2357, 1623, 1593, 1541, 1452, 1330, 1266, 1198, 1085, 1028, 943, 870, 802, 754, 677$ ; HRMS (ESI)  $m/z$ : calcd for  $\text{C}_{19}\text{H}_{16}\text{Cl}_2\text{IN}_3$   $[\text{M}-\text{H}]^-$ : 481.9694 (100%), 483.9662 (63.9%), found 481.9693 (100%), 483.9664 (63.9%).

***N*-(*tert*-Butyl)-12-iodo-3,9-dimethylindolo[1,2-*c*]quinazolin-6-amine (3l)**

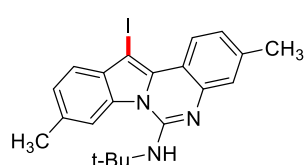

White solid (50%, 22.2 mg); mp: 170.0-170.6 °C; Isolation by column chromatography (petroleum ether);  $^1\text{H}$  NMR (400 MHz,  $\text{CDCl}_3$ )  $\delta$  9.12 (d,  $J = 8.2$  Hz, 1H), 7.71 (s, 1H), 7.57 (d,  $J = 8.1$  Hz, 1H), 7.38 (s, 1H), 7.27 (d,  $J = 8.4$  Hz, 1H), 7.12 (d,  $J = 8.2$  Hz, 1H), 5.23 (s, 1H), 2.58 (s, 3H), 2.46 (s, 3H), 1.70 (s, 9H);  $^{13}\text{C}$  NMR (100 MHz,  $\text{CDCl}_3$ )  $\delta$  143.9, 141.8, 139.6, 133.0, 132.6, 131.2, 130.3, 125.4, 125.1, 123.7, 123.0, 121.7, 115.0, 113.0, 52.9, 52.0, 29.3, 22.3, 21.5; IR:  $\nu_{\text{max}}(\text{KBr}) = 3300, 2961, 1714, 1600, 1539, 1458, 1369, 1322, 1212, 1166, 1030, 873, 796, 754, 703$   $\text{cm}^{-1}$ ; HRMS (ESI) Calcd for  $\text{C}_{21}\text{H}_{22}\text{IN}_3$   $[\text{M}+\text{H}]^+$ : 444.0931, found 444.0928.

***N*-(*tert*-Butyl)-4,8-dichloro-12-iodoindolo[1,2-*c*]quinazolin-6-amine (3m)**

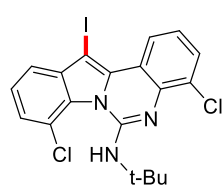

Yellow solid (60%, ), mp: 183.5-184.4 °C, Isolation by column chromatography (petroleum ether);  $^1\text{H}$  NMR (400 MHz,  $\text{CDCl}_3$ )  $\delta$  8.92 (d,  $J = 8.1$  Hz, 1H), 7.61 (d,  $J = 7.5$  Hz, 1H), 7.56 (d,  $J = 7.8$  Hz, 1H), 7.47 – 7.36 (m, 2H), 7.10 (t,  $J = 7.9$  Hz, 1H), 5.71 (s, 1H), 1.68 (s, 9H);  $^{13}\text{C}$  NMR (100 MHz,  $\text{CDCl}_3$ )  $\delta$  143.3, 140.1, 137.1, 136.6, 130.4, 128.9, 127.8, 126.2, 125.3, 122.1, 121.4, 121.1, 118.7, 118.4,

55.9, 53.7, 28.6; IR:  $\nu_{\max}$ (KBr) = 3447, 2968, 2923, 2308, 1837, 1744, 1688, 1620, 1524, 1462, 1402, 1327, 1272, 1200, 1124, 925, 752  $\text{cm}^{-1}$ ; HRMS (ESI)  $m/z$ : calcd for  $\text{C}_{19}\text{H}_{16}\text{Cl}_2\text{IN}_3$  [ $\text{M}-\text{H}$ ] $^-$ : 481.9692 (100%), 483.9661 (63.9%) found 481.9693 (100%), 483.9664 (63.9%).

#### ***N*-(*tert*-Butyl)-2,3,9,10-tetrafluoro-12-iodoindolo[1,2-*c*]quinazolin-6-amine (3n)**

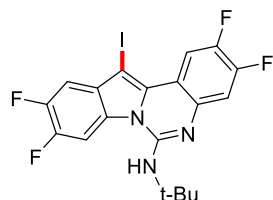

Brown solid (36%, 17.5 mg); mp: 216.5-217.5 °C; Isolation by column chromatography (petroleum ether);  $^1\text{H}$  NMR (400 MHz,  $\text{CDCl}_3$ )  $\delta$  9.06 – 8.92 (m, 1H), 7.81 (dd,  $J$  = 11.0, 6.4 Hz, 1H), 7.46 (dd,  $J$  = 10.1, 7.9 Hz, 1H), 7.32 (dd,  $J$  = 11.4, 7.8 Hz, 1H), 4.86 (s, 1H), 1.67 (s, 9H);  $^{13}\text{C}$  NMR (100 MHz,  $\text{CDCl}_3$ )  $\delta$  151.4 (dd,  $J$  = 14.3, 250.6 Hz), 148.7 (dd,  $J$  = 223.5, 14.2 Hz), 147.7 (dd,  $J$  = 242.5, 14.5 Hz), 146.3 (dd,  $J$  = 13.5, 221.6 Hz), 143.4, 139.1 (dd,  $J$  = 1.5, 10.2 Hz), 133.5 (dd,  $J$  = 2.5, 5.2 Hz), 130.8, 129.5 (d,  $J$  = 8.1 Hz), 128.8, 124.3 (d,  $J$  = 9.3 Hz), 113.3 (d,  $J$  = 17.4 Hz), 110.6 (d,  $J$  = 21.5 Hz), 109.2 (d,  $J$  = 0.3 Hz), 102.2 (d,  $J$  = 24.5 Hz), 53.4, 52.0, 29.2;  $^{19}\text{F}$  NMR (376 MHz,  $\text{CDCl}_3$ )  $\delta$  -133.7, -139.2, -139.8, -141.4; IR:  $\nu_{\max}$ (KBr) = 1711, 1533, 1477, 1376, 1328, 863, 751  $\text{cm}^{-1}$ ; HRMS (ESI)  $m/z$ : calcd for  $\text{C}_{19}\text{H}_{14}\text{F}_4\text{IN}_3$  [ $\text{M}+\text{H}$ ] $^+$ : 488.0241, found 488.0235.

#### ***N*-(*tert*-Butyl)-2,10-dichloro-4,8-difluoro-12-iodoindolo[1,2-*c*]quinazolin-6-amine (3o)**

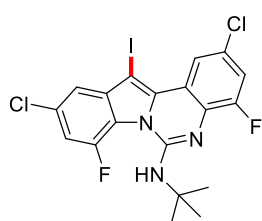

White solid (31%, 16.1 mg); mp: 240.6-240.8 °C; Isolation by column chromatography (petroleum ether);  $^1\text{H}$  NMR (400 MHz,  $\text{CDCl}_3$ )  $\delta$  8.93 (s, 1H), 7.51 (s, 1H), 7.24 – 7.17 (m, 2H), 6.63 (d,  $J$  = 29.4 Hz, 1H), 1.65 (s, 9H);  $^{13}\text{C}$  NMR (100 MHz,  $\text{CDCl}_3$ )  $\delta$  155.8 (d,  $J$  = 252.2 Hz), 147.8 (d,  $J$  = 242.4 Hz), 141.9, 137.1 (d,  $J$  = 4.2 Hz), 134.5 (d,  $J$  = 3.2 Hz), 130.7 (d,  $J$  = 11.9 Hz), 129.7 (d,  $J$  = 11.8 Hz), 125.9 (d,  $J$  = 9.9 Hz), 118.8 (d,  $J$  = 3.2 Hz), 118.7 (d,  $J$  = 4.1 Hz), 118.1 (d,  $J$  = 3.6 Hz), 116.7 (d,  $J$  = 22.1 Hz), 116.0 (d,  $J$  = 7.5 Hz), 111.5 (d,  $J$  = 30.8 Hz), 55.1, 53.4, 28.6;  $^{19}\text{F}$  NMR (376 MHz,  $\text{CDCl}_3$ )  $\delta$  -110.4, -124.6; IR:  $\nu_{\max}$ (KBr) = 3341, 2961, 1616, 1536, 1473, 1386, 1349, 1265, 1207, 912, 837, 756  $\text{cm}^{-1}$ ; HRMS (ESI)  $m/z$ : calcd for  $\text{C}_{19}\text{H}_{14}\text{Cl}_2\text{F}_2\text{IN}_3$  [ $\text{M}-\text{H}$ ] $^-$ : 517.9500 (100%), 519.9470 (63.9%), found, 517.9505 (100%), 519.9475 (63.9 %).

#### **12-Iodo-*N*-(2,4,4-trimethylpentan-2-yl)indolo[1,2-*c*]quinazolin-6-amine (3aa)**

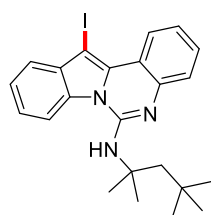

White solid (76%, 35.8 mg); mp: 153.4-154.4 °C; Isolation by column chromatography (petroleum ether);  $^1\text{H}$  NMR (400 MHz,  $\text{CDCl}_3$ )  $\delta$  9.30 (d,  $J$  = 9.2 Hz, 1H), 7.96 (d,  $J$  = 8.3 Hz, 1H), 7.76 (d,  $J$  = 8.5 Hz, 1H), 7.58 (d,  $J$  = 9.0 Hz, 1H), 7.50 (q,  $J$  = 7.4 Hz, 2H), 7.44 (d,  $J$  = 8.4 Hz, 1H), 7.31 (d,  $J$  = 15.2 Hz, 1H), 5.33 (s, 1H), 2.24 (s, 2H), 1.74 (s, 6H), 1.04 (s, 9H);  $^{13}\text{C}$  NMR (100 MHz,  $\text{CDCl}_3$ )  $\delta$  143.5, 141.9, 133.4, 133.2, 129.9, 129.6, 125.4, 123.6, 123.3, 123.0, 122.4, 122.2, 117.2, 112.6, 56.8, 53.0, 50.4, 31.8, 31.6, 30.2; IR:  $\nu_{\max}$ (KBr) = 3389, 3320, 3257, 3049, 2954, 2832, 1715, 1629, 1563, 1368, 1317, 1211, 757  $\text{cm}^{-1}$ ; HRMS (ESI) Calcd for  $\text{C}_{23}\text{H}_{26}\text{IN}_3$  [ $\text{M}+\text{H}$ ] $^+$ : 472.1244, found 472.1239.

#### **12-Iodo-*N*-isopropylindolo[1,2-*c*]quinazolin-6-amine (3ab)**



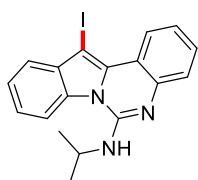

White solid (85%, 34.1 mg); mp: 166.6-167.6 °C; Isolation by column chromatography (petroleum ether/ethyl acetate: 30/1); <sup>1</sup>H NMR (400 MHz, CDCl<sub>3</sub>) δ 9.27 (d, *J* = 8.1 Hz, 1H), 7.94 (d, *J* = 8.3 Hz, 1H), 7.73 (d, *J* = 7.9 Hz, 1H), 7.57 (d, *J* = 8.0 Hz, 1H), 7.53 – 7.44 (m, 2H), 7.44 – 7.38 (m, 1H), 7.31 (t, *J* = 7.0 Hz, 1H), 5.17 (d, *J* = 6.2 Hz, 1H), 4.56 (dq, *J* = 13.0, 6.5 Hz, 1H), 1.46 (d, *J* = 6.5 Hz, 6H); <sup>13</sup>C NMR (100 MHz, CDCl<sub>3</sub>) δ 144.8, 142.2, 133.2, 133.1, 129.9, 129.7, 125.2, 123.7, 123.4, 123.0, 122.4, 122.3, 117.4, 112.9, 53.2, 43.8, 23.0; IR:  $\nu_{\max}$ (KBr) = 1676, 1535, 1376, 1324, 1217, 742 cm<sup>-1</sup>; HRMS (ESI) Calcd for C<sub>18</sub>H<sub>16</sub>IN<sub>3</sub> [M+H]<sup>+</sup>: 402.0462, found 402.0461.

#### ***N*-Butyl-12-iodoindolo[1,2-*c*]quinazolin-6-amine (3ac)**

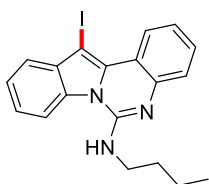

White solid (67%, 27.8 mg); mp: 160.1-160.7 °C; Isolation by column chromatography (petroleum ether/ethyl acetate: 30/1); <sup>1</sup>H NMR (400 MHz, CDCl<sub>3</sub>) δ 9.24 (d, *J* = 8.0 Hz, 1H), 7.89 (d, *J* = 8.2 Hz, 1H), 7.70 (d, *J* = 7.8 Hz, 1H), 7.56 (d, *J* = 7.9 Hz, 1H), 7.47 (dt, *J* = 15.4, 7.5 Hz, 2H), 7.38 (t, *J* = 7.5 Hz, 1H), 7.30 (t, *J* = 7.5 Hz, 1H), 5.23 (s, 1H), 3.70 (s, 2H), 1.91 – 1.71 (m, 2H), 1.56 (q, *J* = 7.4 Hz, 2H), 1.05 (t, *J* = 7.3 Hz, 3H); <sup>13</sup>C NMR (100 MHz, CDCl<sub>3</sub>) δ 145.6, 142.0, 133.2, 132.9, 129.9, 129.7, 125.1, 123.7, 123.4, 123.1, 122.5, 122.3, 117.4, 112.8, 53.4, 42.0, 31.5, 20.4, 13.9; IR:  $\nu_{\max}$ (KBr) = 1628, 1533, 1373, 1323, 743 cm<sup>-1</sup>; HRMS (ESI) Calcd for C<sub>19</sub>H<sub>18</sub>IN<sub>3</sub> [M+H]<sup>+</sup>: 416.0618, found 416.0615.

#### ***N*-Benzyl-12-iodoindolo[1,2-*c*]quinazolin-6-amine (3ad)**

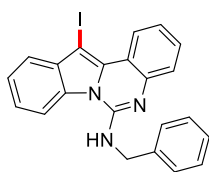

White solid (50%, 22.5 mg); mp: 162.5-163.2 °C; Isolation by column chromatography (petroleum ether/ethyl acetate: 30/1); <sup>1</sup>H NMR (400 MHz, CDCl<sub>3</sub>) δ 9.28 (d, *J* = 9.0 Hz, 1H), 7.88 (d, *J* = 8.4 Hz, 1H), 7.71 (d, *J* = 7.6 Hz, 1H), 7.60 (d, *J* = 8.0 Hz, 1H), 7.53 (t, *J* = 7.9 Hz, 3H), 7.47 – 7.39 (m, 3H), 7.38 – 7.30 (m, 3H), 5.56 (s, 1H), 4.93 (s, 2H); <sup>13</sup>C NMR (100 MHz, CDCl<sub>3</sub>) δ 145.3, 141.7, 138.2, 133.2, 132.9, 129.9, 129.8, 128.8, 128.1, 127.7, 125.2, 123.8, 123.4, 123.3, 122.8, 122.3, 117.7, 112.9, 46.5; IR:  $\nu_{\max}$ (KBr) = 1667, 1537, 1324, 746 cm<sup>-1</sup>; HRMS (ESI) *m/z*: calcd for C<sub>21</sub>H<sub>20</sub>IN<sub>3</sub> [M+H]<sup>+</sup>: 450.0462, found 450.0454.

#### ***N*-((3*s*,5*s*,7*s*)-Adamantan-1-yl)-12-iodoindolo[1,2-*c*]quinazolin-6-amine (3ae)**

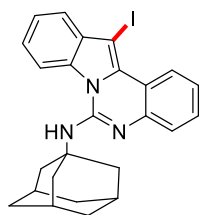

White solid (81%, 39.9 mg); mp: 228.5-229.5 °C; Isolation by column chromatography (petroleum ether); <sup>1</sup>H NMR (400 MHz, CDCl<sub>3</sub>) δ 9.28 (d, *J* = 8.0 Hz, 1H), 7.94 (d, *J* = 8.3 Hz, 1H), 7.72 (d, *J* = 7.9 Hz, 1H), 7.56 (d, *J* = 7.9 Hz, 1H), 7.47 (dt, *J* = 14.6, 7.5 Hz, 2H), 7.37 (t, *J* = 7.6 Hz, 1H), 7.28 (dd, *J* = 13.6, 6.3 Hz, 1H), 5.19 (s, 1H), 2.40 (s, 6H), 2.22 (s, 3H), 1.81 (s, 5H); <sup>13</sup>C NMR (100 MHz, CDCl<sub>3</sub>) δ 143.3, 141.9, 133.3, 133.2, 130.0, 129.6, 125.3, 123.5, 123.3, 122.8, 122.3, 122.2, 117.3, 112.9, 53.6, 52.9, 42.2, 36.6, 29.7; IR:  $\nu_{\max}$ (KBr) = 2901, 2834, 1710, 1621, 1537, 1364, 1313, 1210, 727 cm<sup>-1</sup>; HRMS (ESI) Calcd for C<sub>25</sub>H<sub>24</sub>IN<sub>3</sub> [M+H]<sup>+</sup>: 494.1088, found 494.1083.

#### ***N*-Cyclopentyl-12-iodoindolo[1,2-*c*]quinazolin-6-amine (3af)**

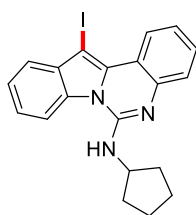

White solid (69%, 29.5 mg); mp: 149.7-150.7 °C; Isolation by column chromatography (petroleum ether/ethyl acetate: 30/1);  $^1\text{H}$  NMR (400 MHz,  $\text{CDCl}_3$ )  $\delta$  9.27 (d,  $J = 8.1$  Hz, 1H), 7.93 (d,  $J = 8.2$  Hz, 1H), 7.73 (d,  $J = 8.0$  Hz, 1H), 7.58 (d,  $J = 8.0$  Hz, 1H), 7.49 (q,  $J = 8.0, 7.5$  Hz, 2H), 7.41 (t,  $J = 8.3$  Hz, 1H), 7.31 (t,  $J = 7.6$  Hz, 1H), 5.31 (s, 1H), 4.64 (s, 1H), 2.29 (dd,  $J = 11.7, 5.8$  Hz, 2H), 1.92 – 1.59 (m, 7H);  $^{13}\text{C}$  NMR (100 MHz,  $\text{CDCl}_3$ )  $\delta$  133.3, 133.0, 130.0, 129.7, 125.2, 123.7, 123.4, 123.1, 122.5, 122.3, 117.4, 112.8, 53.8, 33.5, 23.9; IR:  $\nu_{\text{max}}(\text{KBr}) = 2856, 2809, 1652, 1525, 1389, 1340, 801, 756$   $\text{cm}^{-1}$ ; HRMS (ESI) Calcd for  $\text{C}_{20}\text{H}_{18}\text{IN}_3$   $[\text{M}+\text{H}]^+$ : 428.0618, found 428.0617.

#### ***N*-Cyclohexyl-12-iodoindolo[1,2-*c*]quinazolin-6-amine (3ag)**

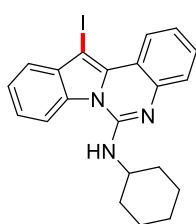

White solid (74%, 32.6 mg); mp: 177.6-178.6 °C, Isolation by column chromatography (petroleum ether/ethyl acetate: 30/1);  $^1\text{H}$  NMR (400 MHz,  $\text{CDCl}_3$ )  $\delta$  9.27 (d,  $J = 8.1$  Hz, 1H), 7.94 (d,  $J = 8.2$  Hz, 1H), 7.73 (d,  $J = 7.8$  Hz, 1H), 7.57 (d,  $J = 7.9$  Hz, 1H), 7.48 (q,  $J = 7.6$  Hz, 2H), 7.41 (t,  $J = 7.2$  Hz, 1H), 7.30 (t,  $J = 7.5$  Hz, 1H), 5.28 (s, 1H), 4.30 (s, 1H), 2.27 (d,  $J = 7.6$  Hz, 2H), 1.84 (d,  $J = 13.4$  Hz, 2H), 1.73 (d,  $J = 9.0$  Hz, 1H), 1.57 (q,  $J = 11.3$  Hz, 2H), 1.44 (q,  $J = 9.7$  Hz, 2H), 1.34 (d,  $J = 9.3$  Hz, 1H);  $^{13}\text{C}$  NMR (100 MHz,  $\text{CDCl}_3$ )  $\delta$  144.7, 133.3, 130.0, 129.7, 125.1, 123.7, 123.4, 123.1, 122.3, 117.4, 112.9, 50.2, 33.2, 25.8, 24.8; IR:  $\nu_{\text{max}}(\text{KBr}) = 2924, 2853, 1605, 1525, 1451, 1341, 1214, 1083, 746$   $\text{cm}^{-1}$ ; HRMS (ESI) Calcd for  $\text{C}_{21}\text{H}_{20}\text{IN}_3$   $[\text{M}+\text{H}]^+$ : 442.0775, found 442.0775.

#### ***N*-(*tert*-Butyl)-12-((trimethylsilyl)ethynyl)indolo[1,2-*c*]quinazolin-6-amine (4)**

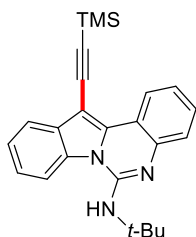

Brown solid (92%, 35.4 mg); mp: 221.2-222.2 °C; Isolation by column chromatography (petroleum ether);  $^1\text{H}$  NMR (400 MHz,  $\text{CDCl}_3$ )  $\delta$  9.09 (d,  $J = 7.5$  Hz, 1H), 7.94 (dd,  $J = 16.8, 8.1$  Hz, 2H), 7.58 (d,  $J = 7.8$  Hz, 1H), 7.49 (dt,  $J = 14.4, 7.8$  Hz, 2H), 7.39 (t,  $J = 7.6$  Hz, 1H), 7.29 (dd,  $J = 15.4, 8.4$  Hz, 1H), 5.28 (s, 1H), 1.71 (s, 9H), 0.41 (s, 7H);  $^{13}\text{C}$  NMR (100 MHz,  $\text{CDCl}_3$ )  $\delta$  143.8, 141.7, 138.1, 131.6, 129.8, 129.1, 125.1, 124.0, 123.5, 122.8, 122.7, 120.4, 117.9, 112.8, 101.7, 99.5, 92.0, 52.9, 29.2, 1.0; IR:  $\nu_{\text{max}}(\text{KBr}) = 2961, 2139, 1609, 1554, 1452, 1391, 1335, 1261, 1207, 848, 753$   $\text{cm}^{-1}$ ; HRMS (ESI)  $m/z$ : calcd for  $\text{C}_{24}\text{H}_{28}\text{N}_3\text{Si}$   $[\text{M}+\text{H}]^+$ : 386.2044, found 386.2039.

#### ***N*-(*tert*-Butyl)-12-ethynylindolo[1,2-*c*]quinazolin-6-amine (5)**

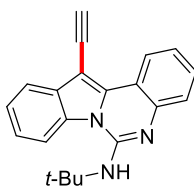

Yellow solid (98%, 30.6 mg); mp: 163.7-164.2 °C; Isolation by column chromatography (petroleum ether);  $^1\text{H}$  NMR (400 MHz,  $\text{CDCl}_3$ )  $\delta$  9.04 (d,  $J = 9.1$  Hz, 1H), 7.95 (t,  $J = 8.3$  Hz, 2H), 7.57 (d,  $J = 8.1$  Hz, 1H), 7.53 – 7.43 (m, 2H), 7.39 (t,  $J = 8.4$  Hz, 1H), 7.28 (d,  $J = 6.9$  Hz, 1H), 5.29 (s, 1H), 3.75 (s, 1H), 1.71 (s, 9H);  $^{13}\text{C}$  NMR (100 MHz,  $\text{CDCl}_3$ )  $\delta$  143.8, 141.7, 138.3, 131.8, 129.9, 129.1, 125.2, 123.9, 123.5, 123.0, 122.8, 120.1, 117.6, 112.8, 90.6, 84.3, 78.2, 77.3, 77.0, 76.6, 53.0, 29.2; IR:  $\nu_{\text{max}}(\text{KBr}) = 3930, 3814, 3771, 3713, 3442, 3360, 3255, 3182, 2957, 2921, 2850, 2781, 2712, 2666, 2604, 2432, 2089, 1654, 1608, 1556, 1461, 1391, 1323, 1248, 1200, 1122, 1078, 1025, 965, 804, 735, 606$   $\text{cm}^{-1}$ ; HRMS (ESI)  $m/z$ : calcd for  $\text{C}_{21}\text{H}_{19}\text{N}_3$   $[\text{M}+\text{H}]^+$ : 314.1652, found 314.1643.

#### **12-Iodoindolo[1,2-*c*]quinazolin-6-amine (6)**

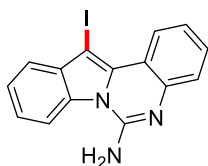

White solid (40%, 14.3 mg); mp: 234.8-235.8 °C, Isolation by column chromatography (petroleum ether/ethyl acetate: 5/1); <sup>1</sup>H NMR (400 MHz, DMSO-*d*<sub>6</sub>) δ 8.37 (d, *J* = 8.1 Hz, 1H), 8.10 (d, *J* = 8.5 Hz, 1H), 7.80 (d, *J* = 8.1 Hz, 1H), 7.46 – 7.31 (m, 5H), 7.23 (t, *J* = 7.4 Hz, 1H), 7.12 (s, 1H); <sup>13</sup>C NMR (100 MHz, DMSO-*d*<sub>6</sub>) δ 146.5, 135.1, 129.4, 128.6, 122.5, 122.5, 122.2, 121.0, 119.5, 114.4, 94.8; IR:  $\nu_{\max}$ (KBr) = 2830, 1628, 1548, 1367, 1319, 755 cm<sup>-1</sup>; HRMS (ESI) *m/z*: calcd for C<sub>15</sub>H<sub>11</sub>IN<sub>3</sub> [M+H]<sup>+</sup>: 359.9992, found 359.9992.

**(*E*)-*N*-(*tert*-Butyl)-12-styrylindolo[1,2-*c*]quinazolin-6-amine (7)**

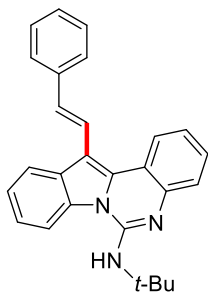

Brown solid (88%, 34.4 mg); mp : 151.5-152.5 °C, Isolation by column chromatography (petroleum ether); <sup>1</sup>H NMR (400 MHz, CDCl<sub>3</sub>) δ 8.27 (d, *J* = 7.8 Hz, 1H), 8.21 (d, *J* = 7.8 Hz, 1H), 8.07 (d, *J* = 8.3 Hz, 1H), 7.80 – 7.68 (m, 3H), 7.64 (d, *J* = 8.0 Hz, 1H), 7.49 (dt, *J* = 19.5, 7.2 Hz, 5H), 7.39 (t, *J* = 7.4 Hz, 1H), 7.34 – 7.25 (m, 2H), 5.36 (s, 1H), 1.79 (s, 9H); <sup>13</sup>C NMR (100 MHz, CDCl<sub>3</sub>) δ 144.1, 142.1, 138.0, 132.8, 131.9, 129.9, 129.5, 128.8, 128.7, 127.3, 126.1, 125.3, 124.6, 123.1, 123.0, 122.2, 121.4, 120.2, 118.6, 112.9, 109.3, 52.8, 29.2; IR:  $\nu_{\max}$ (KBr) = 2829, 1697, 1625, 1547, 1368, 1324, 1268, 755 cm<sup>-1</sup>; HRMS (ESI) *m/z*: calcd for C<sub>27</sub>H<sub>25</sub>N<sub>3</sub> [M+H]<sup>+</sup>: 392.2043, found 392.2042.

***N*-(*tert*-Butyl)indolo[1,2-*c*]quinazolin-6-amine (8)**

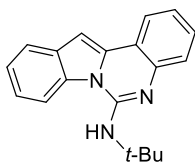

White solid (87%, 25.1 mg); mp: 126.9-127.3 °C, Isolation by column chromatography (petroleum ether); <sup>1</sup>H NMR (400 MHz, CDCl<sub>3</sub>) δ 7.96 (dd, *J* = 13.2, 8.0 Hz, 2H), 7.83 (d, *J* = 7.4 Hz, 1H), 7.55 (d, *J* = 8.0 Hz, 1H), 7.47 – 7.31 (m, 3H), 7.28 – 7.20 (m, 1H), 7.15 (s, 1H), 5.32 (s, 1H), 1.72 (s, 9H); <sup>13</sup>C NMR (100 MHz, CDCl<sub>3</sub>) δ 144.1, 141.0, 136.8, 130.8, 130.2, 128.9, 125.3, 122.9, 122.8, 122.6, 121.3, 120.9, 117.4, 112.8, 94.6, 52.7, 29.3; IR:  $\nu_{\max}$ (KBr) = 3428, 3057, 2960, 2922, 2364, 1619, 1556, 1513, 1473, 1447, 1390, 1361, 1331, 1272, 1240, 1198, 1118, 1023, 941, 914, 837, 786, 731, 646 cm<sup>-1</sup>; HRMS (ESI) *m/z*: calcd for C<sub>19</sub>H<sub>20</sub>N<sub>3</sub> [M+H]<sup>+</sup>: 290.1652, found 290.1648.

***N*-(*tert*-Butyl)-12-phenylindolo[1,2-*c*]quinazolin-6-amine (9)**

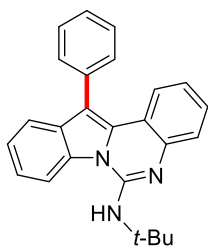

Brown solid (60%, 21.9 mg); mp : 208.1-208.9 °C, Isolation by column chromatography (petroleum ether); <sup>1</sup>H NMR (400 MHz, CDCl<sub>3</sub>) δ 8.02 (d, *J* = 7.0 Hz, 1H), 7.62 – 7.46 (m, 8H), 7.42 – 7.31 (m, 3H), 6.92 (t, *J* = 7.6 Hz, 1H), 5.34 (s, 1H), 1.73 (s, 9H); <sup>13</sup>C NMR (100 MHz, CDCl<sub>3</sub>) δ 144.2, 141.7, 135.0, 131.5, 130.9, 129.2, 128.9, 128.7, 127.5, 125.3, 123.5, 122.8, 122.4, 122.0, 119.7, 117.9, 112.7, 112.2, 52.8, 29.3; IR:  $\nu_{\max}$ (KBr) = 2831, 1609, 1360, 1268, 756 cm<sup>-1</sup>; HRMS (ESI) *m/z*: calcd for C<sub>25</sub>H<sub>24</sub>N<sub>3</sub> [M+H]<sup>+</sup>: 366.1965, found 366.1960.

***N*-(*tert*-Butyl)-12-(4-methoxyphenyl)indolo[1,2-*c*]quinazolin-6-amine (10)**

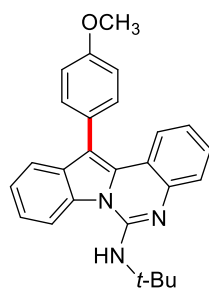

Brown solid (90%, 35.6 mg); mp: 159.8-160.7 °C, Isolation by column chromatography (petroleum ether);  $^1\text{H}$  NMR (400 MHz,  $\text{CDCl}_3$ )  $\delta$  8.04 (d,  $J = 8.5$  Hz, 1H), 7.63 (dd,  $J = 14.1, 8.5$  Hz, 2H), 7.56 (d,  $J = 8.0$  Hz, 1H), 7.50 (d,  $J = 8.6$  Hz, 2H), 7.38 (q,  $J = 9.1, 7.9$  Hz, 3H), 7.13 (d,  $J = 8.6$  Hz, 2H), 6.97 (t,  $J = 7.6$  Hz, 1H), 5.36 (s, 1H), 3.96 (s, 3H), 1.76 (s, 9H);  $^{13}\text{C}$  NMR (100 MHz,  $\text{CDCl}_3$ )  $\delta$  159.0, 144.2, 141.6, 131.9, 131.7, 131.5, 129.1, 128.5, 127.6, 126.9, 125.2, 123.4, 122.7, 122.4, 121.9, 119.6, 118.1, 114.4, 114.1, 112.7, 111.9, 55.3, 52.8, 29.3; IR:  $\nu_{\text{max}}(\text{KBr}) = 3299, 2960, 2830, 1566, 1509, 1455, 1362, 1241, 1110, 1032, 932, 830, 752, 607 \text{ cm}^{-1}$ ; HRMS (ESI)  $m/z$ : calcd for  $\text{C}_{26}\text{H}_{26}\text{N}_3$   $[\text{M}+\text{H}]^+$ : 396.2070, found 396.2062.

## I. X-ray Crystallographic Analysis for Product 3a

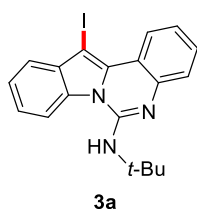

≡

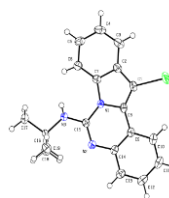

**CCDC: 2205149**

|                                 |                                                                                                                                                                                          |
|---------------------------------|------------------------------------------------------------------------------------------------------------------------------------------------------------------------------------------|
| Empirical formula               | $\text{C}_{19}\text{H}_{18}\text{IN}_3$                                                                                                                                                  |
| Formula weight                  | 415.26                                                                                                                                                                                   |
| Temperature                     | 150.0 K                                                                                                                                                                                  |
| Crystal system, space group     | Monoclinic, C2/c                                                                                                                                                                         |
| Unit cell dimensions            | $a = 21.6151 (11) \text{ \AA}$ $\alpha = 90 \text{ deg.}$<br>$b = 10.3343 (4) \text{ \AA}$ $\beta = 125.115 (3) \text{ deg}$<br>$c = 18.5855 (9) \text{ \AA}$ $\gamma = 90 \text{ deg.}$ |
| Volume                          | $3396.0 (3) \text{ \AA}^3$                                                                                                                                                               |
| Z, Calculated density           | 8, $1.624 \text{ g/cm}^3$                                                                                                                                                                |
| F(000)                          | 1648.0                                                                                                                                                                                   |
| Crystal size                    | $0.15 \times 0.08 \times 0.07 \text{ mm}^3$                                                                                                                                              |
| Theta range for data collection | 4.566 to 52.86 deg                                                                                                                                                                       |
| Limiting indices                | $-26 \leq h \leq 26, -12 \leq k \leq 12, -23 \leq l \leq 23$                                                                                                                             |
| Reflections collected / unique  | 19018 / 3460 [R(int) = 0.0366, R(sigma) = 0.0267]                                                                                                                                        |
| Completeness to theta = 26.430  | 99.3%                                                                                                                                                                                    |
| Data / restraints / parameters  | 3460/2/219                                                                                                                                                                               |
| Goodness-of-fit on $F^2$        | 1.022                                                                                                                                                                                    |

---

|                                      |                           |
|--------------------------------------|---------------------------|
| Final R indices [ $I > 2\sigma(I)$ ] | R1 = 0.0316, wR2 = 0.0644 |
| R indices (all data)                 | R1 = 0.0397, wR2 = 0.0700 |

---

## J. References

- [1] Kumar, K. S.; Ramulu, M. S.; Rajesham, B.; Kumar, N. P.; Voorab, V.; Kanchab, R. K. *Org. Biomol. Chem.* **2017**, *15*, 4468.
- [2] Reddy, B. V.; Swain, M.; Reddy, S. M.; Yadav, J. S.; Sridhar, B. *Eur. J. Org. Chem.*, **2014**, 3313-3318.

**K. Copies of  $^1\text{H}$ ,  $^{13}\text{C}$  and  $^{19}\text{F}$  NMR Spectra**  
***N*-(*tert*-Butyl)-12-iodoindolo[1,2-*c*]quinazolin-6-amine (3a)**

$^1\text{H}$  NMR (400MHz,  $\text{CDCl}_3$ ) of compound 3a

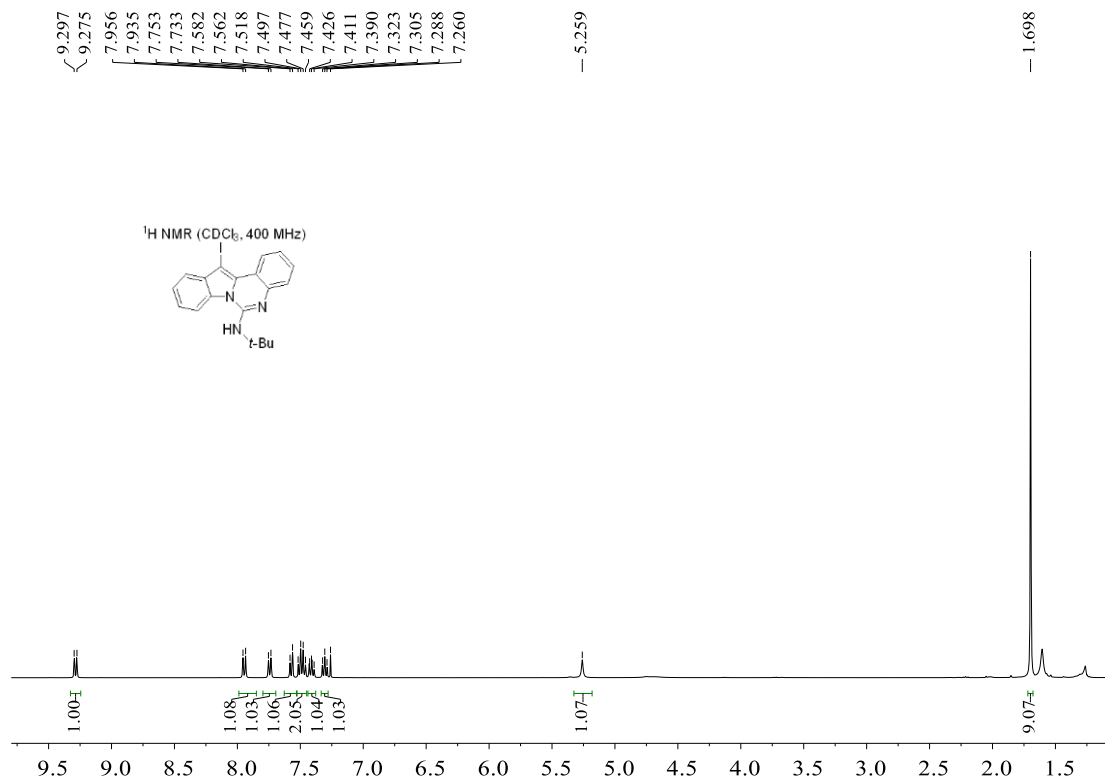

$^{13}\text{C}$  NMR (100 Mz,  $\text{CDCl}_3$ ) of compound 3a

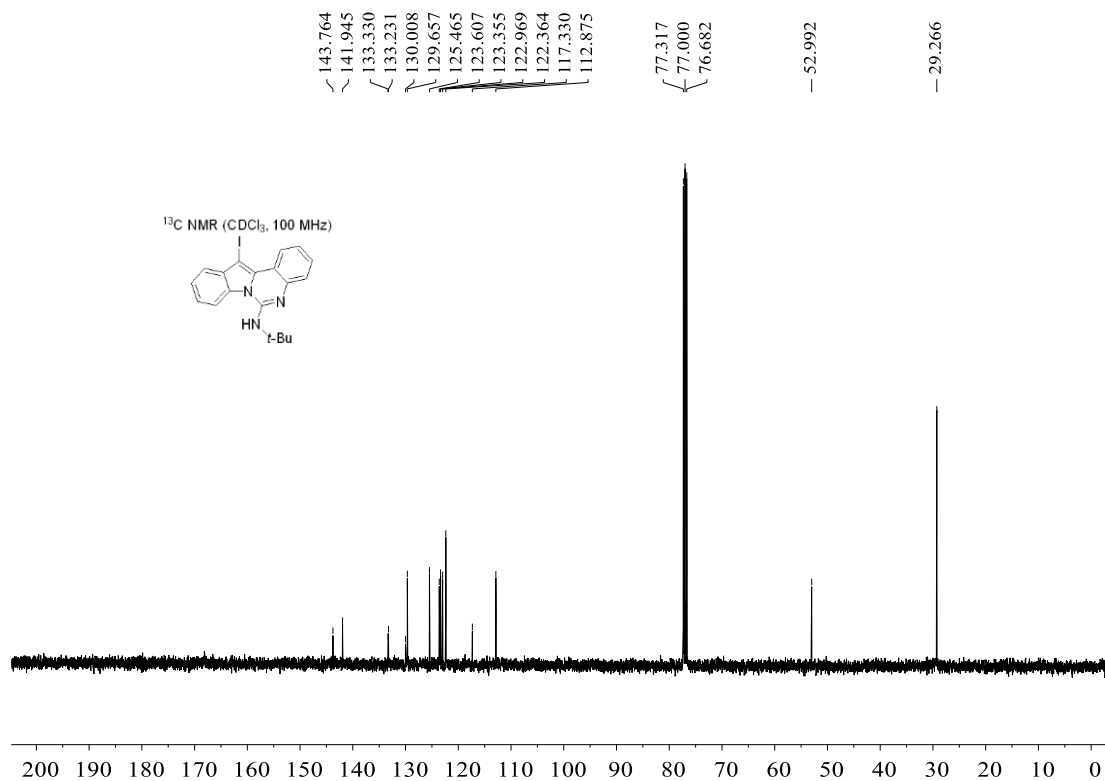

***N*-(*tert*-Butyl)-2,10-difluoro-12-iodoindolo[1,2-*c*]quinazolin-6-amine (3b)**

<sup>1</sup>H NMR (400 MHz, CDCl<sub>3</sub>) of compound of **3b**

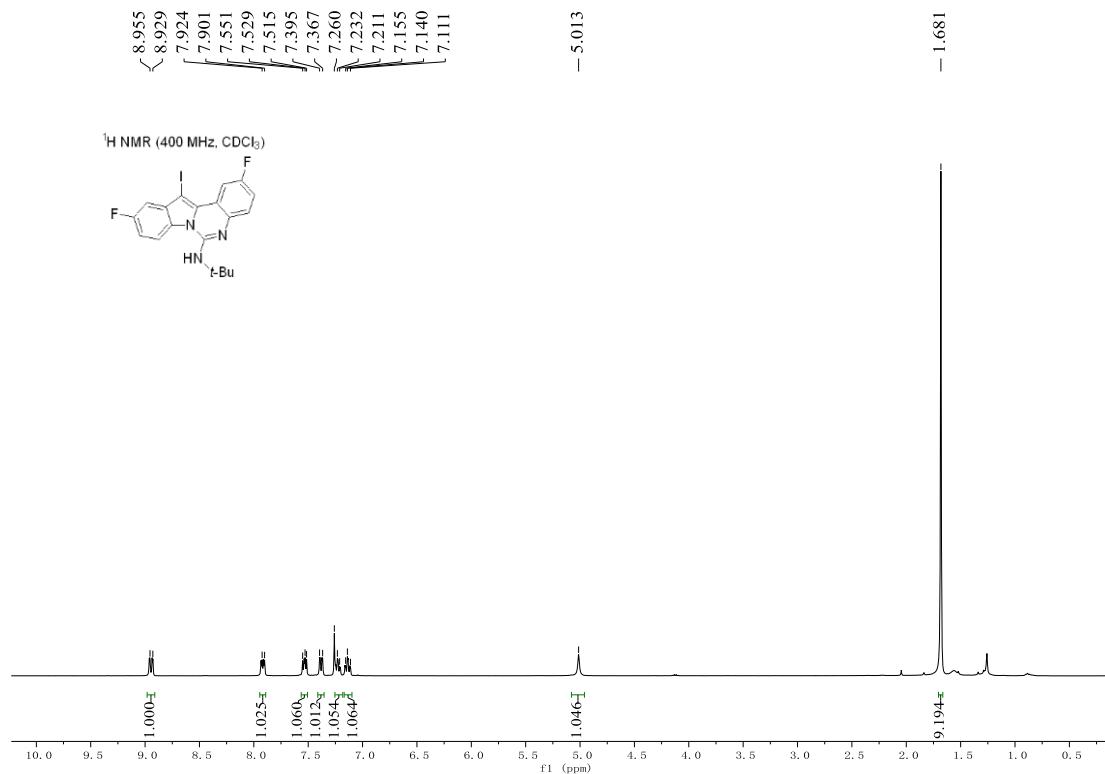

<sup>13</sup>C NMR (100 Mz, CDCl<sub>3</sub>) of compound **3b**

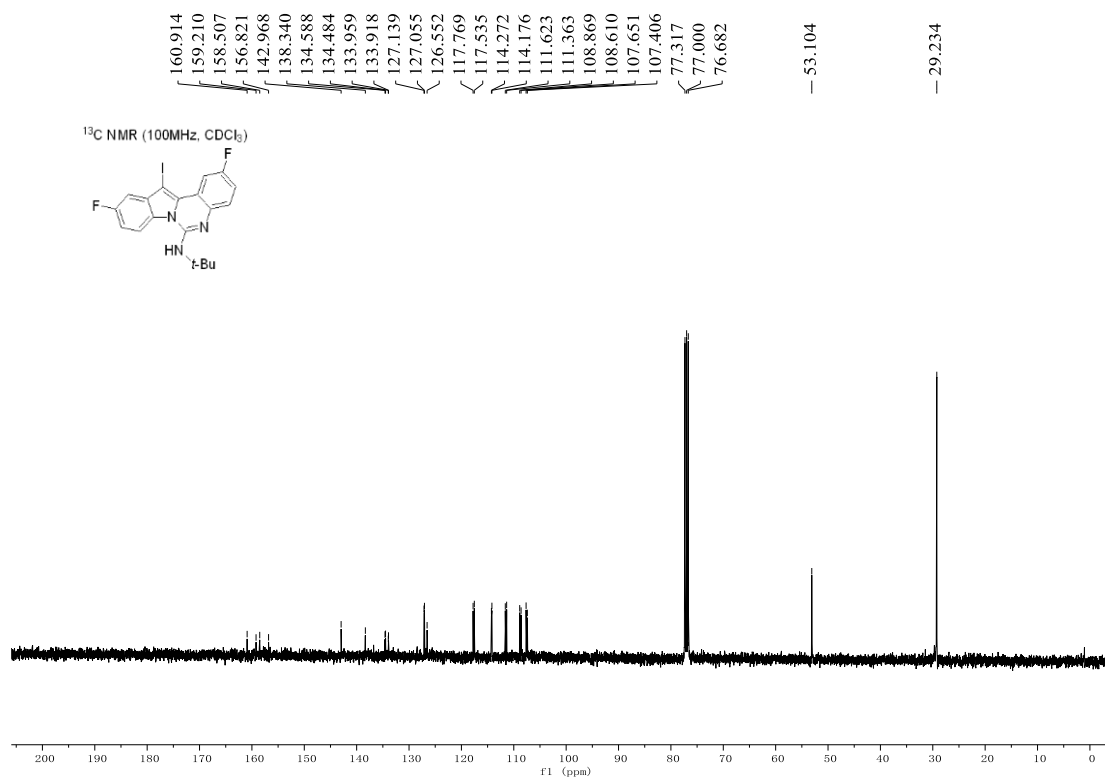

$^{19}\text{F}$  NMR (376 Mz,  $\text{CDCl}_3$ ) of compound **3b**

$\left\{ \begin{array}{l} -117.759 \\ -117.884 \end{array} \right.$

$^{19}\text{F}$  NMR (376 MHz,  $\text{CDCl}_3$ )

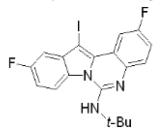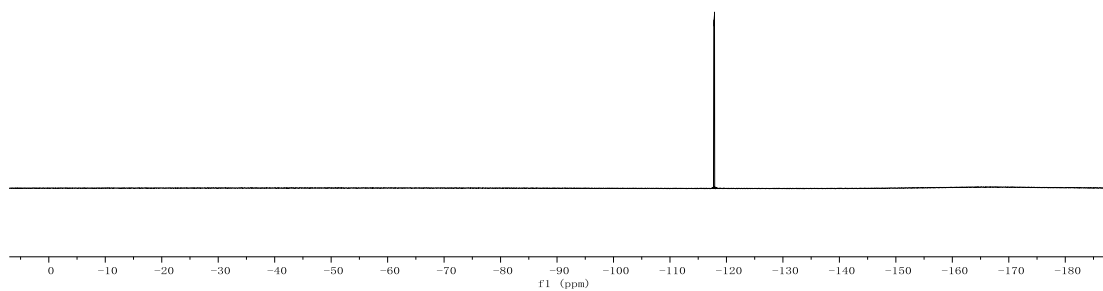

*N*-(*tert*-Butyl)-2,10-dichloro-12-iodoindolo[1,2-*c*]quinazolin-6-amine (**3c**)

$^1\text{H}$  NMR (400 MHz,  $\text{CDCl}_3$ ) of compound of **3c**

9.203  
7.858  
7.836  
7.690  
7.493  
7.472  
7.433  
7.416  
7.364  
7.342  
7.260  
5.086  
1.677

$^1\text{H}$  NMR (400 MHz,  $\text{CDCl}_3$ )

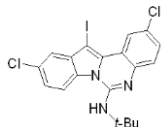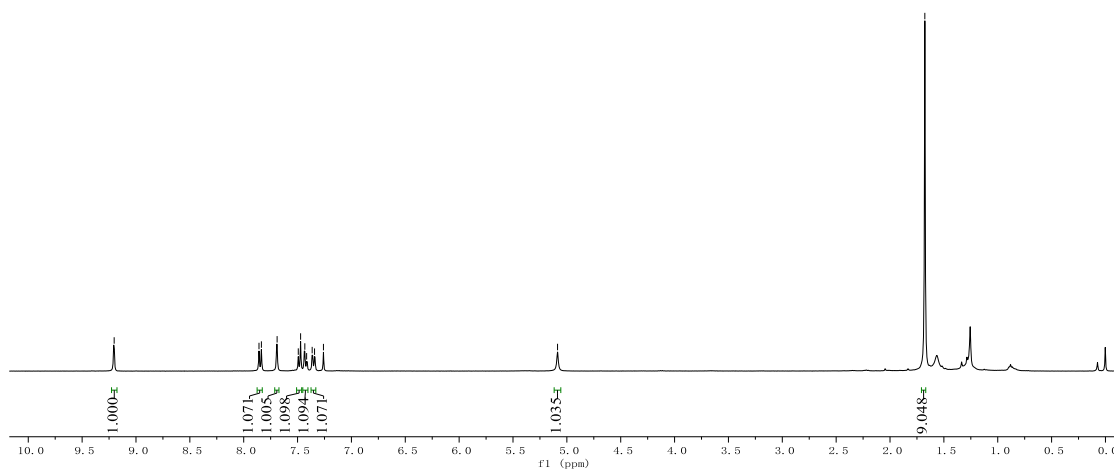



$^{13}\text{C}$  NMR (100 Mz,  $\text{CDCl}_3$ ) of compound **3c**

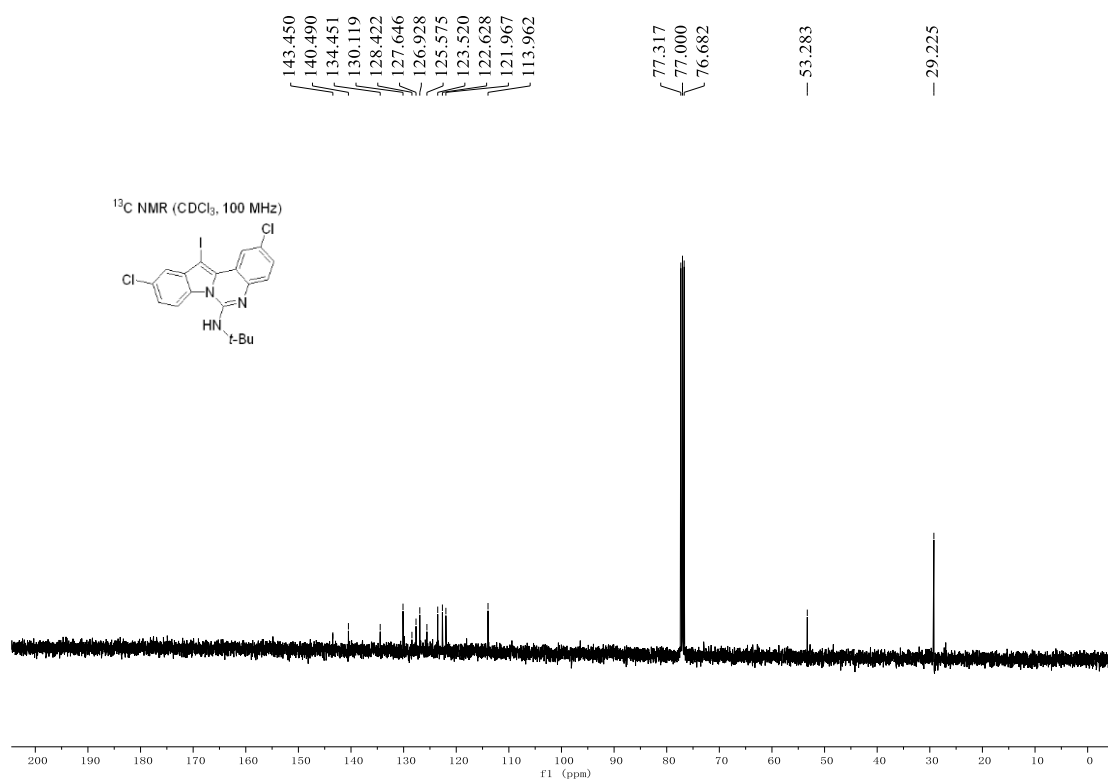

**2,10-Dibromo-*N*-(*tert*-butyl)-12-iodoindolo[1,2-*c*]quinazolin-6-amine (**3d**)**

$^1\text{H}$  NMR (400 MHz,  $\text{CDCl}_3$ ) of compound of **3d**

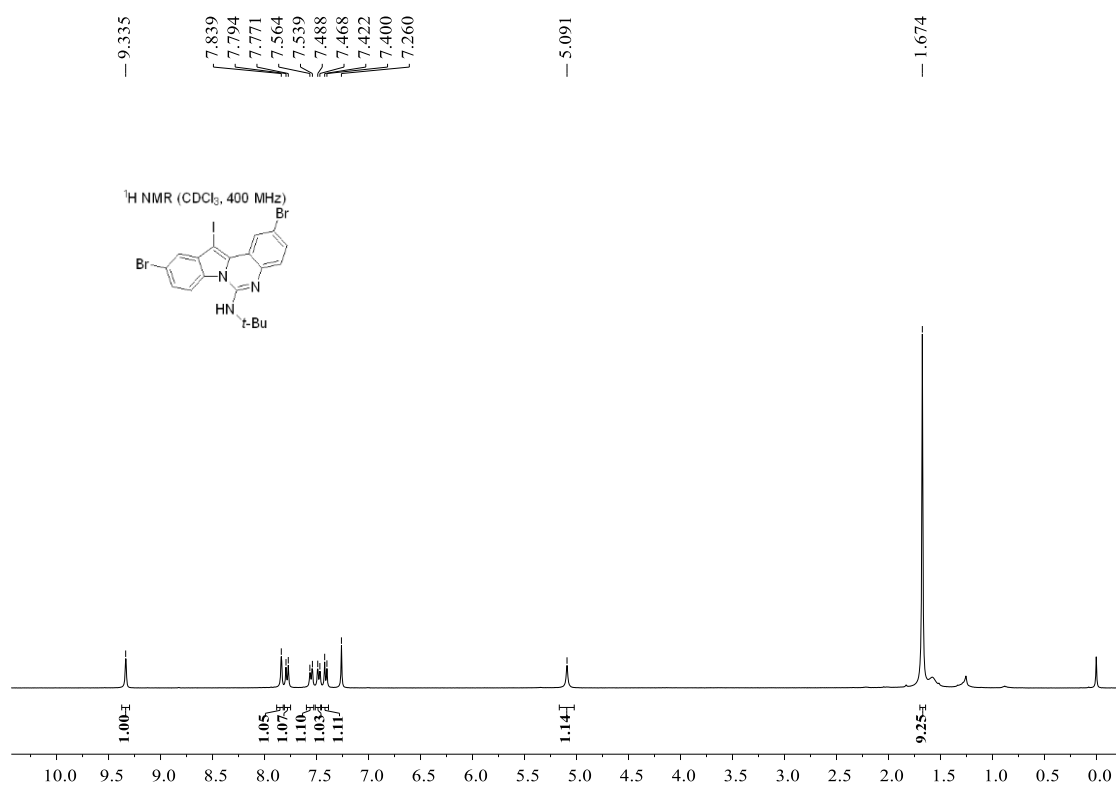

$^{13}\text{C}$  NMR (100 Mz,  $\text{CDCl}_3$ ) of compound **3d**

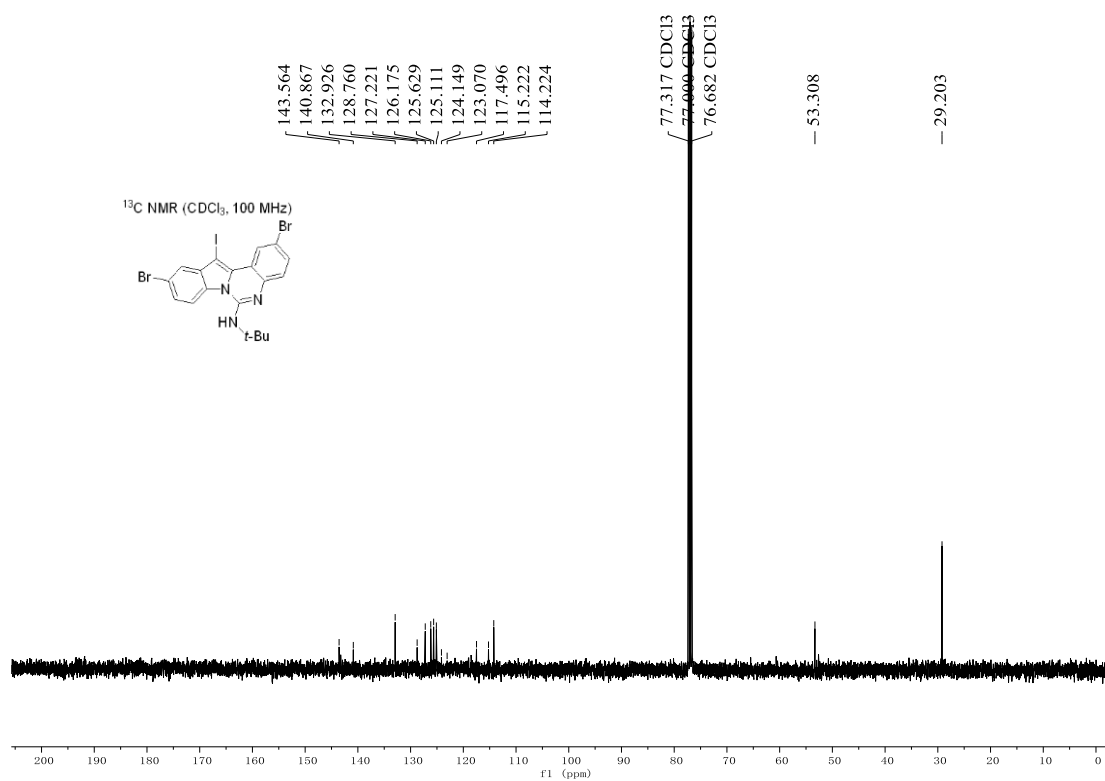

*N*-(*tert*-Butyl)-12-iodo-2,10-bis(trifluoromethyl)indolo[1,2-*c*]quinazolin-6-amine (**3e**)

$^1\text{H}$  NMR (400 MHz,  $\text{CDCl}_3$ ) of compound of **3e**

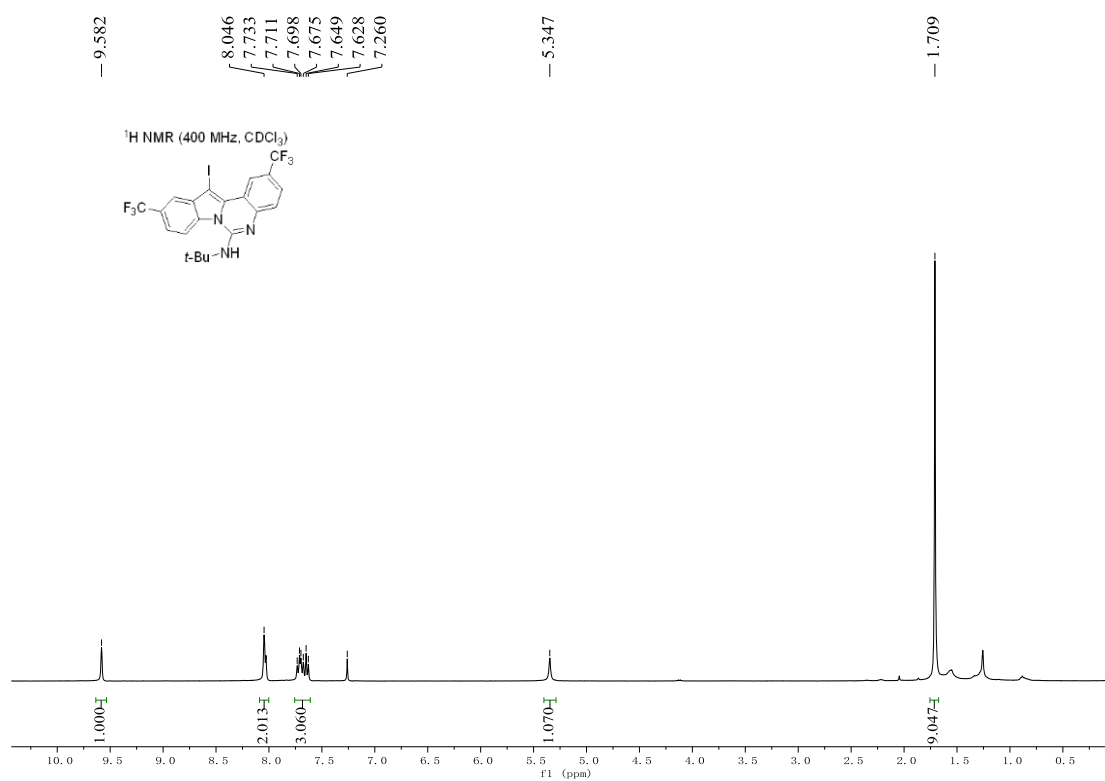

<sup>13</sup>C NMR (100 Mz, CDCl<sub>3</sub>) of compound **3e**

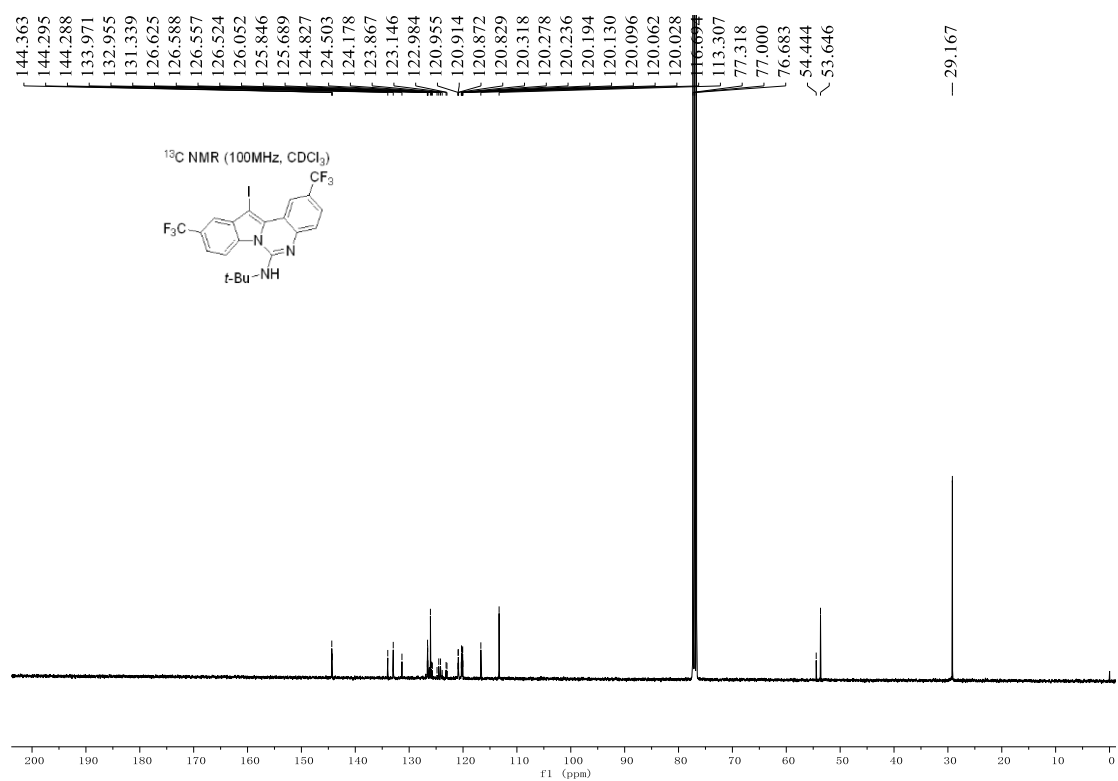

<sup>19</sup>F NMR (376 Mz, CDCl<sub>3</sub>) of compound **3e**

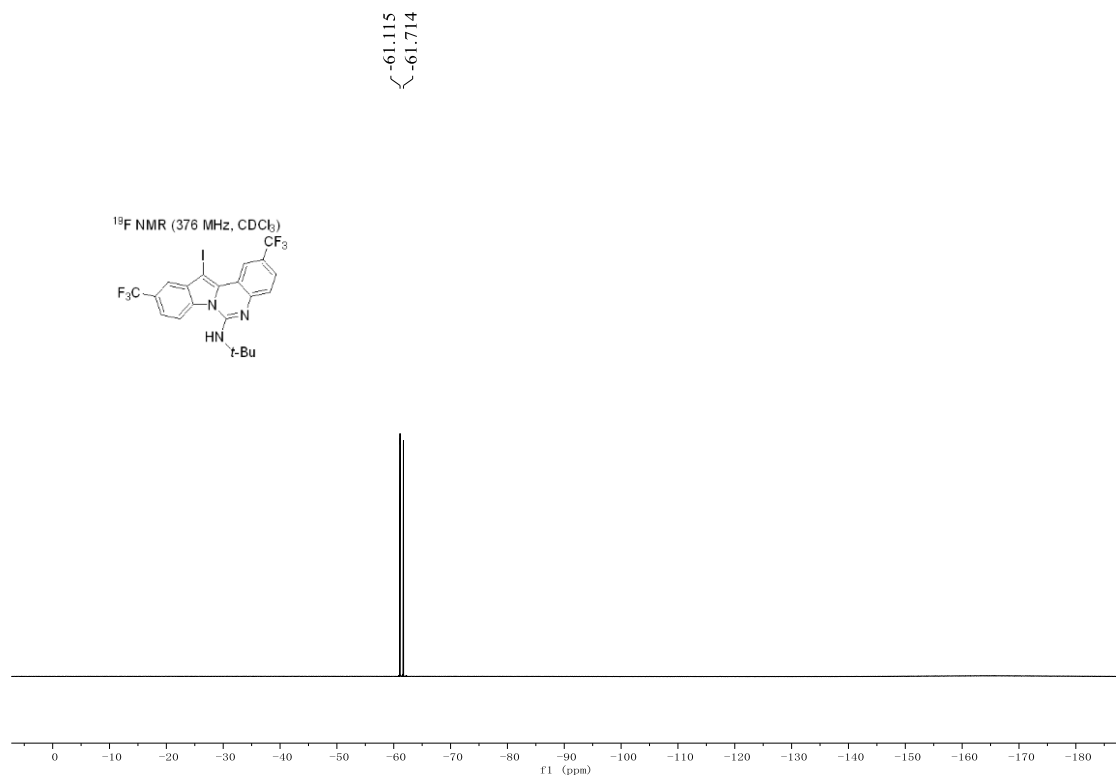

***N*-(*tert*-Butyl)-12-iodo-2,10-dimethylindolo[1,2-*c*]quinazolin-6-amine (3f)**

<sup>1</sup>H NMR (400 MHz, CDCl<sub>3</sub>) of compound of **3f**

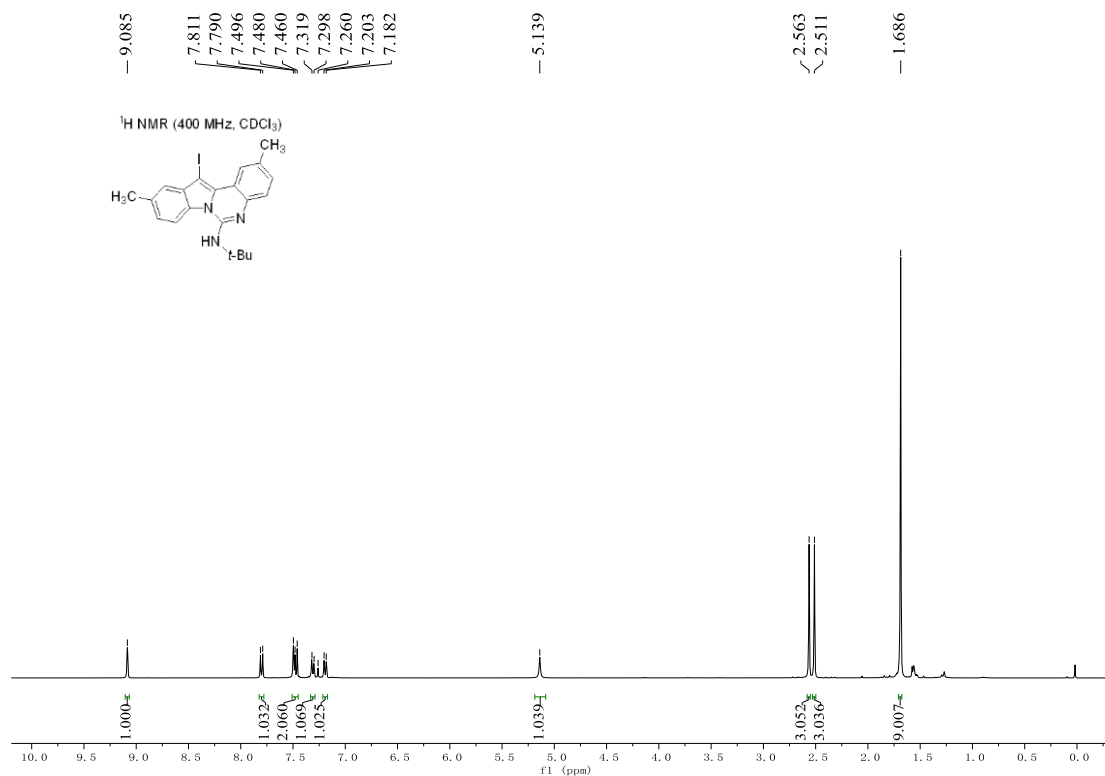

<sup>13</sup>C NMR (100 MHz, CDCl<sub>3</sub>) of compound **3f**

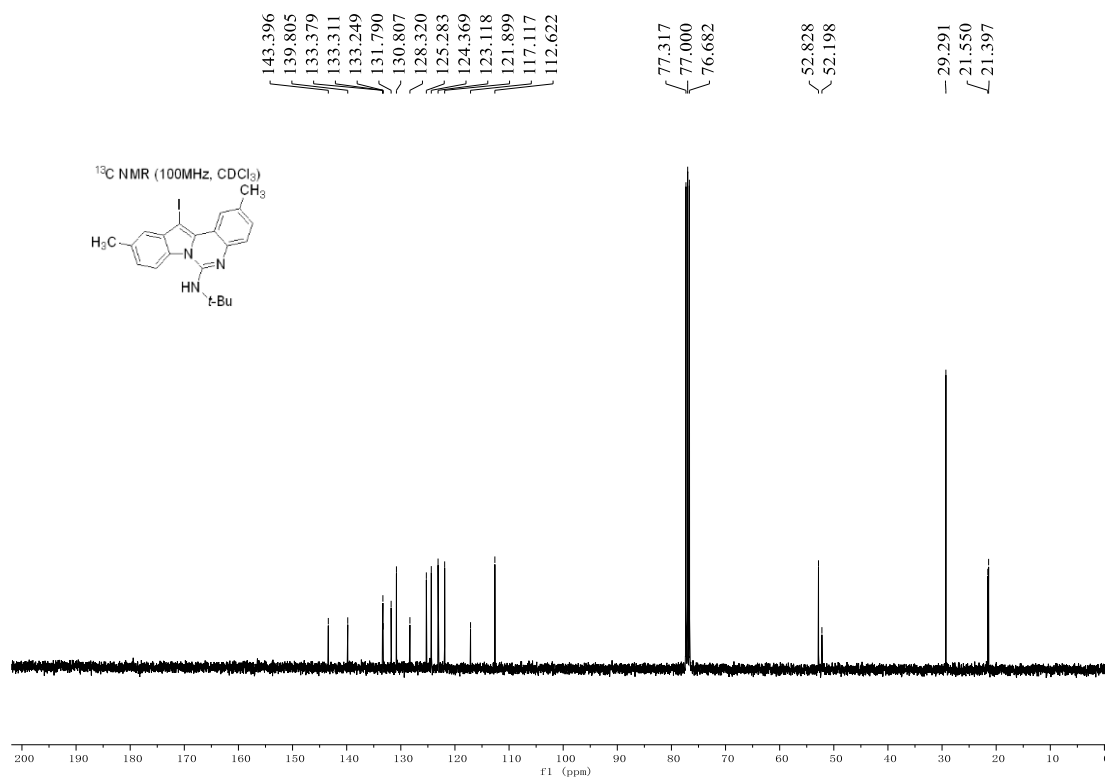

***N*-(*tert*-Butyl)-12-iodo-2,10-dimethoxyindolo[1,2-*c*]quinazolin-6-amine (3g)**

<sup>1</sup>H NMR (400 MHz, CDCl<sub>3</sub>) of compound of **3g**

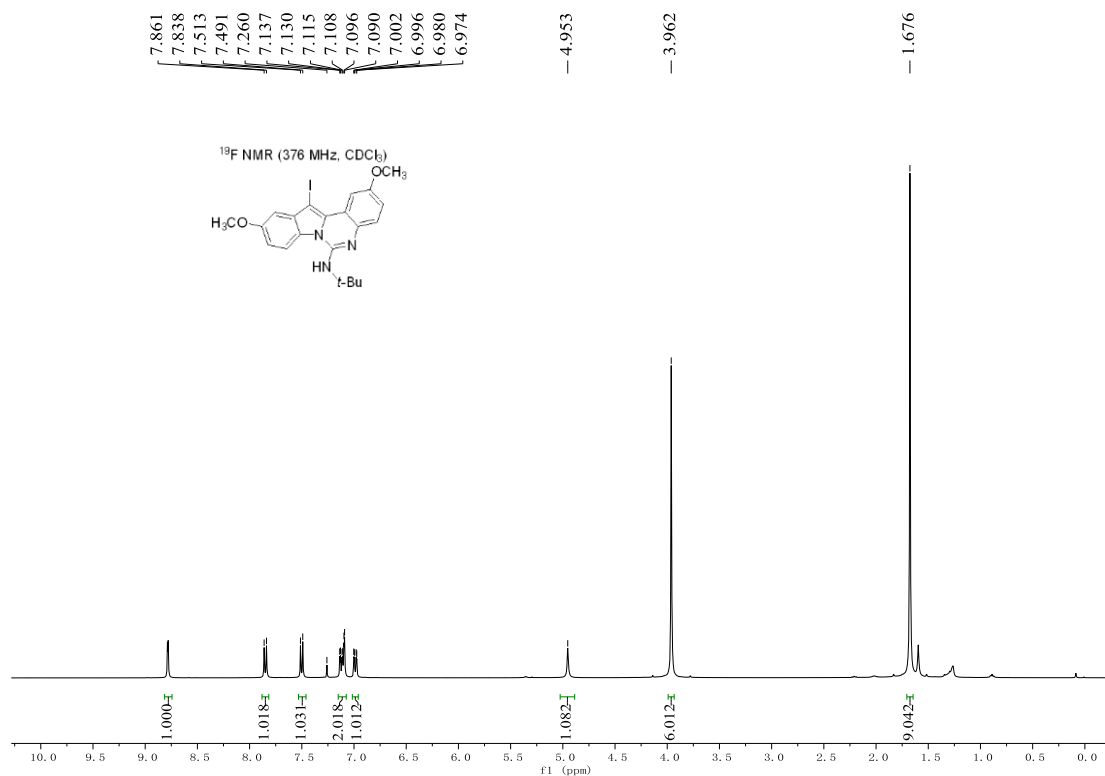

<sup>13</sup>C NMR (100 Mz, CDCl<sub>3</sub>) of compound **3g**

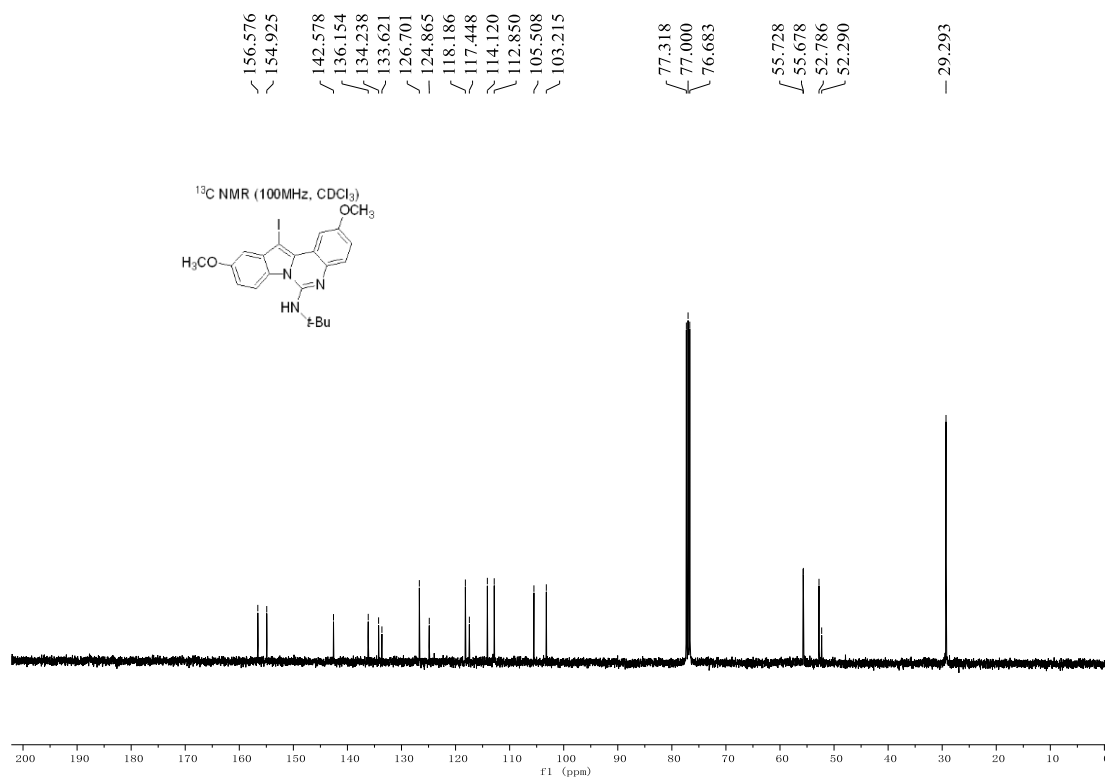

***N*,2,10-Tri-*tert*-butyl-12-iodoindolo[1,2-*c*]quinazolin-6-amine (3h)**

<sup>1</sup>H NMR (400 MHz, CDCl<sub>3</sub>) of compound of **3h**

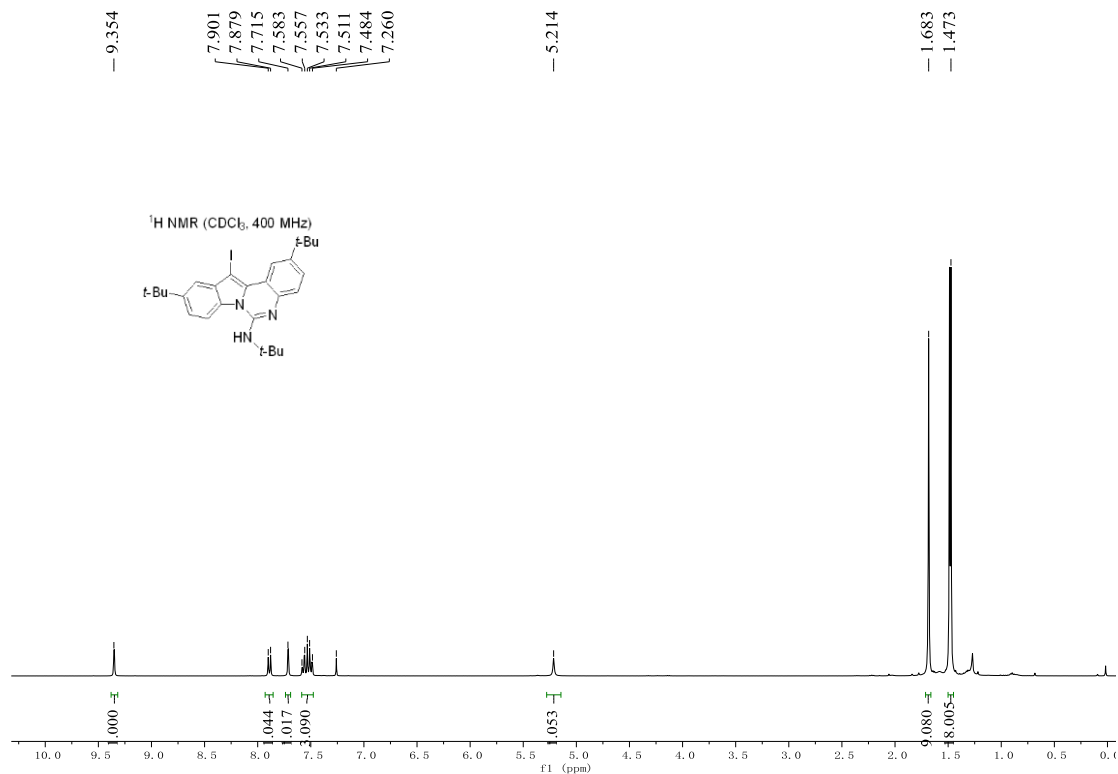

<sup>13</sup>C NMR (100 Mz, CDCl<sub>3</sub>) of compound **3h**

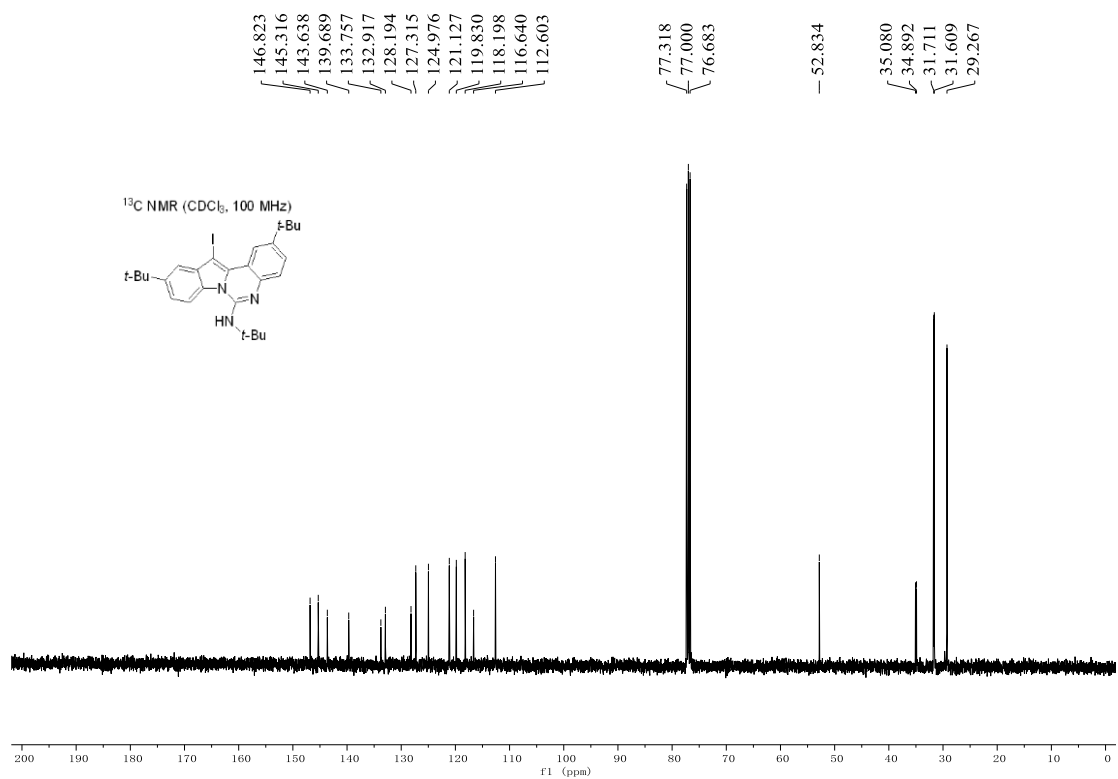

***N*-(*tert*-Butyl)-3,9-difluoro-12-iodoindolo[1,2-*c*]quinazolin-6-amine (3i)**

<sup>1</sup>H NMR (400 MHz, CDCl<sub>3</sub>) of compound of **3i**

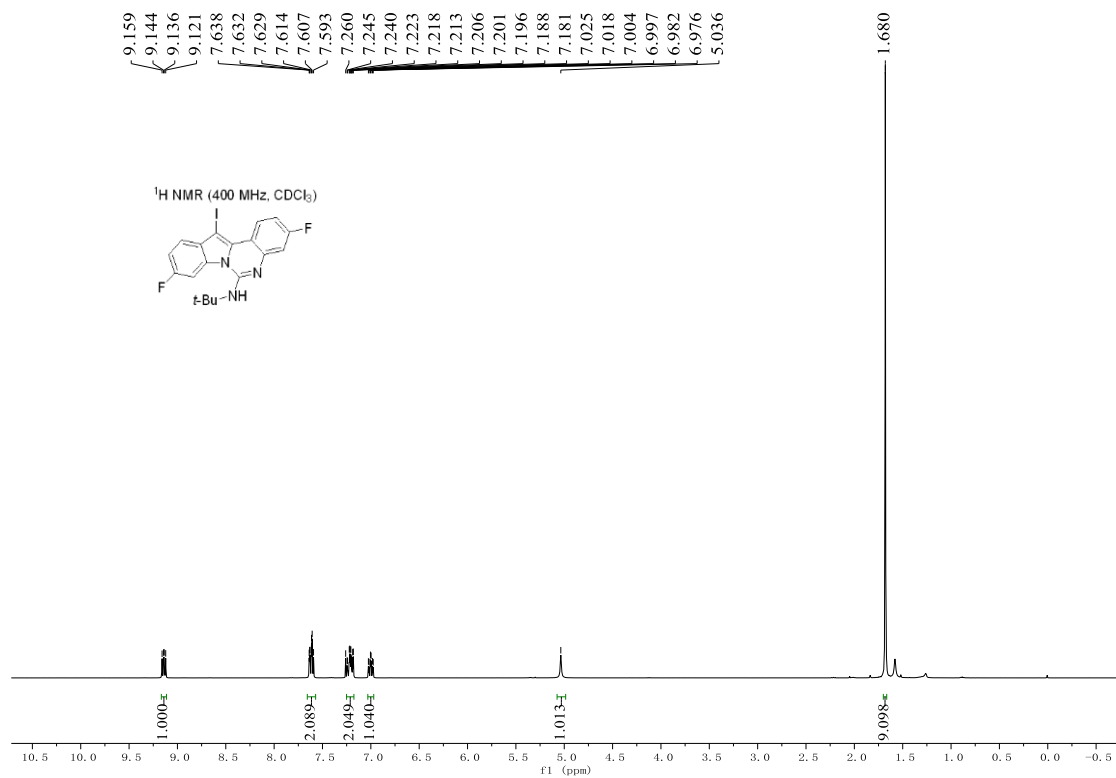

<sup>13</sup>C NMR (100 Mz, CDCl<sub>3</sub>) of compound **3i**

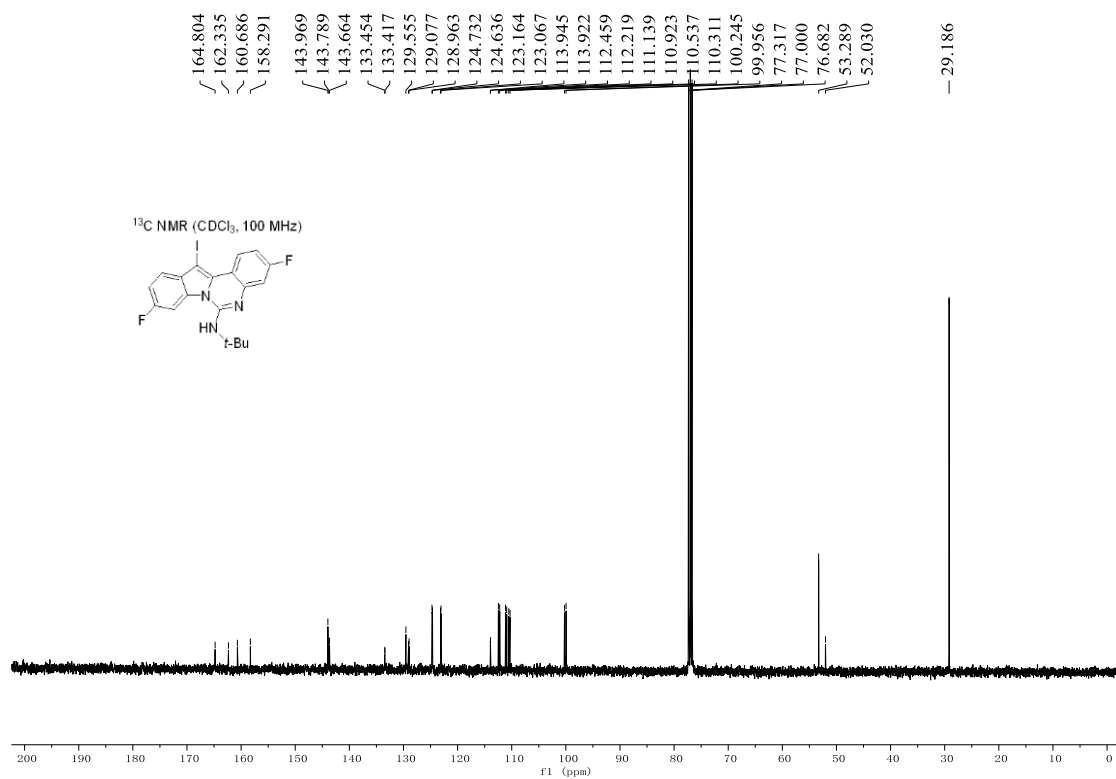

$^{19}\text{F}$  NMR (376 Mz,  $\text{CDCl}_3$ ) of compound **3i**

— -110.923  
— -117.075

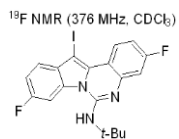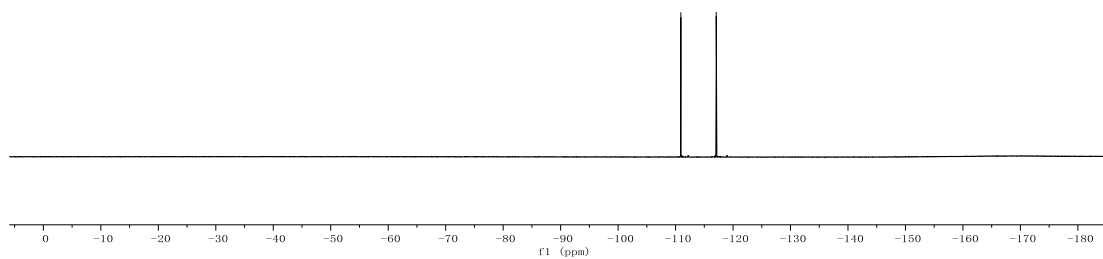

***N*-(*tert*-Butyl)-12-iodo-3,9-bis(trifluoromethyl)indolo[1,2-*c*]quinazolin-6-amine (**3j**)**

$^1\text{H}$  NMR (400 MHz,  $\text{CDCl}_3$ ) of compound of **3j**

9.328, 9.307, 8.258, 7.820, 7.808, 7.787, 7.718, 7.697, 7.514, 7.493, 7.260, 5.157, 1.716

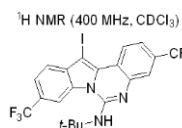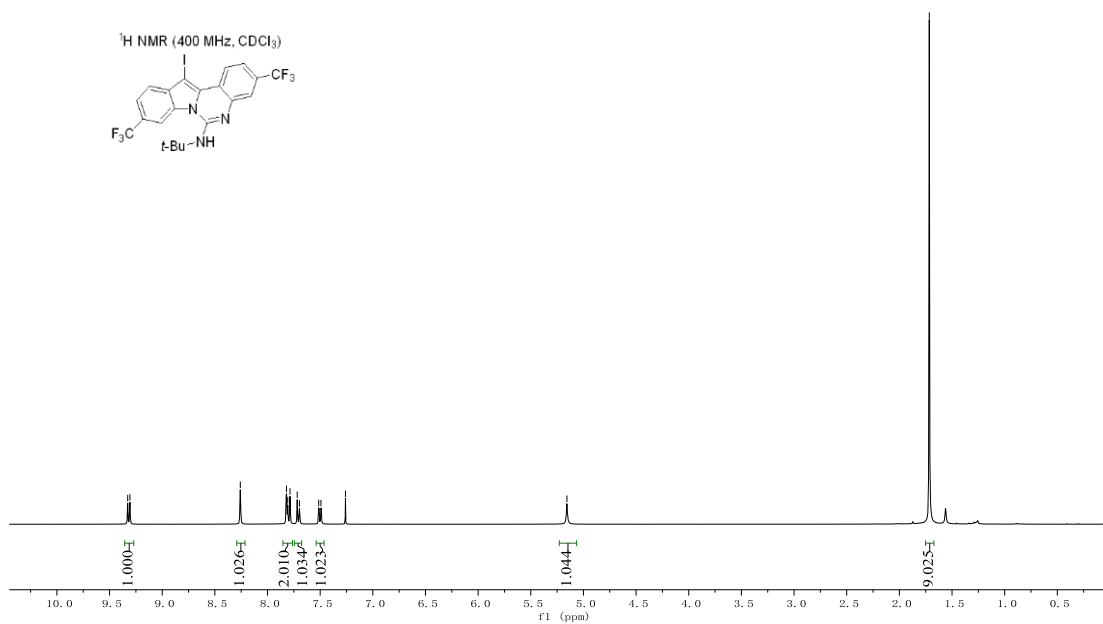



<sup>13</sup>C NMR (100 Mz, CDCl<sub>3</sub>) of compound **3j**

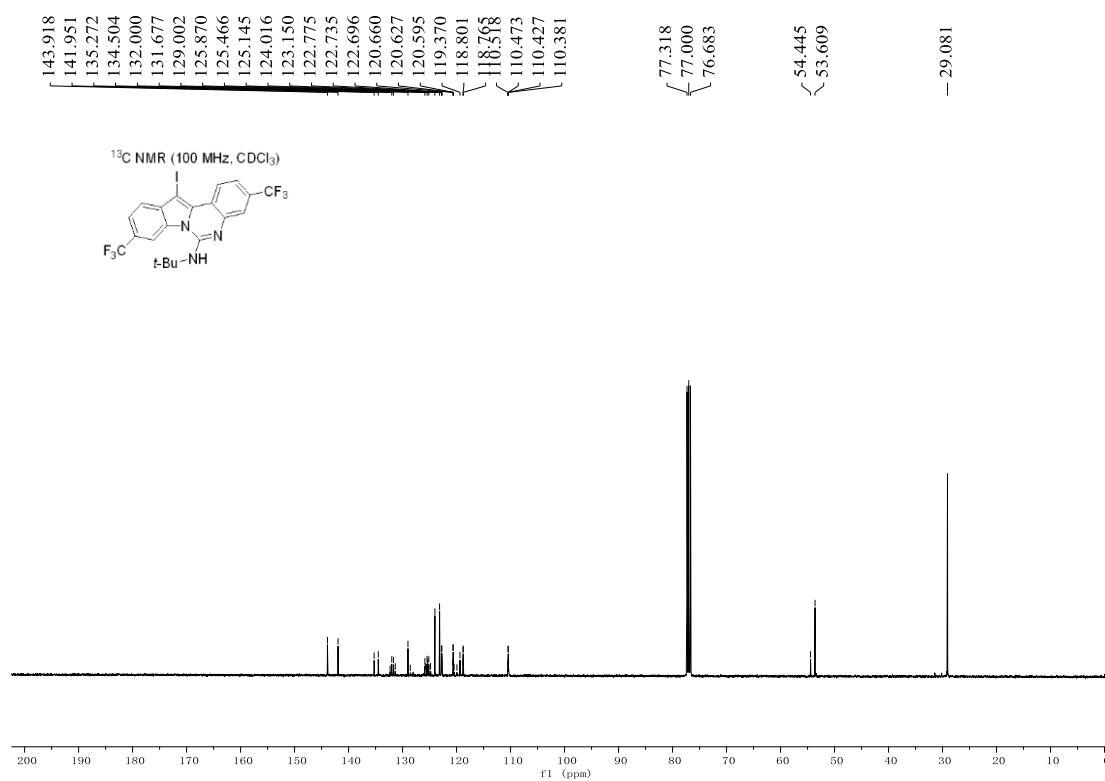

<sup>19</sup>F NMR (376 Mz, CDCl<sub>3</sub>) of compound **3j**

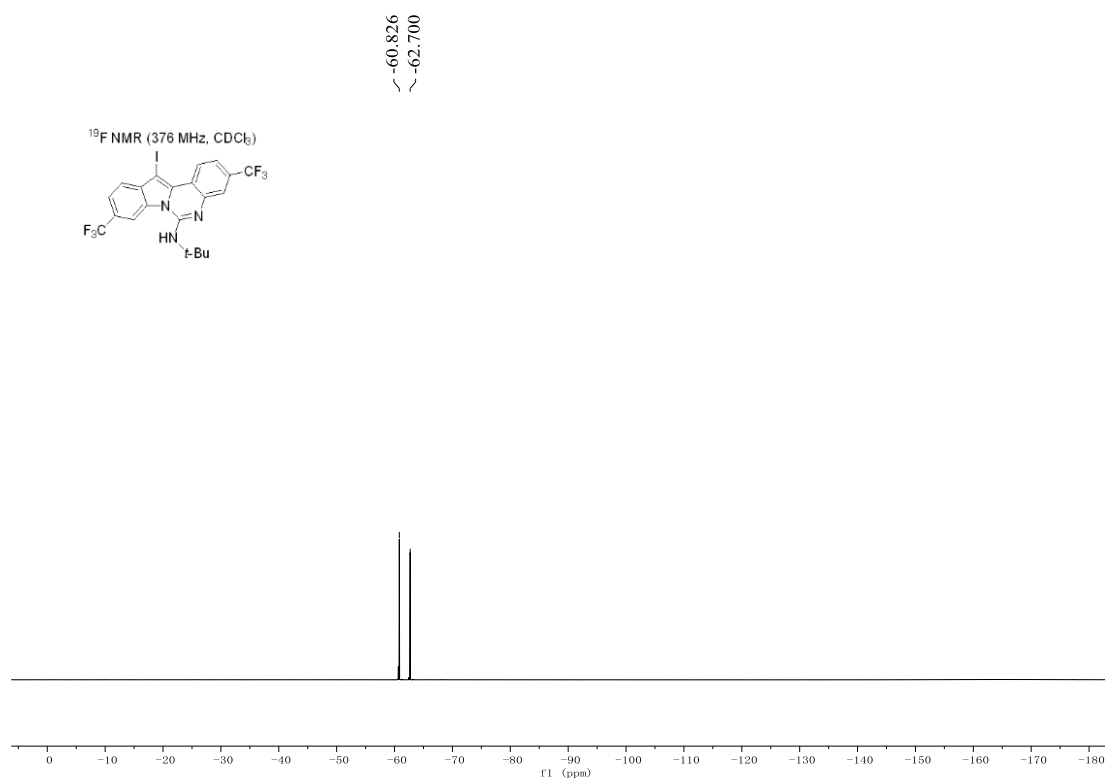

***N*-(*tert*-Butyl)-3,9-dichloro-12-iodoindolo[1,2-*c*]quinazolin-6-amine (3k)**

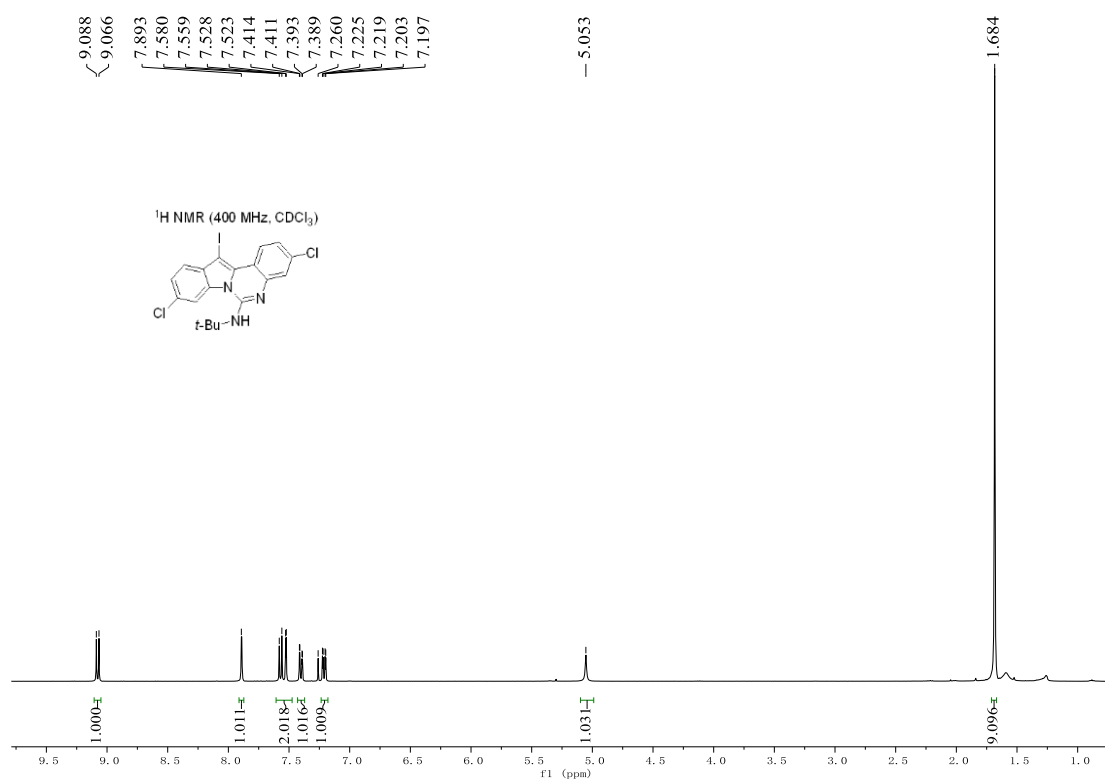

**<sup>13</sup>C NMR (100 Mz, CDCl<sub>3</sub>) of compound **3k****

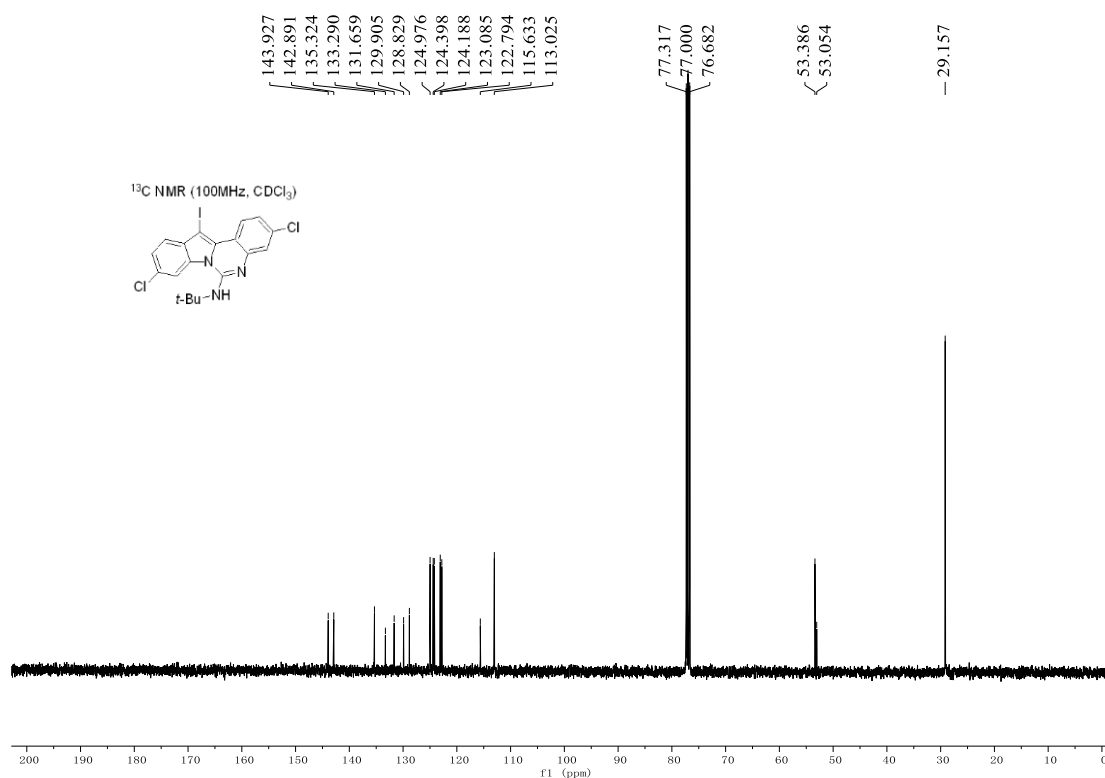

***N*-(*tert*-Butyl)-12-iodo-3,9-dimethylindolo[1,2-*c*]quinazolin-6-amine (31)**

<sup>1</sup>H NMR (400 MHz, CDCl<sub>3</sub>) of compound of **31**

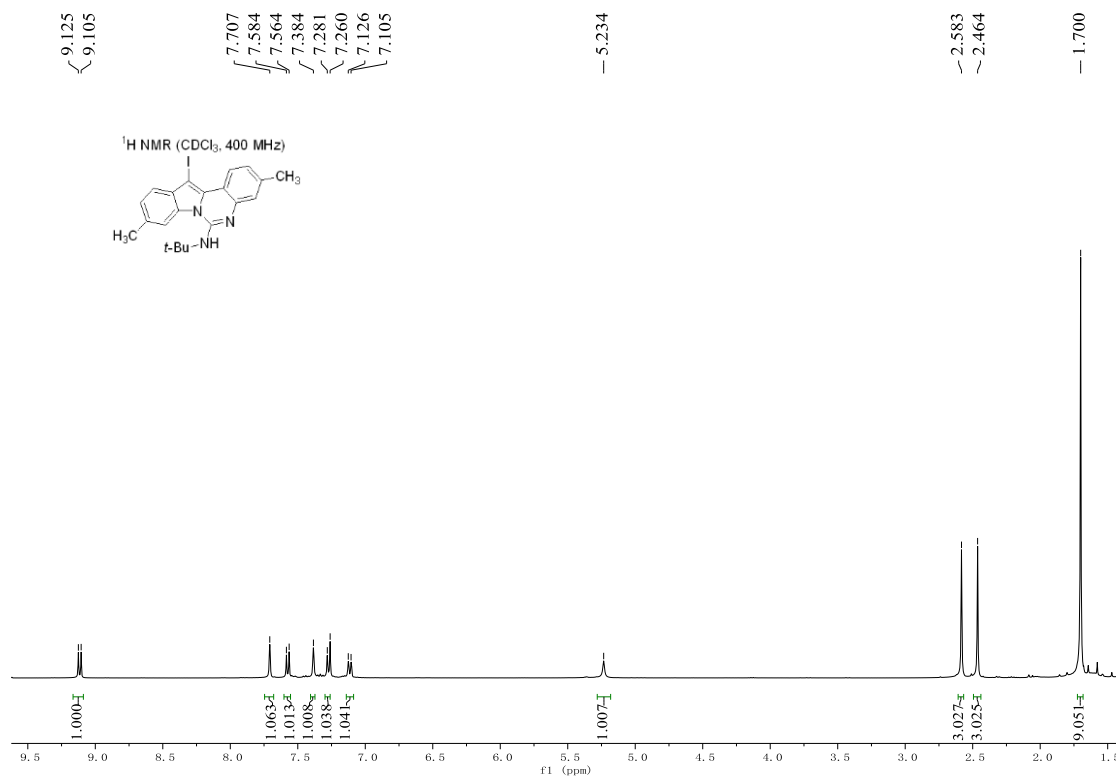

<sup>13</sup>C NMR (100 Mz, CDCl<sub>3</sub>) of compound **31**

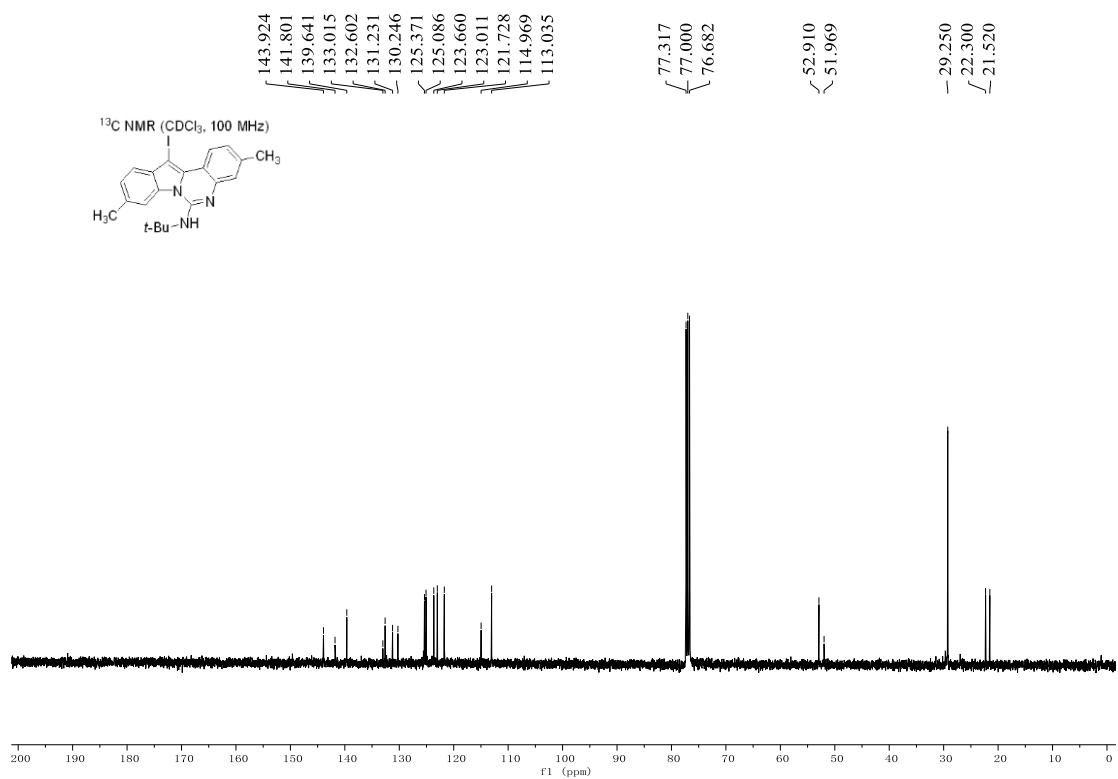

***N*-(*tert*-Butyl)-4,8-dichloro-12-iodoindolo[1,2-*c*]quinazolin-6-amine (**3m**)**

<sup>1</sup>H NMR (400 MHz, CDCl<sub>3</sub>) of compound of **3m**

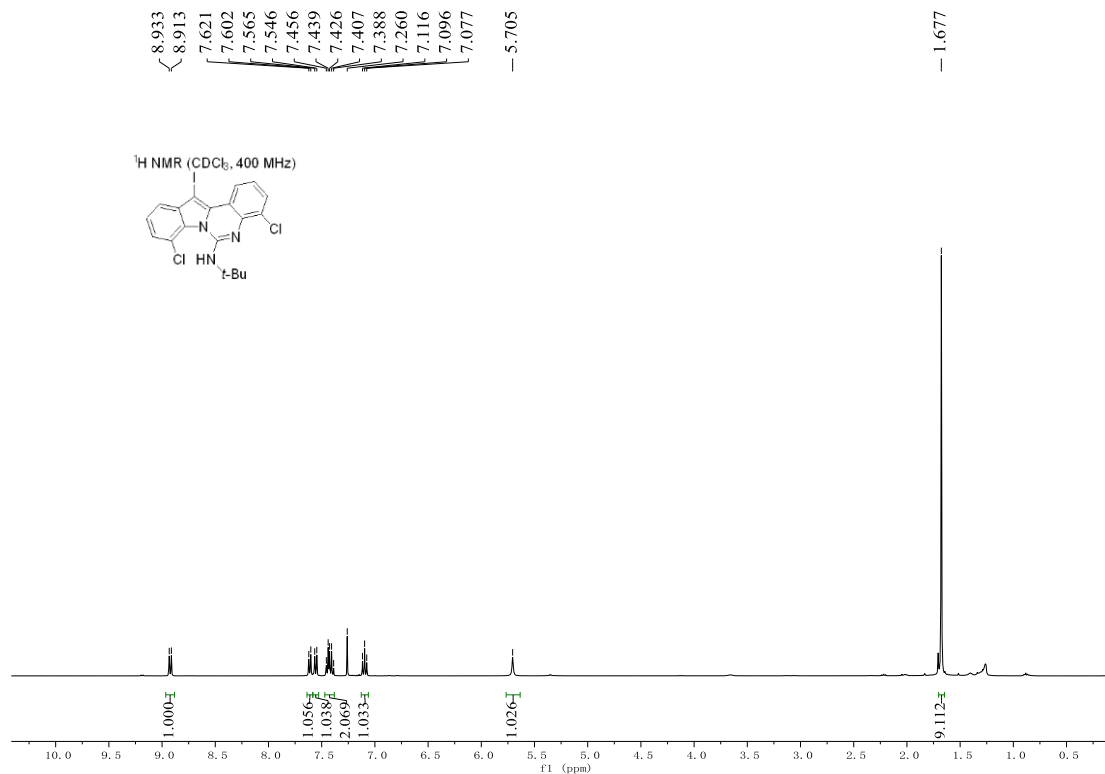

<sup>13</sup>C NMR (100 Mz, CDCl<sub>3</sub>) of compound **3m**

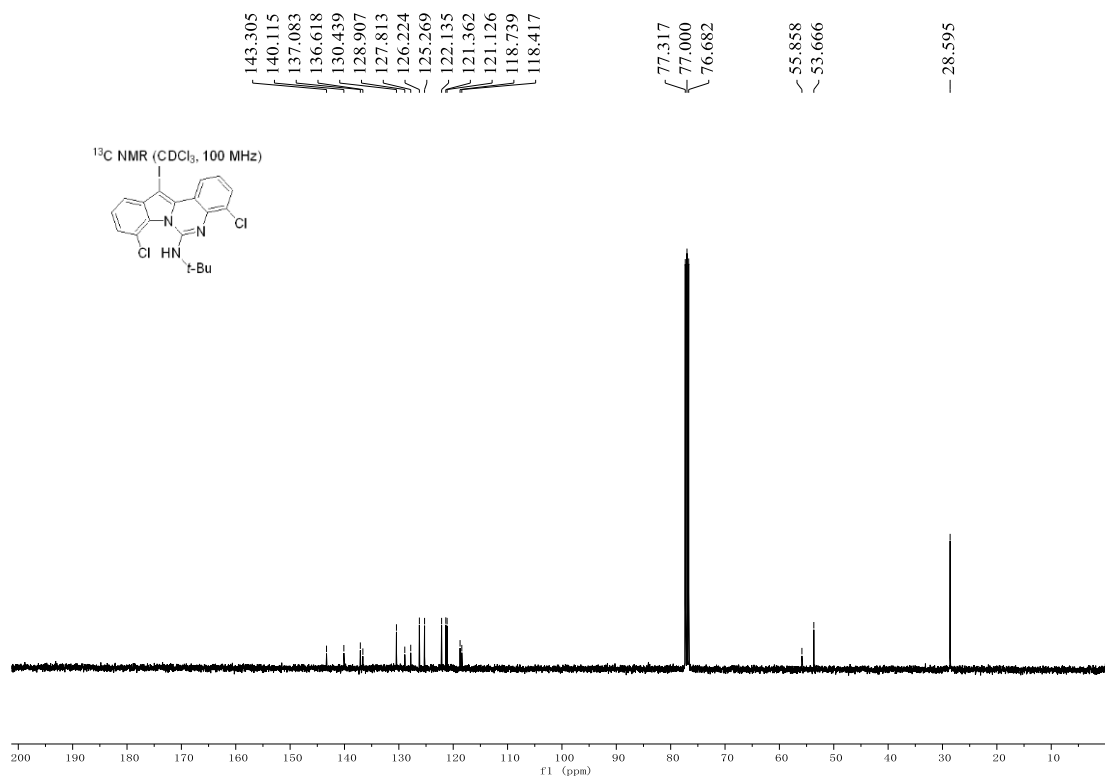

***N*-(*tert*-Butyl)-2,3,9,10-tetrafluoro-12-iodoindolo[1,2-*c*]quinazolin-6-amine (3n)**

<sup>1</sup>H NMR (400 MHz, CDCl<sub>3</sub>) of compound of **3n**

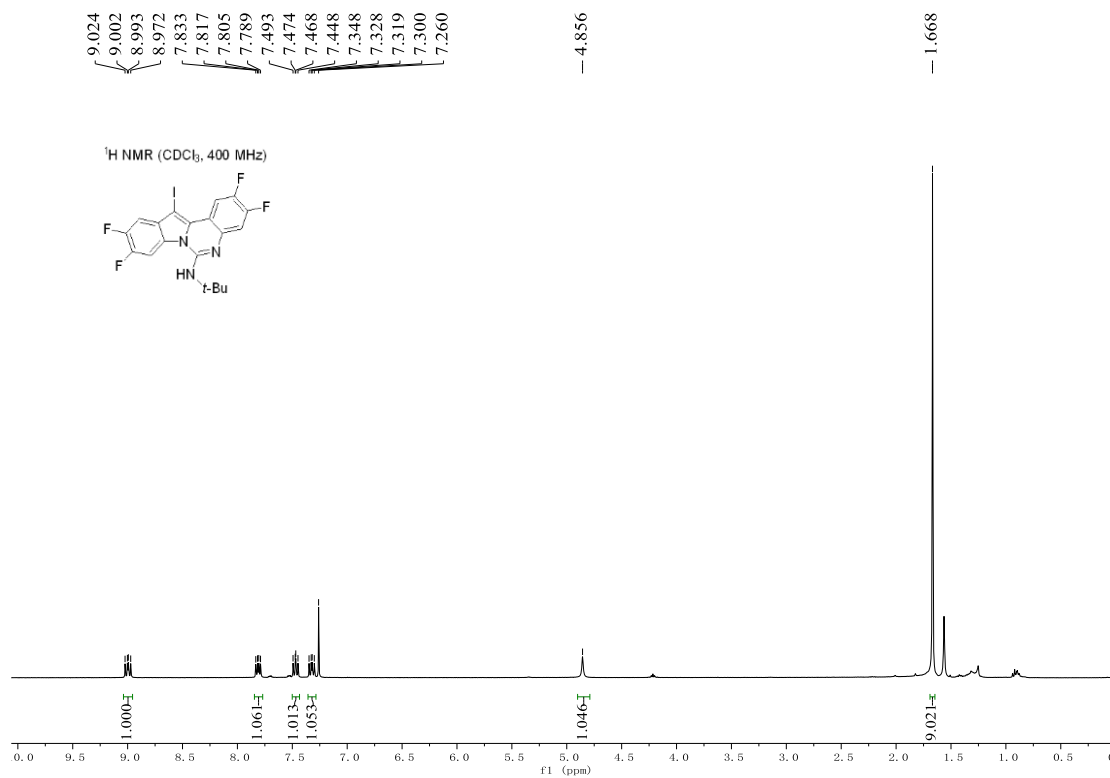

<sup>13</sup>C NMR (100 Mz, CDCl<sub>3</sub>) of compound **3n**

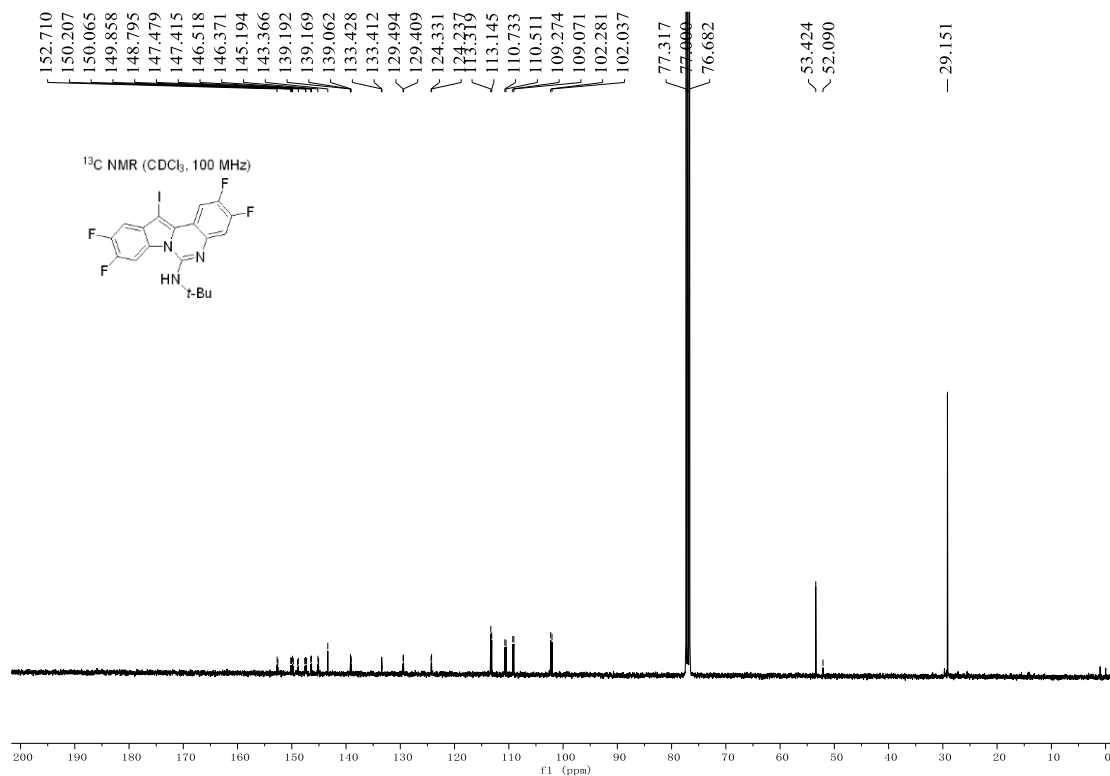

$^{19}\text{F}$  NMR (376 Mz,  $\text{CDCl}_3$ ) of compound **3n**

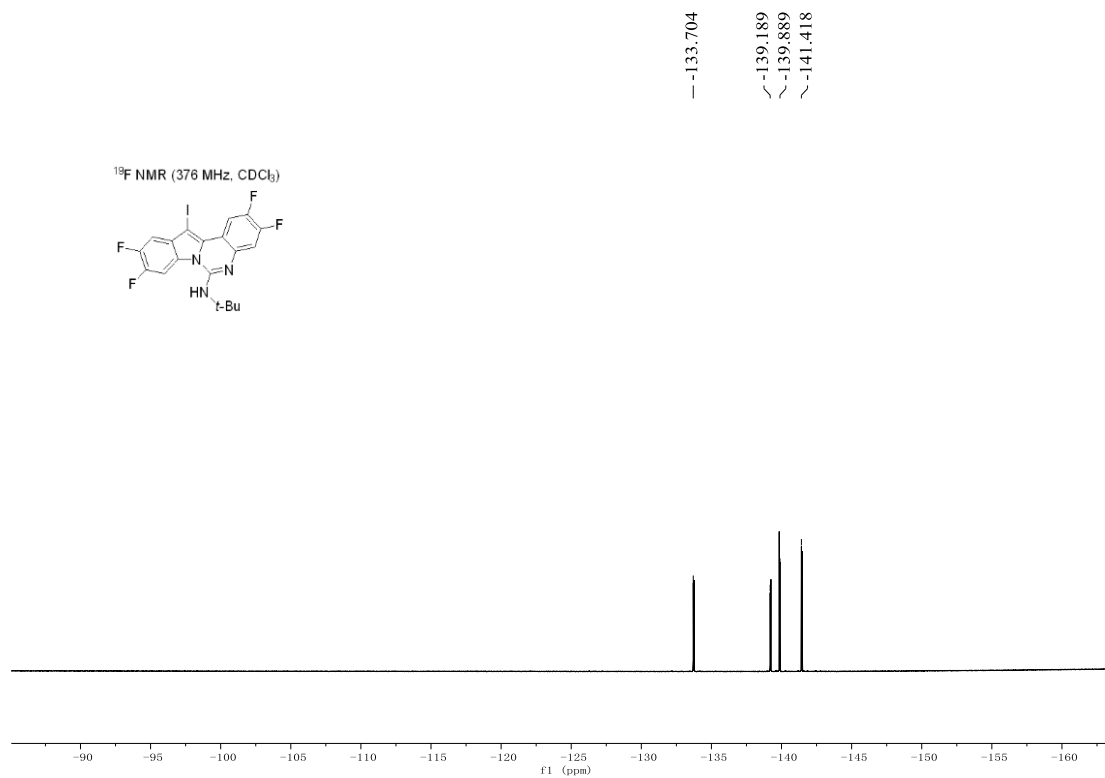

***N*-(*tert*-Butyl)-2,10-dichloro-4,8-difluoro-12-iodoindolo[1,2-*c*]quinazolin-6-amine (3o)**

$^1\text{H}$  NMR (400 MHz,  $\text{CDCl}_3$ ) of compound of **3o**:

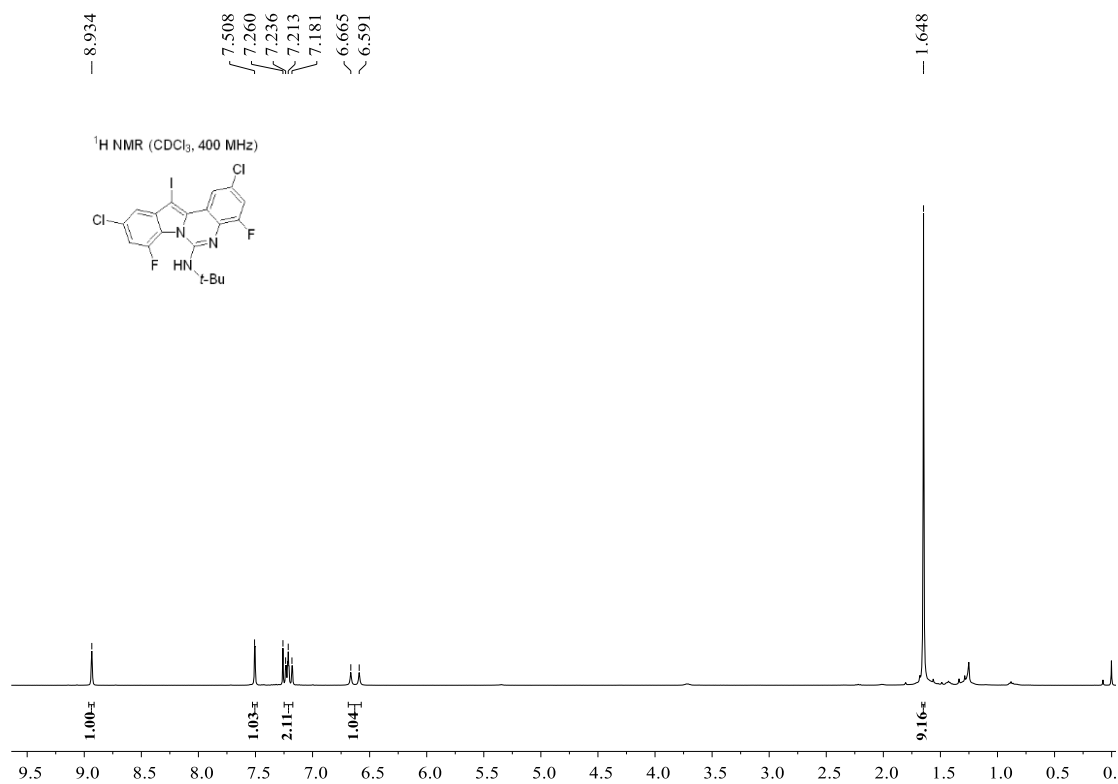

$^{13}\text{C}$  NMR (100 Mz,  $\text{CDCl}_3$ ) of compound **3o**:

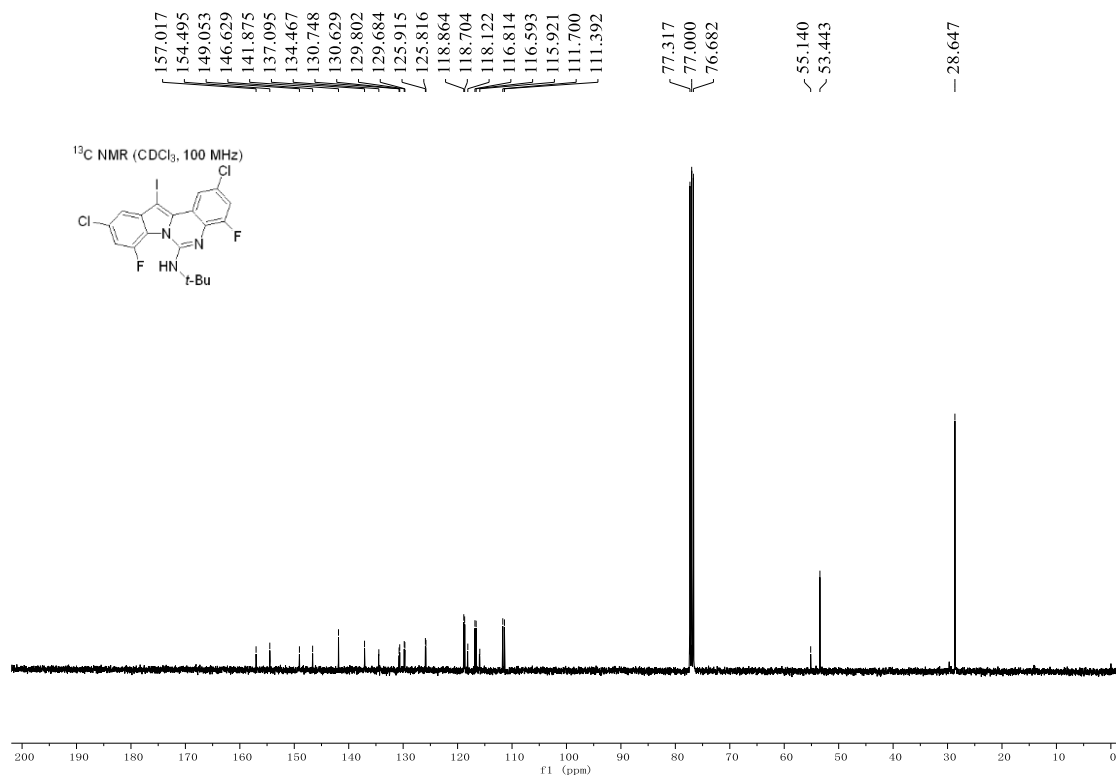

<sup>19</sup>F NMR (376 Mz, CDCl<sub>3</sub>) of compound **3o**:

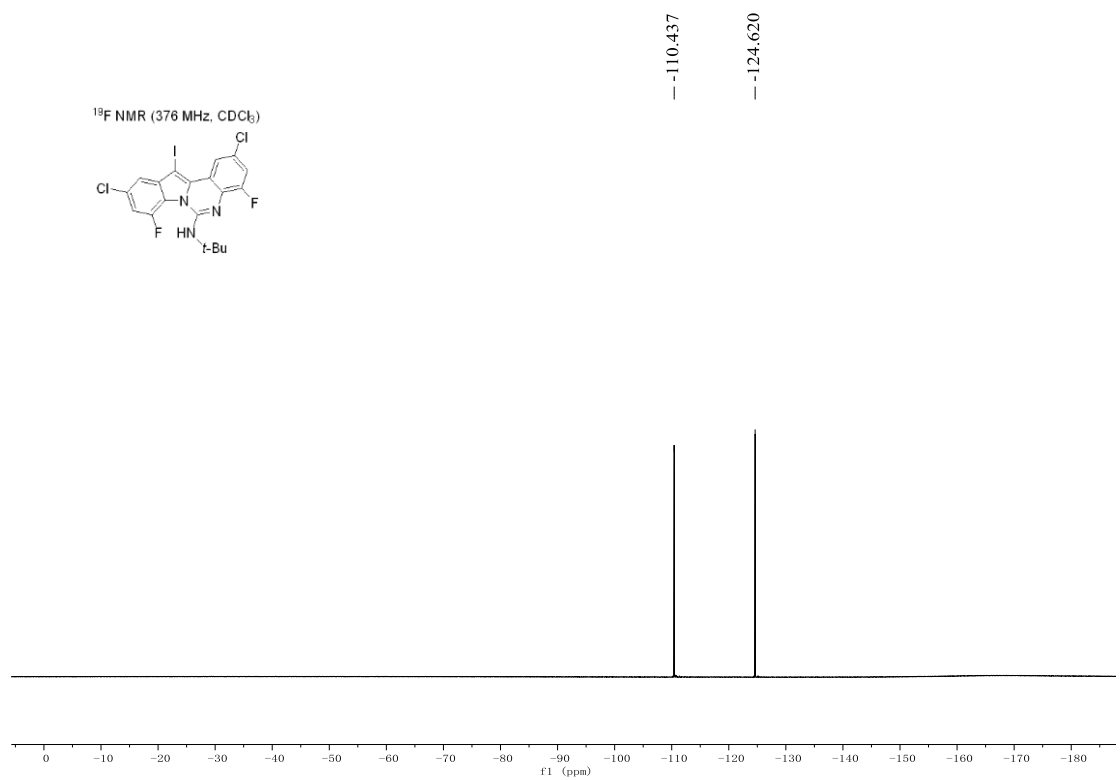

**12-Iodo-N-(2,4,4-trimethylpentan-2-yl)indolo[1,2-c]quinazolin-6-amine (3aa)**

<sup>1</sup>H NMR (400 MHz, CDCl<sub>3</sub>) of compound of 3aa

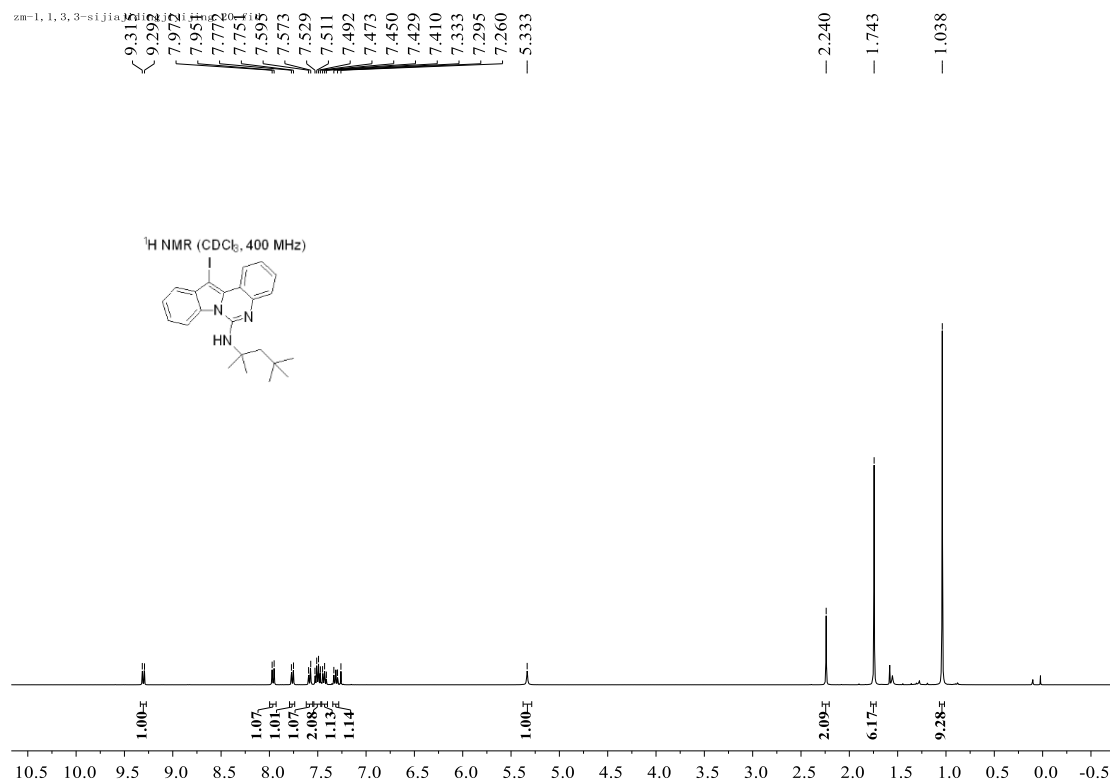

<sup>13</sup>C NMR (100 Mz, CDCl<sub>3</sub>) of compound 3aa

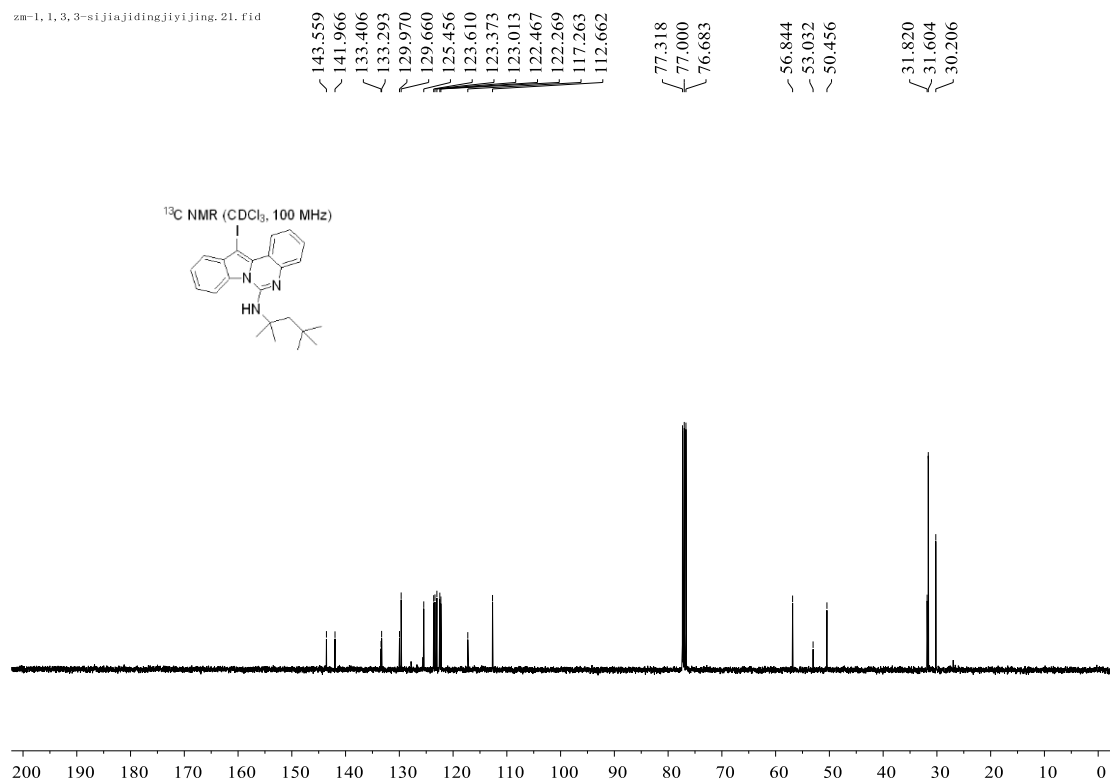



### 12-Iodo-*N*-isopropylindolo[1,2-*c*]quinazolin-6-amine (3ab)

$^1\text{H}$  NMR (400 MHz,  $\text{CDCl}_3$ ) of compound of **3ab**

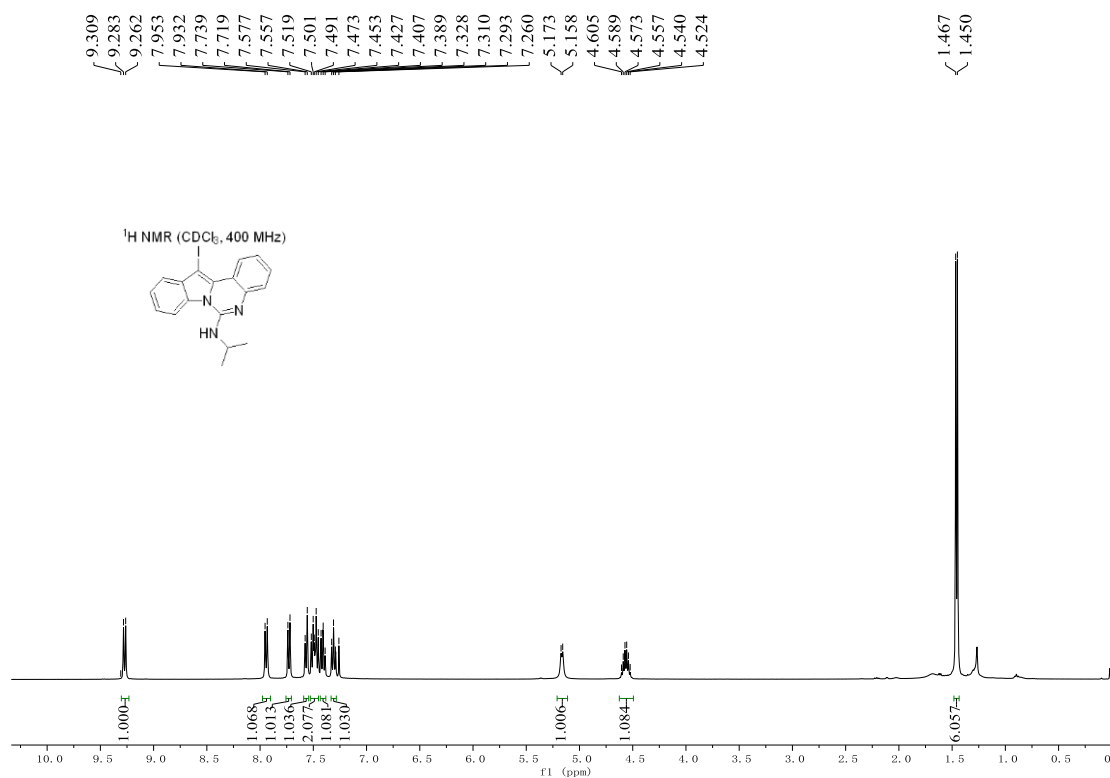

$^{13}\text{C}$  NMR (100 Mz,  $\text{CDCl}_3$ ) of compound **3ab**

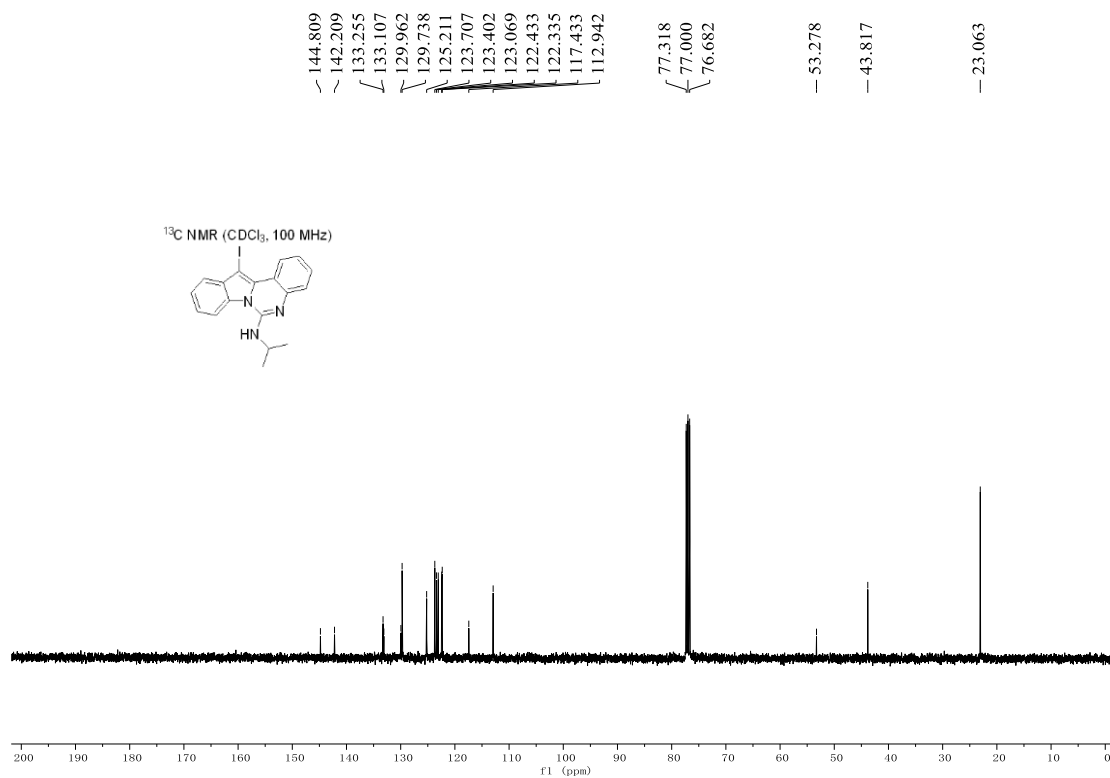

### *N*-Butyl-12-iodoindolo[1,2-*c*]quinazolin-6-amine (**3ac**)

<sup>1</sup>H NMR (400 MHz, CDCl<sub>3</sub>) of compound of **3ac**

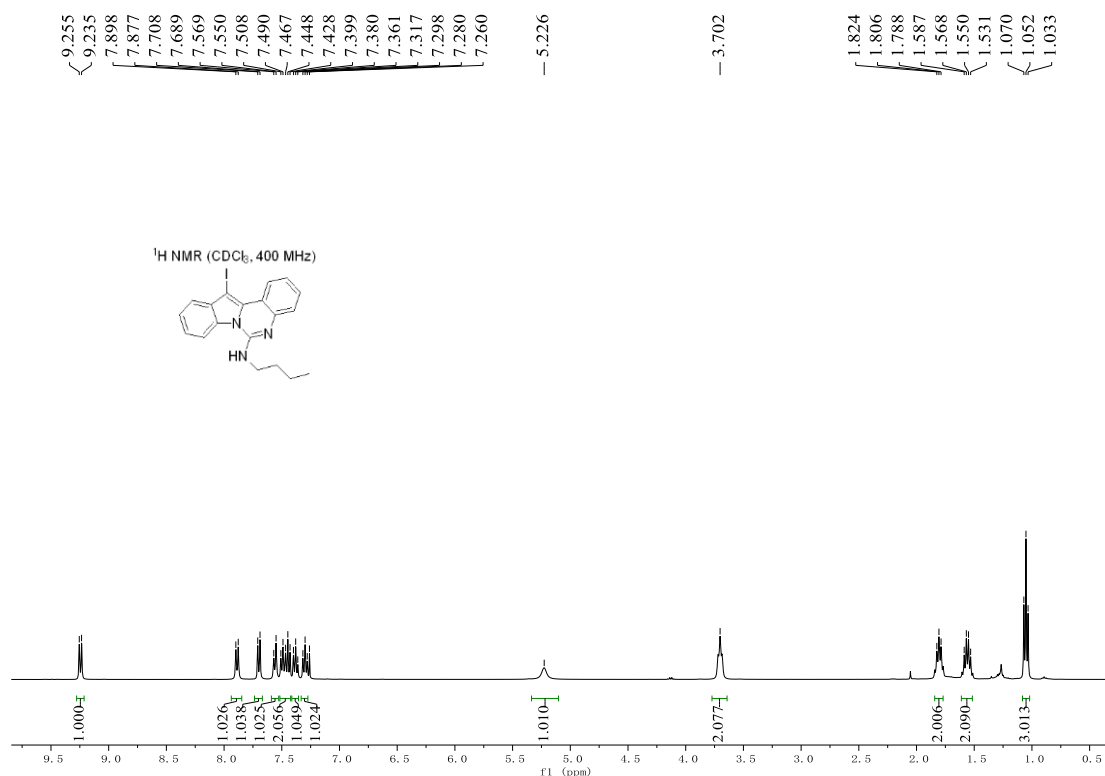

<sup>13</sup>C NMR (100 Mz, CDCl<sub>3</sub>) of compound **3ac**

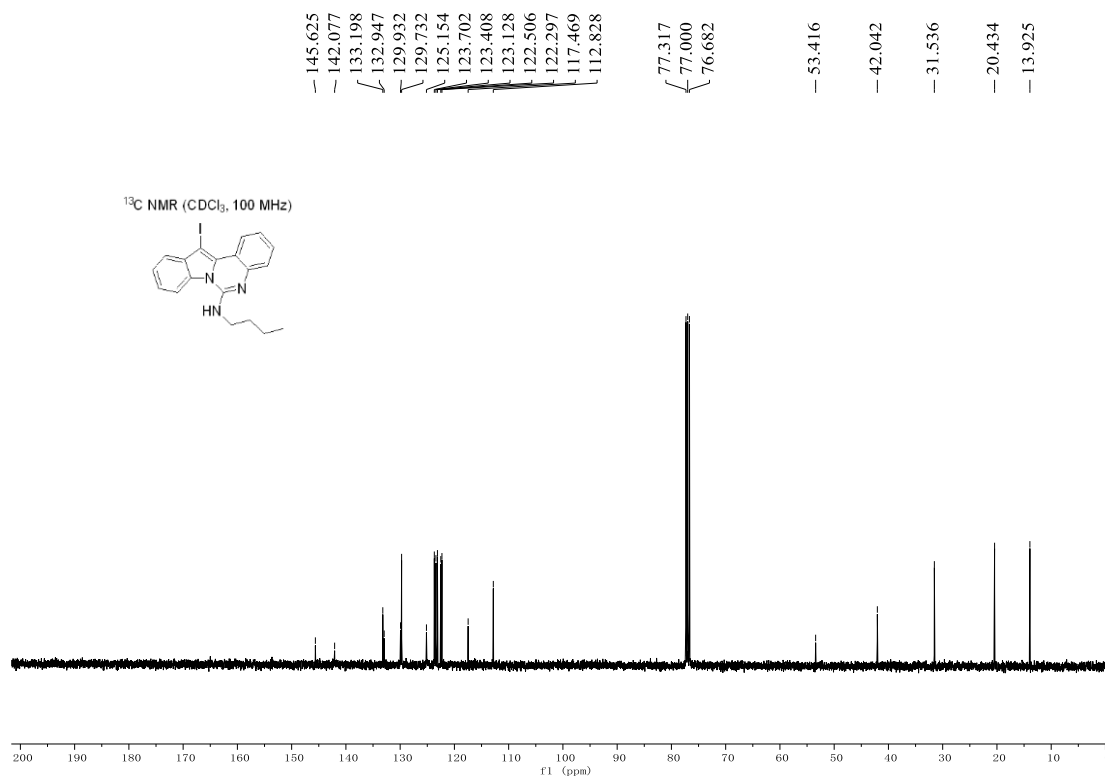

### *N*-Benzyl-12-iodoindolo[1,2-*c*]quinazolin-6-amine (**3ad**)

<sup>1</sup>H NMR (400 MHz, CDCl<sub>3</sub>) of compound of **3ad**

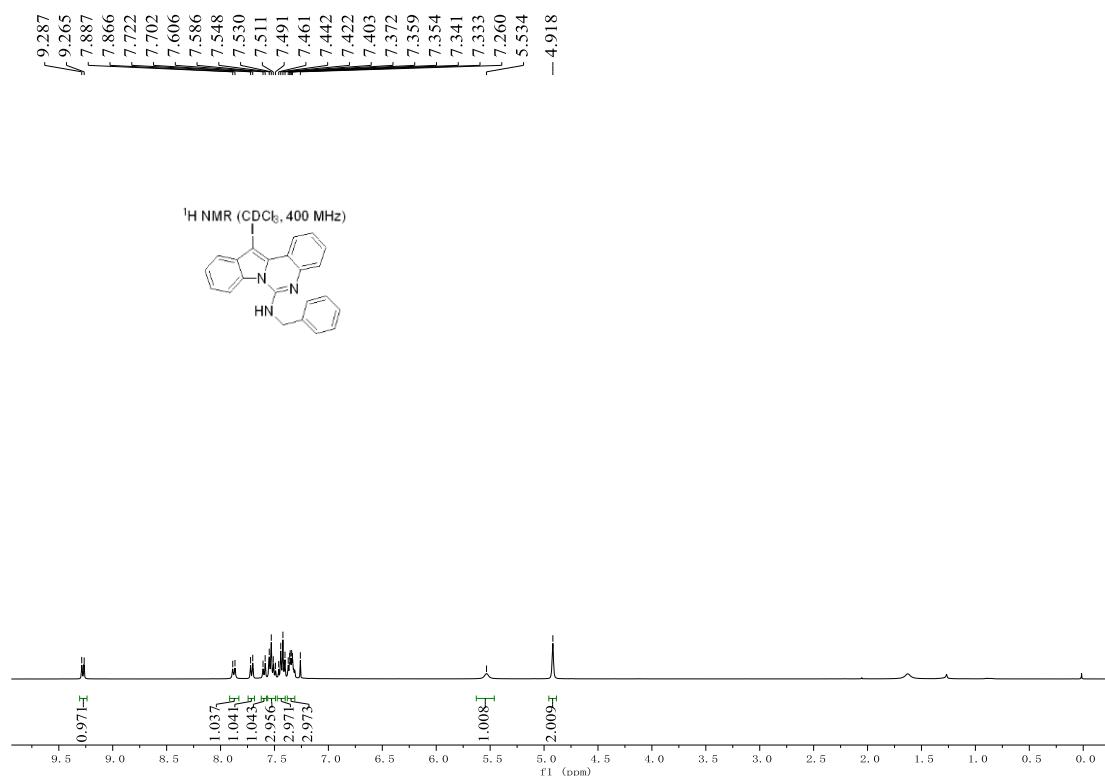

<sup>13</sup>C NMR (100 Mz, CDCl<sub>3</sub>) of compound **3ad**

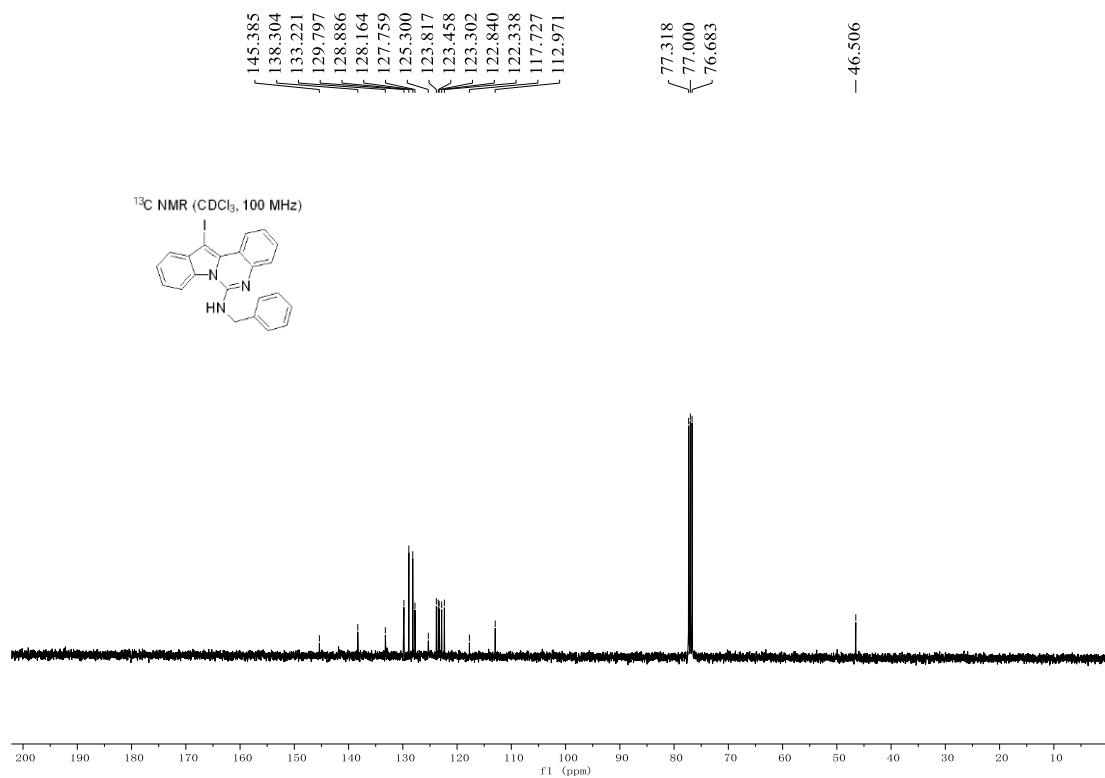

***N*-((3*s*,5*s*,7*s*)-Adamantan-1-yl)-12-iodoindolo[1,2-*c*]quinazolin-6-amine (3ae)**

<sup>1</sup>H NMR (400 MHz, CDCl<sub>3</sub>) of compound of 3ae

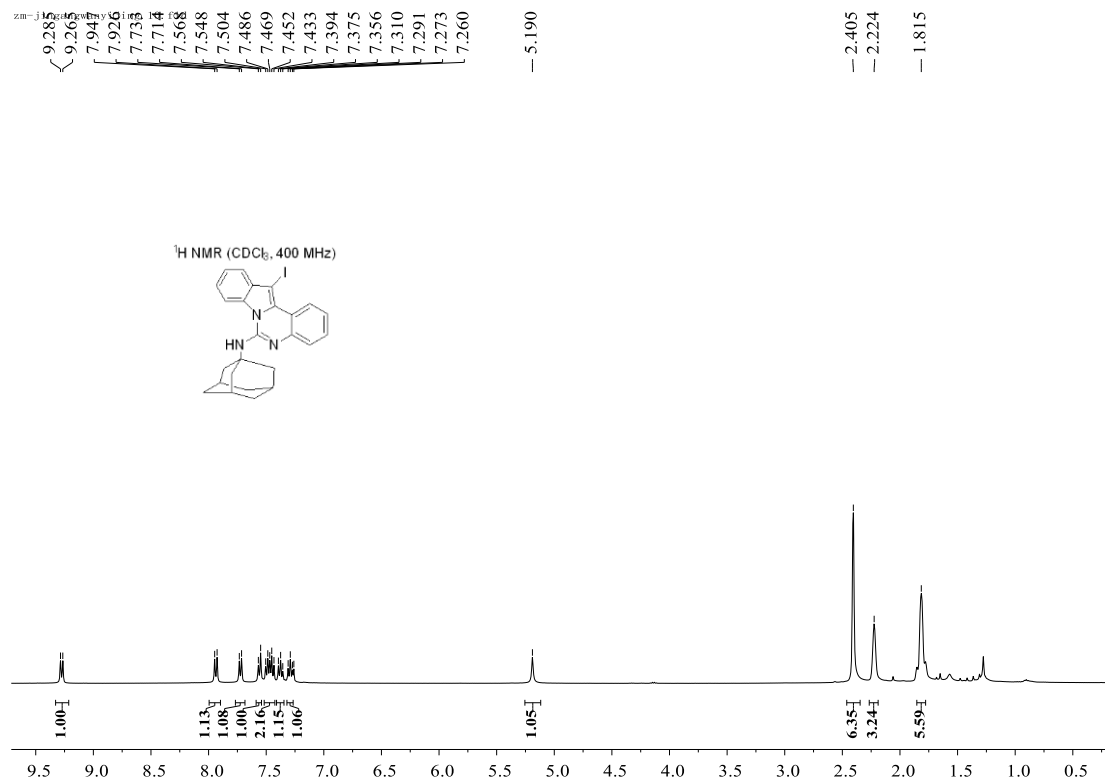

<sup>13</sup>C NMR (100 Mz, CDCl<sub>3</sub>) of compound 3ae

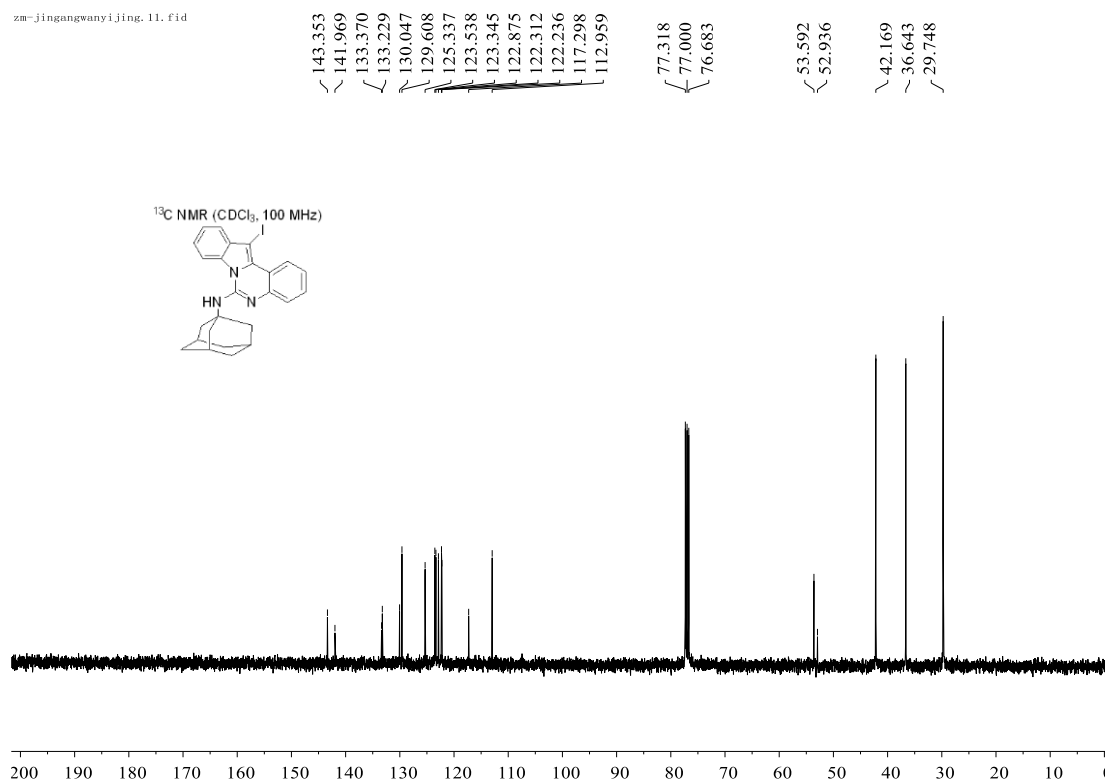

### *N*-Cyclopentyl-12-iodoindolo[1,2-*c*]quinazolin-6-amine (3af)

<sup>1</sup>H NMR (400 MHz, CDCl<sub>3</sub>) of compound of 3af

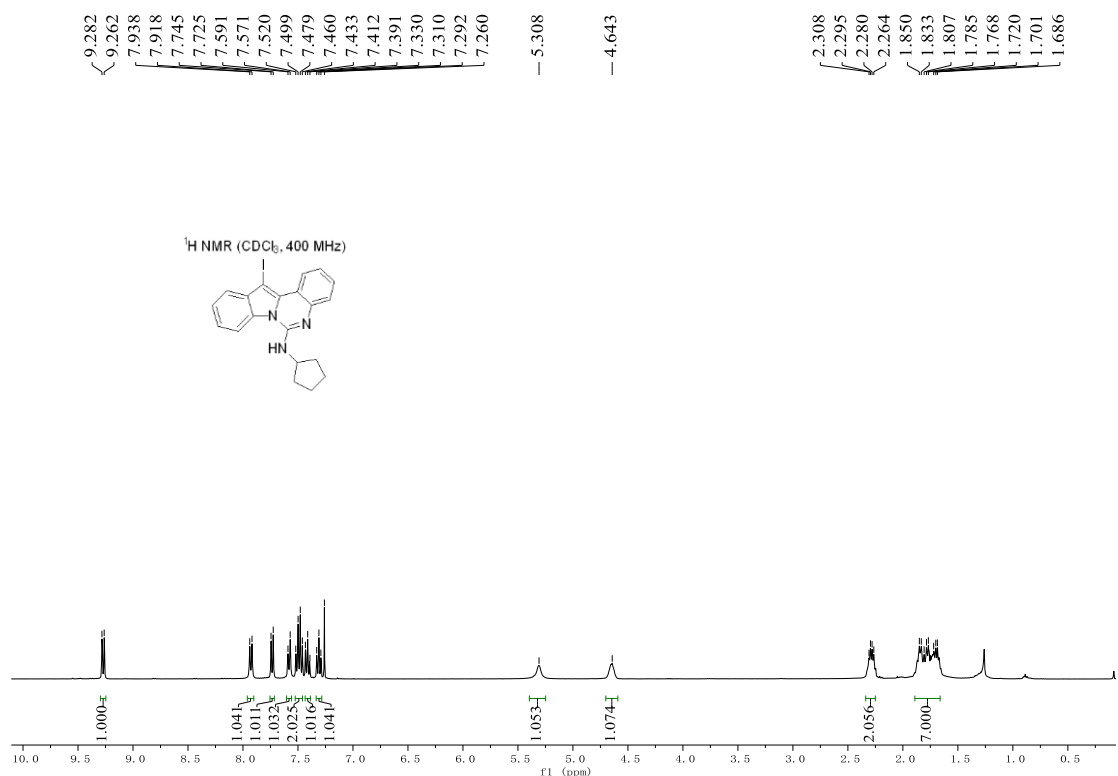

<sup>13</sup>C NMR (100 Mz, CDCl<sub>3</sub>) of compound 3af

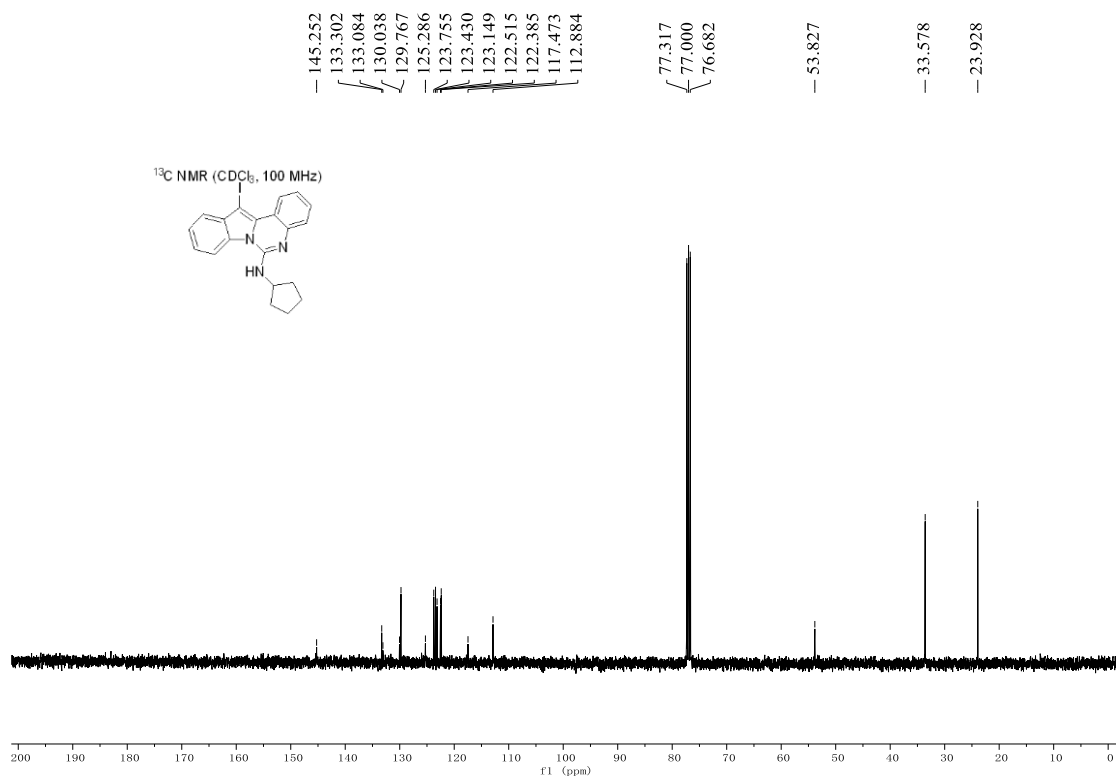

### *N*-Cyclohexyl-12-iodoindolo[1,2-*c*]quinazolin-6-amine (**3ag**)

<sup>1</sup>H NMR (400 MHz, CDCl<sub>3</sub>) of compound of **3ag**

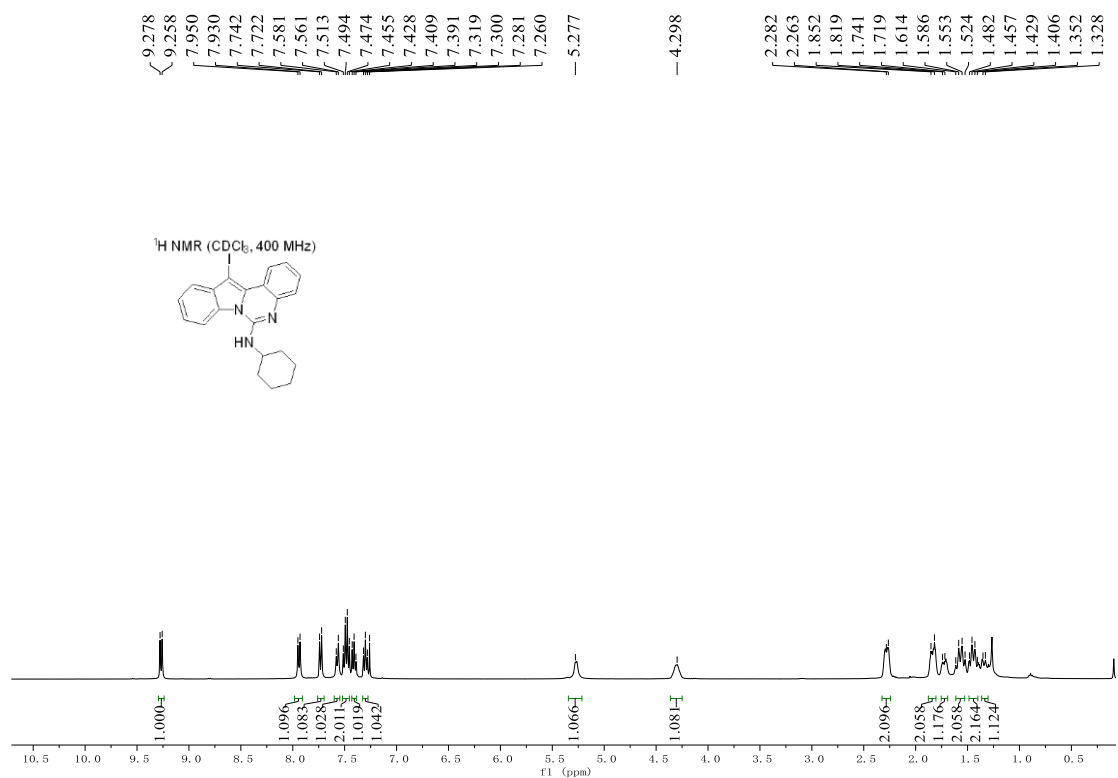

<sup>13</sup>C NMR (100 Mz, CDCl<sub>3</sub>) of compound **3ag**

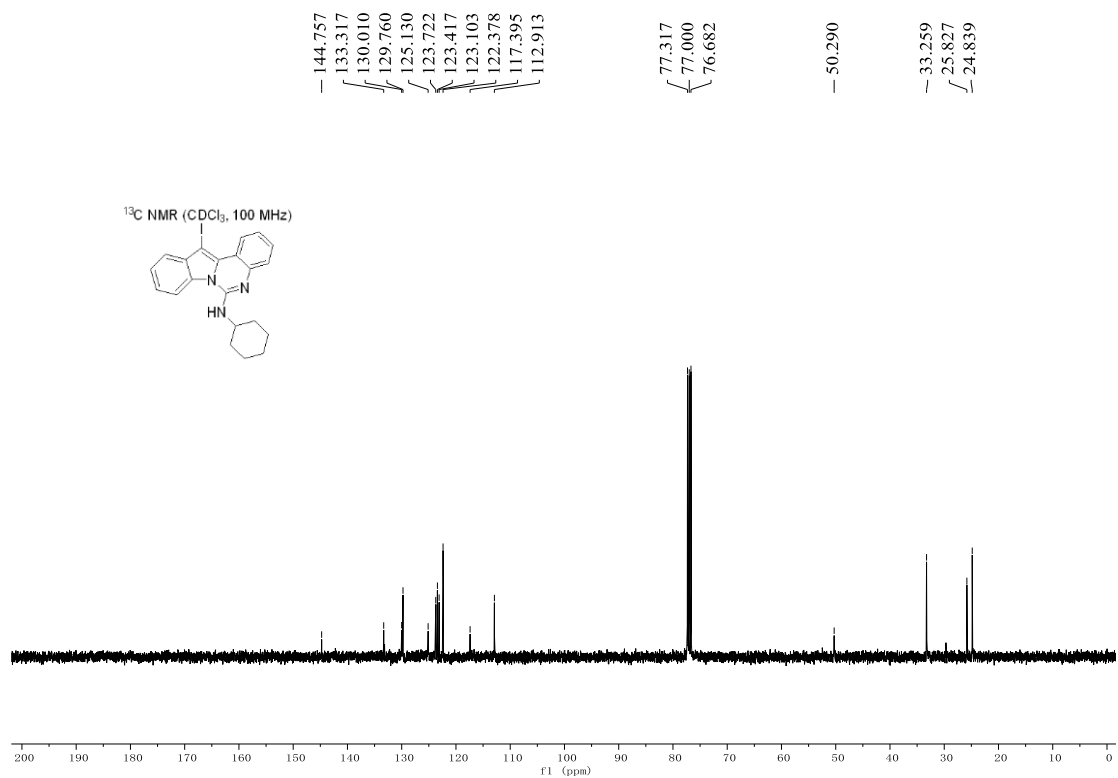

***N*-(*tert*-Butyl)-12-((trimethylsilyl)ethynyl)indolo[1,2-*c*]quinazolin-6-amine (4)**

<sup>1</sup>H NMR (400 MHz, CDCl<sub>3</sub>) of compound of 4

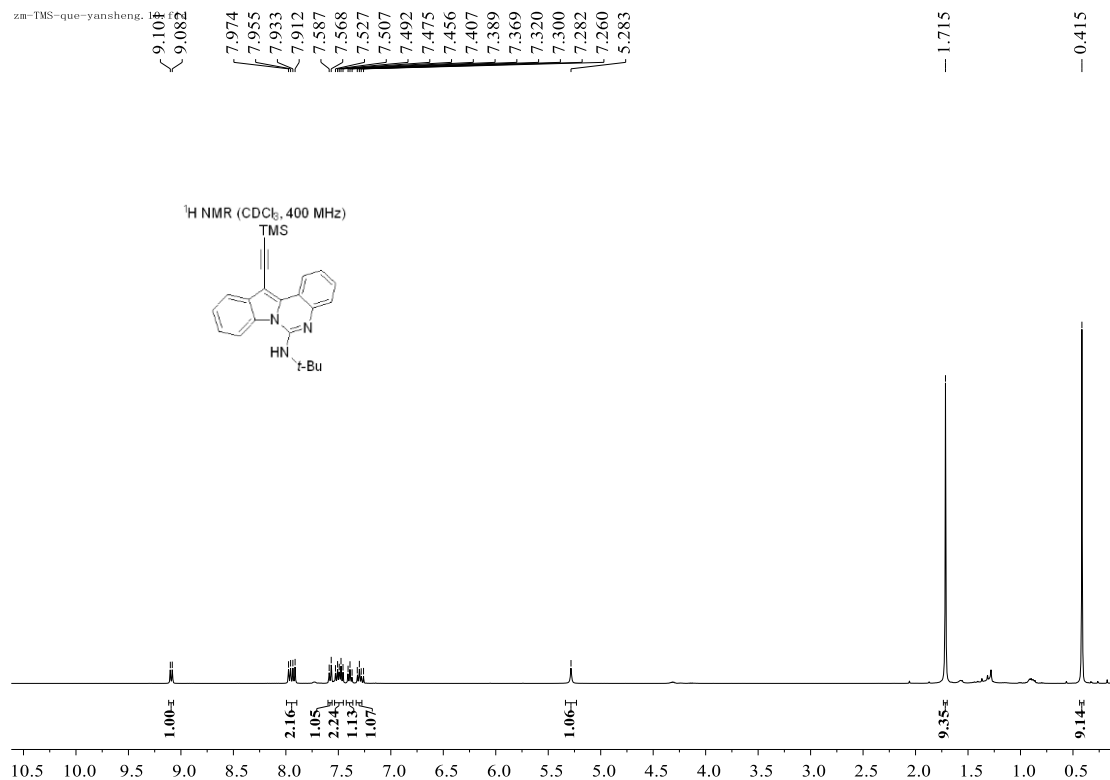

<sup>13</sup>C NMR (100 Mz, CDCl<sub>3</sub>) of compound 4

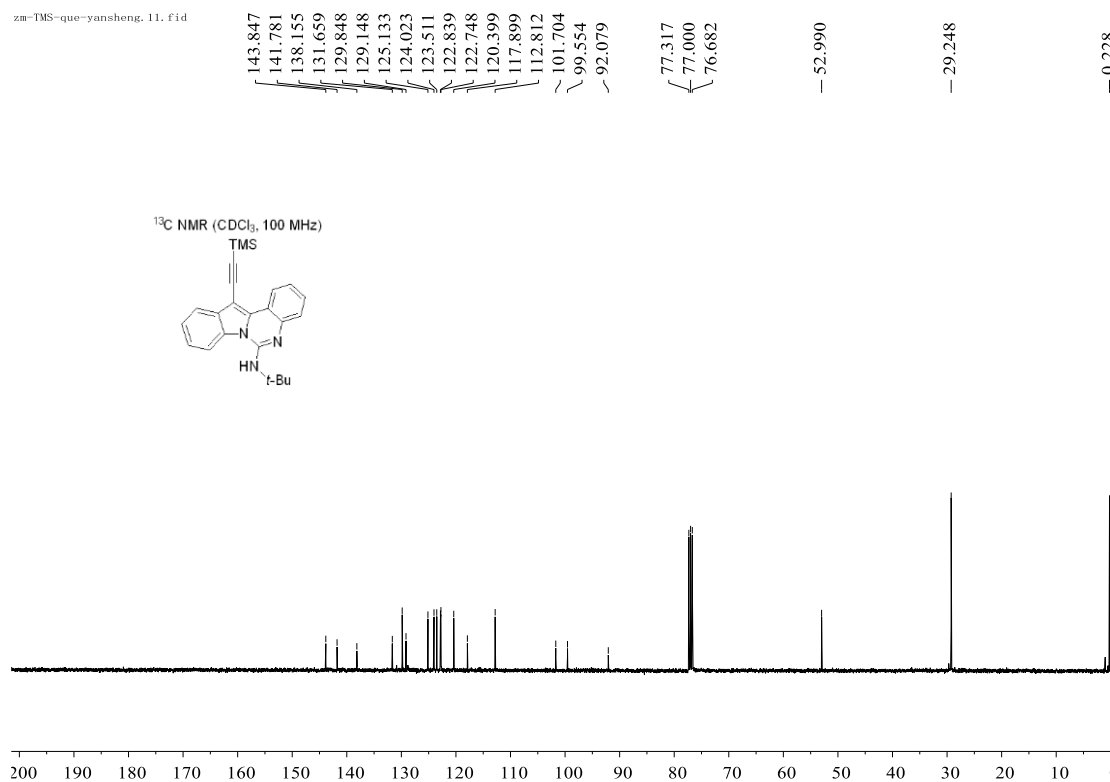

***N*-(*tert*-Butyl)-12-ethynylindolo[1,2-*c*]quinazolin-6-amine (5)**

<sup>1</sup>H NMR (400 MHz, CDCl<sub>3</sub>) of compound of 5

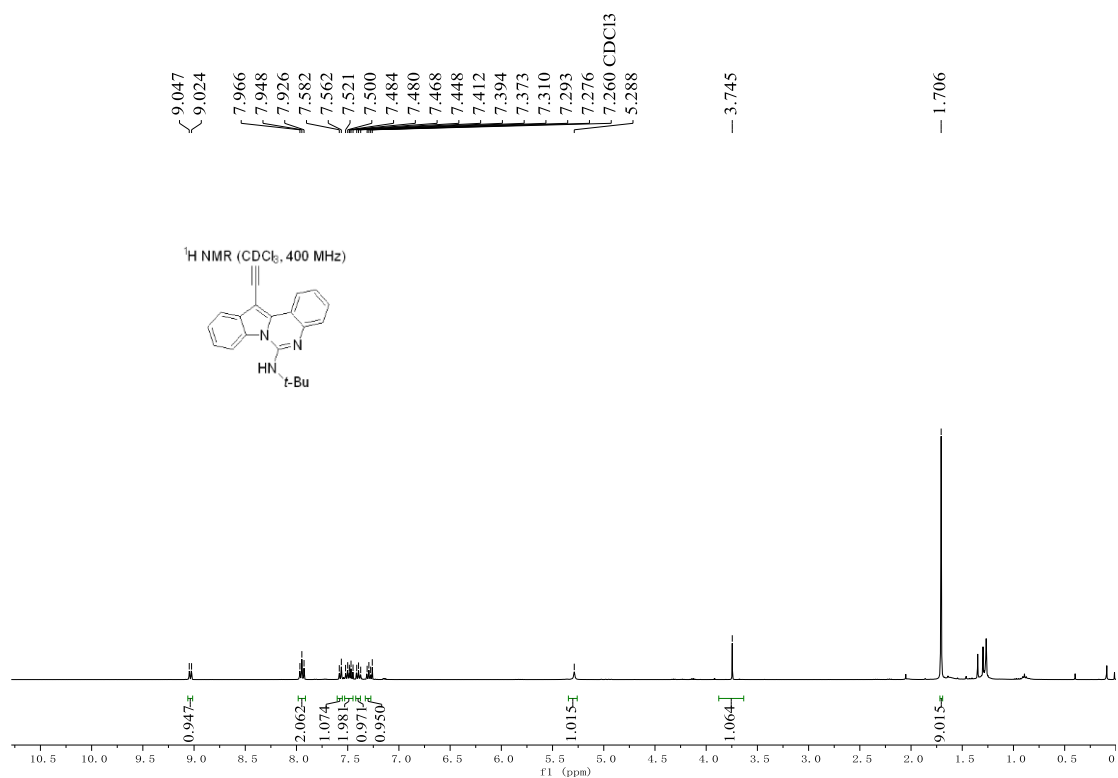

<sup>13</sup>C NMR (100 Mz, CDCl<sub>3</sub>) of compound 5

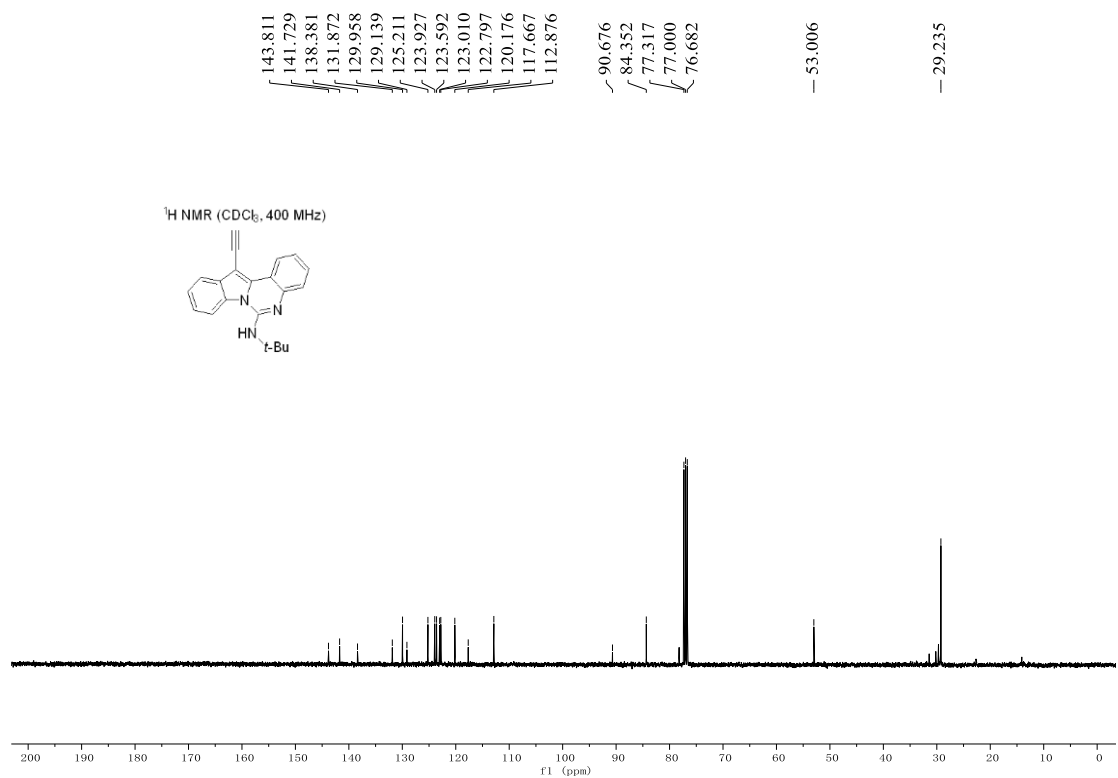



### 12-Iodoindolo[1,2-c]quinazolin-6-amine (6)

$^1\text{H NMR}$  (400 MHz,  $\text{DMSO-}d_6$ ) of compound of 6

8.382  
8.362  
8.111  
8.090  
7.807  
7.787  
7.443  
7.426  
7.409  
7.384  
7.368  
7.353  
7.336  
7.318  
7.245  
7.225  
7.208  
7.123

— 2.495

$^1\text{H NMR}$  ( $\text{CDCl}_3$ , 400 MHz)

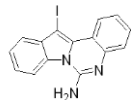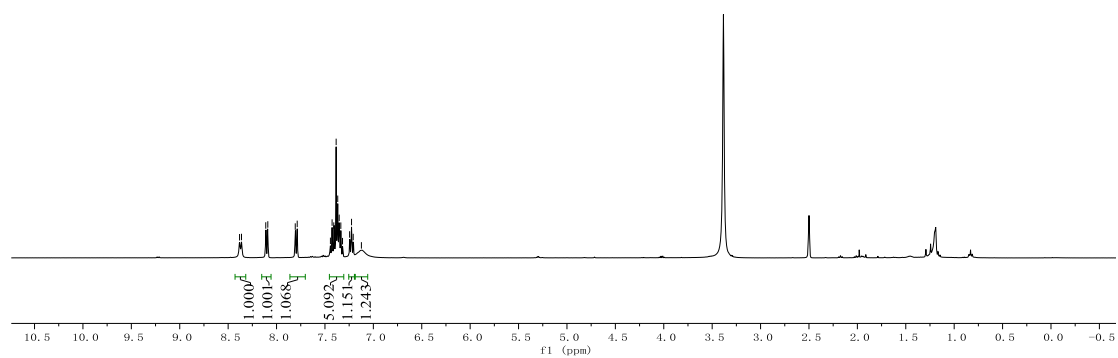

$^{13}\text{C NMR}$  (100 Mz,  $\text{DMSO-}d_6$ ) of compound 6

146.559  
135.147  
129.481  
128.660  
122.594  
122.498  
122.228  
121.025  
119.585  
114.467

— 94.869

— 39.000

$^{13}\text{C NMR}$  ( $\text{CDCl}_3$ , 100 MHz)

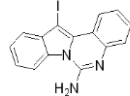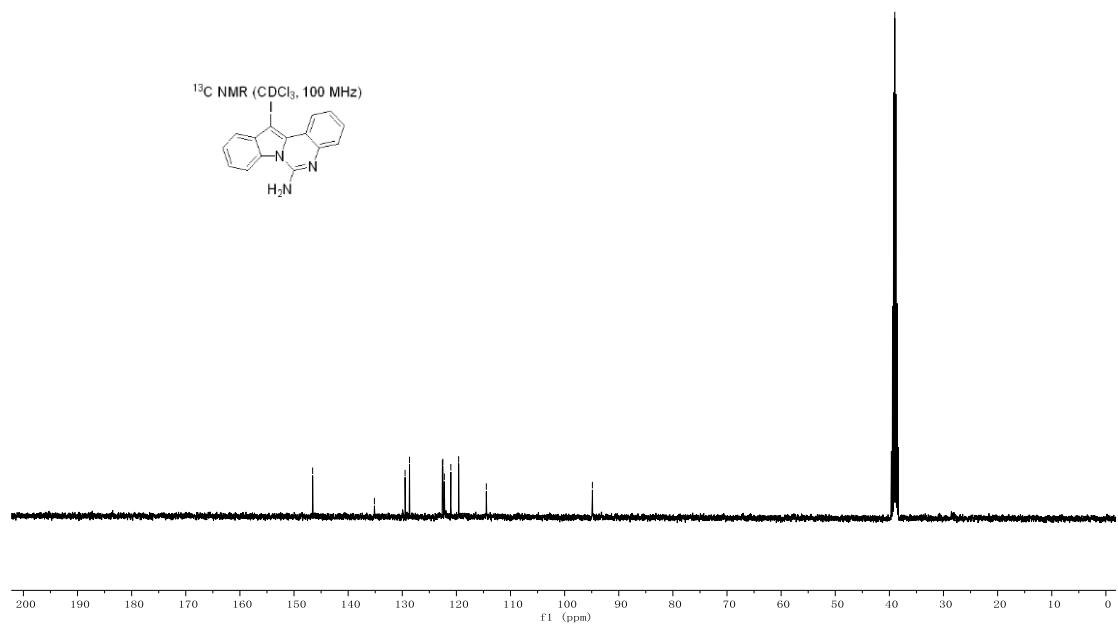

**(E)-N-(tert-Butyl)-12-styrylindolo[1,2-c]quinazolin-6-amine (7)**

<sup>1</sup>H NMR (400 MHz, CDCl<sub>3</sub>) of compound of 7

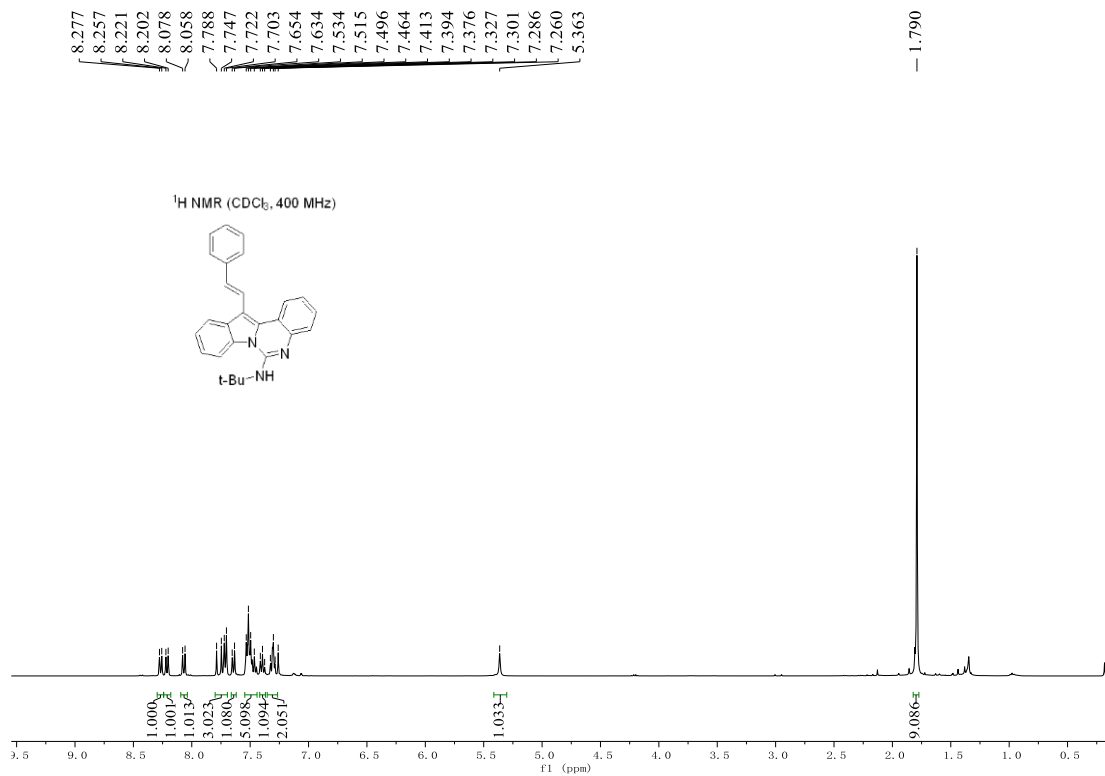

<sup>13</sup>C NMR (100 Mz, CDCl<sub>3</sub>) of compound 7

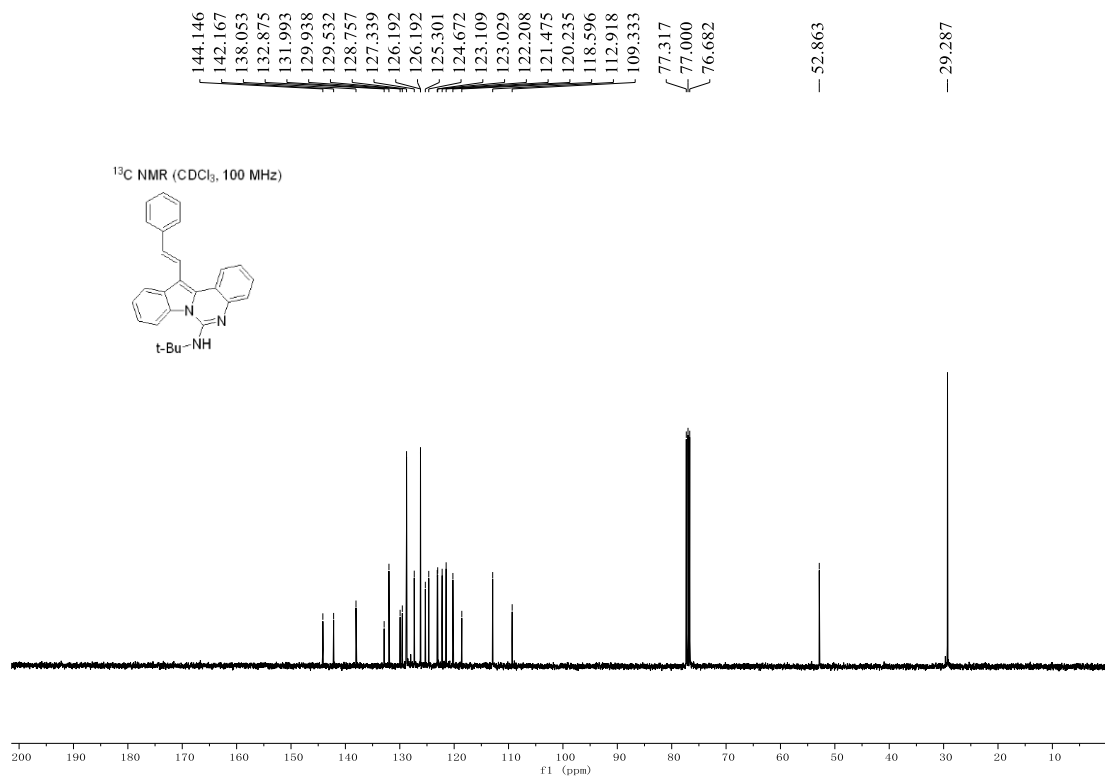

***N*-(*tert*-Butyl)-12-phenylindolo[1,2-*c*]quinazolin-6-amine (8)**

<sup>1</sup>H NMR (400 MHz, CDCl<sub>3</sub>) of compound **8**

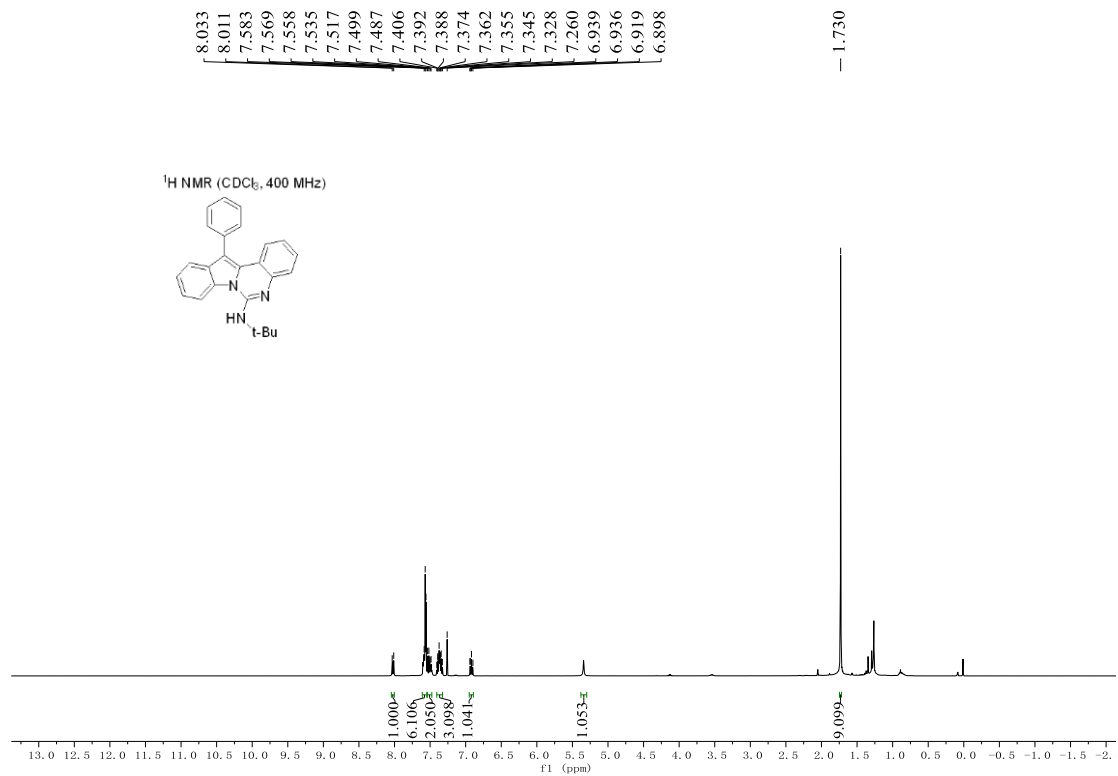

<sup>13</sup>C NMR (100 Mz, CDCl<sub>3</sub>) of compound **8**

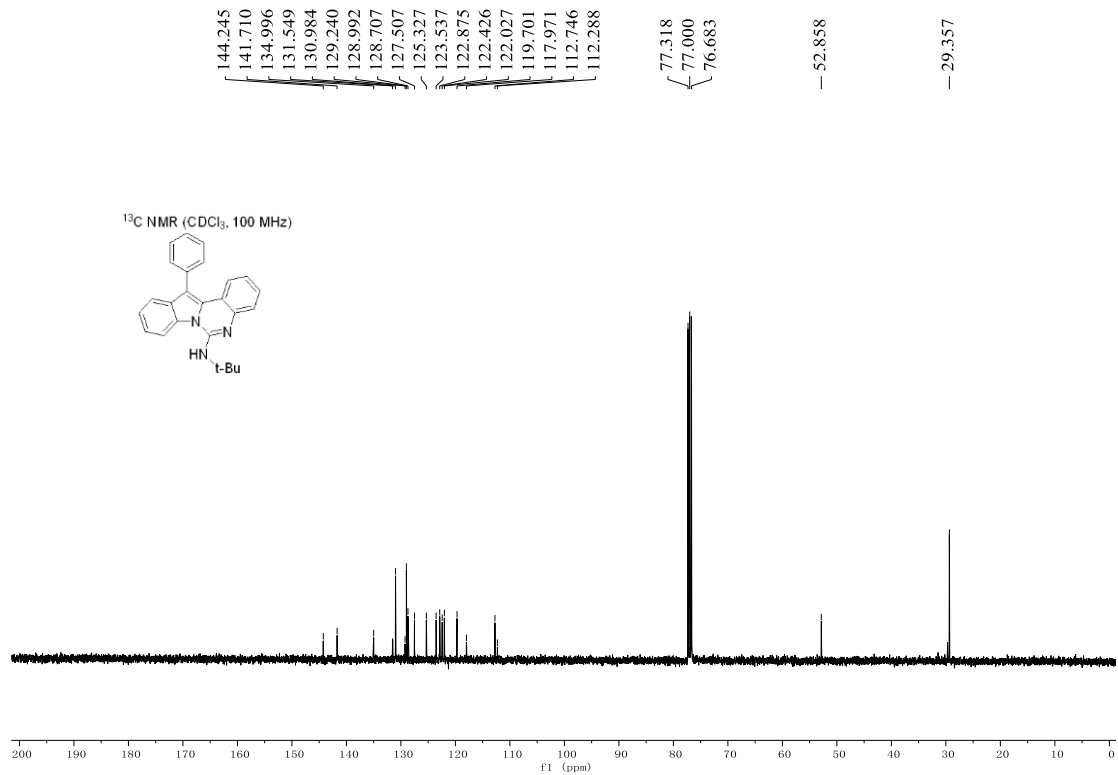

***N*-(*tert*-Butyl)-12-(4-methoxyphenyl)indolo[1,2-*c*]quinazolin-6-amine (9)**

<sup>1</sup>H NMR (400 MHz, CDCl<sub>3</sub>) of compound of 9

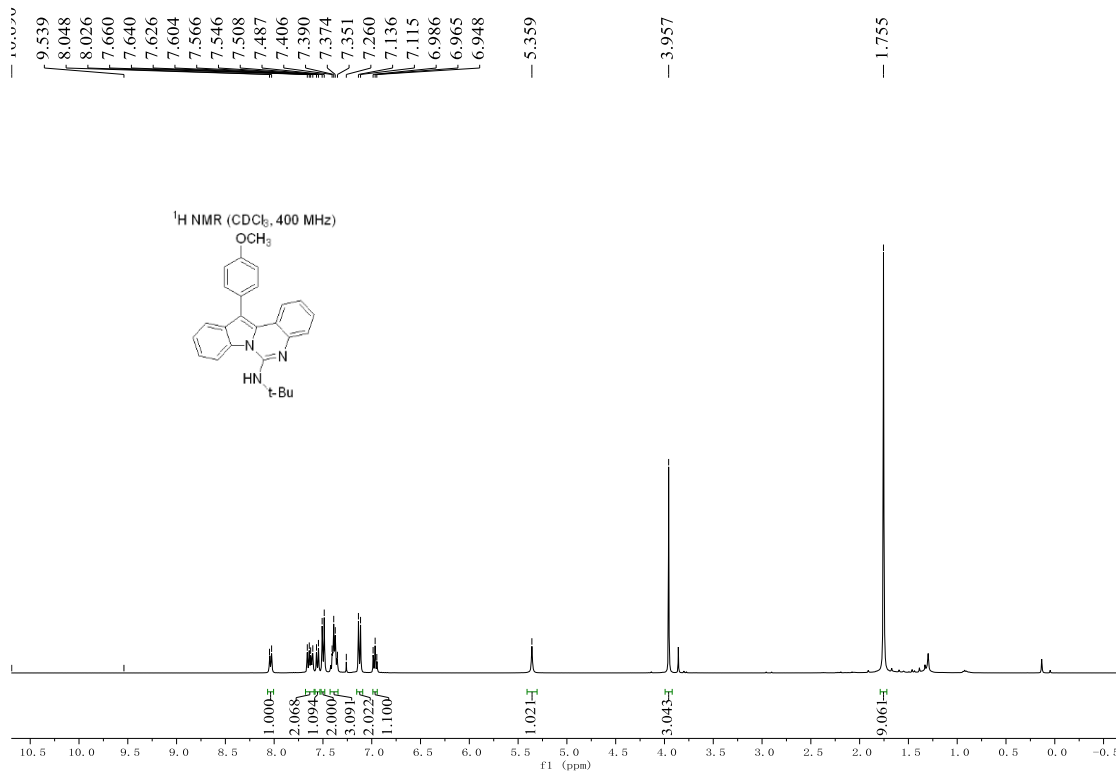

<sup>13</sup>C NMR (100 Mz, CDCl<sub>3</sub>) of compound 9

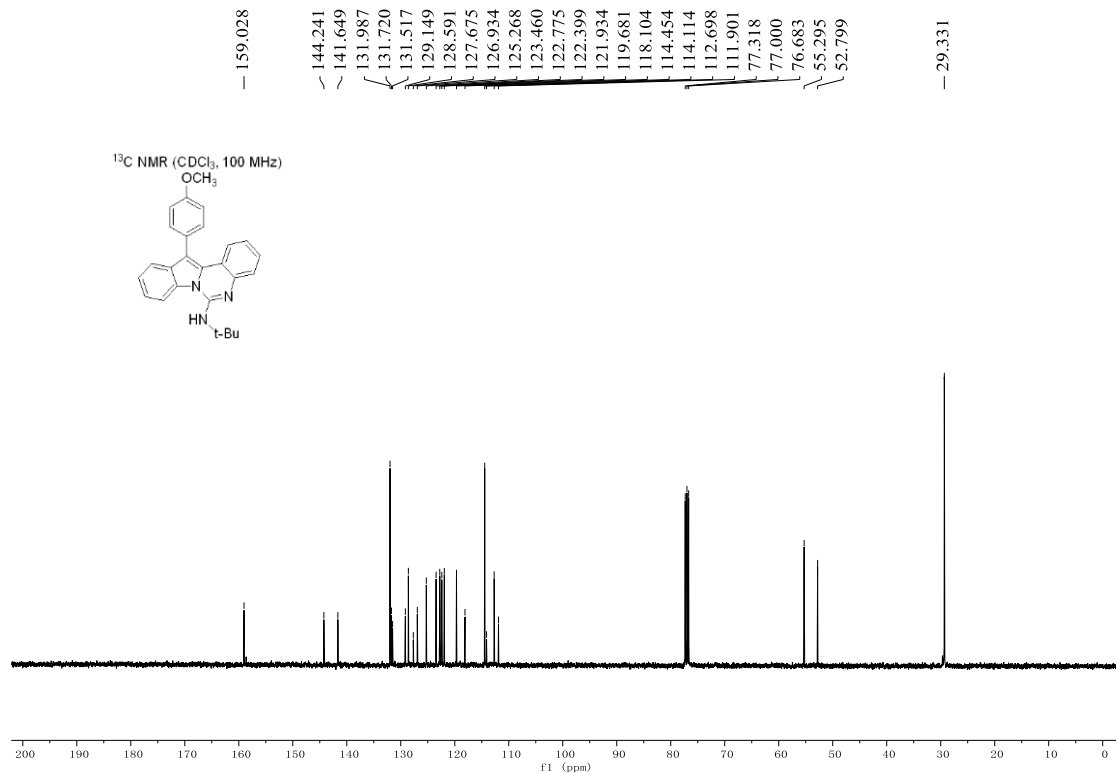

***N*-(*tert*-Butyl)indolo[1,2-*c*]quinazolin-6-amine (10)**

<sup>1</sup>H NMR (400 MHz, CDCl<sub>3</sub>) of compound **10**

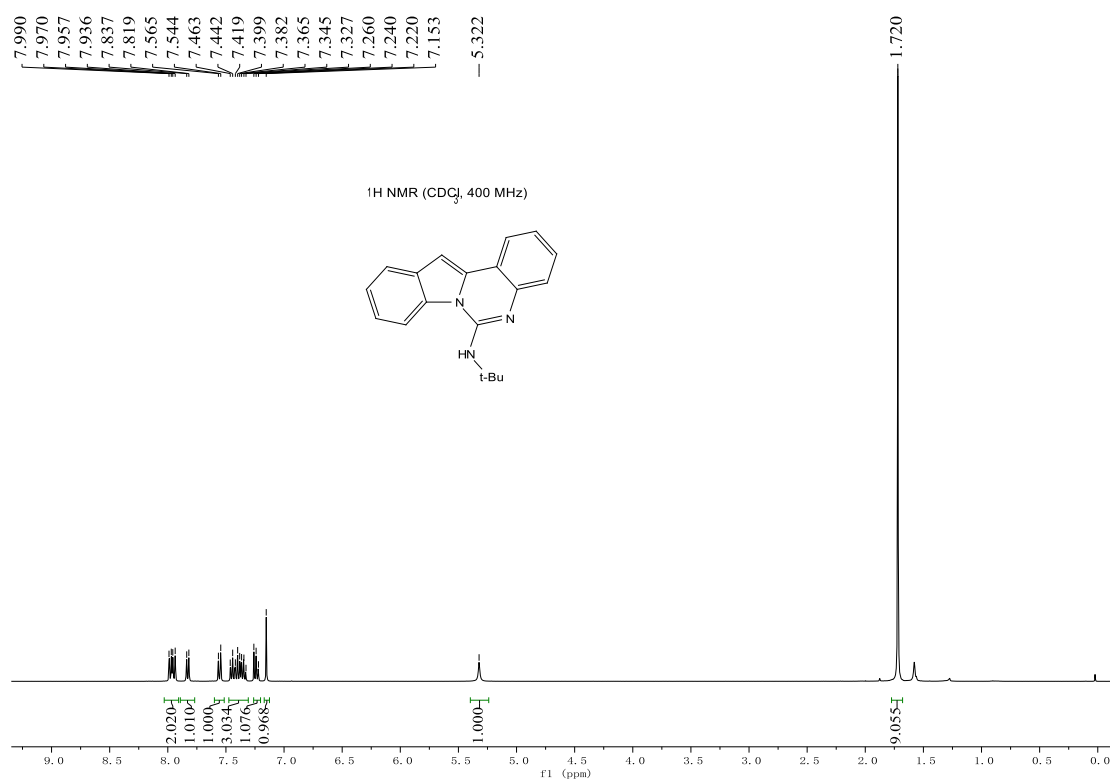

<sup>13</sup>C NMR (100 Mz, CDCl<sub>3</sub>) of compound **10**

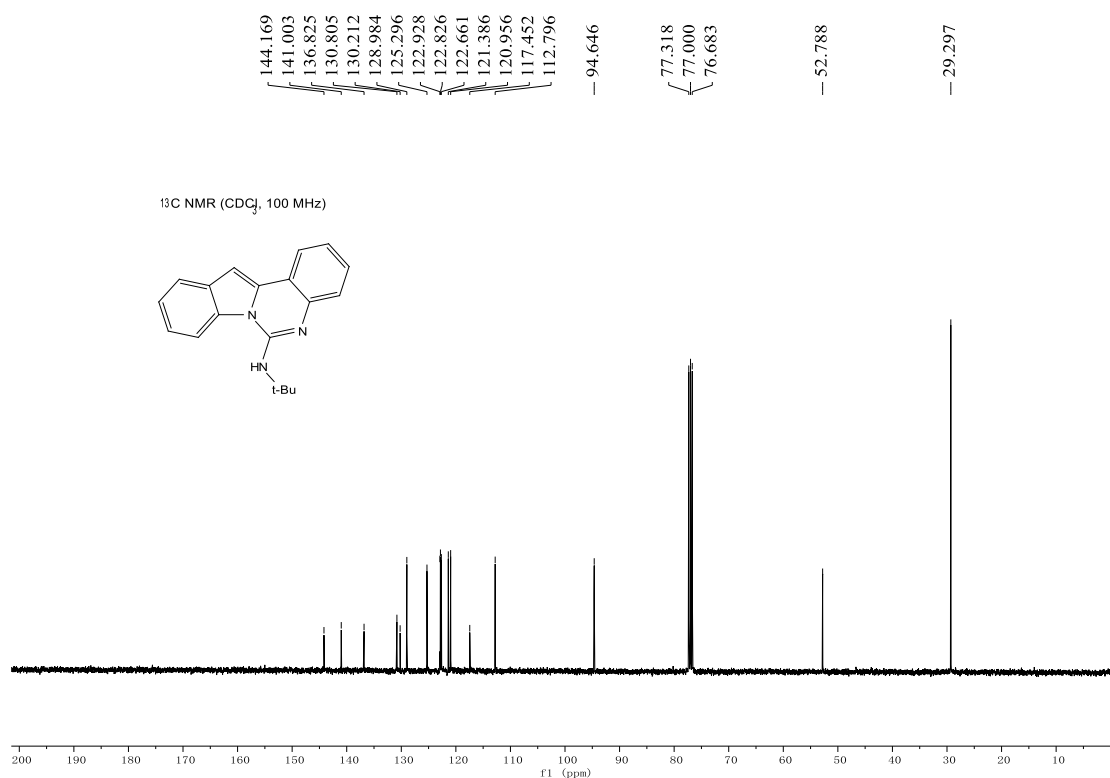

Supplement: d3qo00799e1.pdf [file d3qo00799e1.pdf]
